# Supplementary material for: Value signals guide abstraction during learning
Source: eLife. 2021 Jul 13;10:e68943. doi: 10.7554/eLife.68943 (PMC8331191; doi:10.7554/eLife.68943)
Supplement: Figure 1—source data 1. [file elife-68943-fig1-data1.csv]

	x	mean	SEM	CI95l	CI95u
0	1.0	0.48444444444444446	0.023585036623715472	0.4380936807443571	0.5307952081445318
1	2.0	0.5955555555555555	0.023161538649478574	0.5500370761060502	0.6410740350050608
2	3.0	0.5577777777777778	0.023438386670150087	0.5117152195807297	0.6038403359748259
3	4.0	0.6	0.02311971362558749	0.5545637176583498	0.6454362823416502
4	5.0	0.62	0.022906802560887334	0.5749821435699352	0.6650178564300648
5	6.0	0.6755555555555556	0.02209416207011157	0.6321347501694223	0.7189763609416888
6	7.0	0.7111111111111111	0.02139000967634638	0.6690741492921082	0.7531480729301141
7	8.0	0.7111111111111111	0.02139000967634638	0.6690741492921082	0.7531480729301141
8	9.0	0.74	0.020700429828876085	0.699318242884402	0.780681757115598
9	10.0	0.7333333333333333	0.020869493488717562	0.6923193219213946	0.774347344745272
10	11.0	0.7644444444444445	0.02002610411151485	0.725087913678119	0.80380097521077
11	12.0	0.7333333333333333	0.020869493488717562	0.6923193219213946	0.774347344745272
12	13.0	0.7888888888888889	0.01925929098532276	0.7510393464126945	0.8267384313650832
13	14.0	0.7911111111111111	0.019184621775458113	0.7534083131559165	0.8288139090663057
14	15.0	0.8155555555555556	0.018303594846813924	0.7795842058755754	0.8515269052355358
15	16.0	0.8266666666666667	0.017864180039482605	0.7915588819760431	0.8617744513572902
16	17.0	0.8377777777777777	0.017397883600105503	0.8035863875121697	0.8719691680433858
17	18.0	0.8488888888888889	0.016902480887598336	0.8156710944853586	0.8821066832924193
18	19.0	0.8644444444444445	0.016154891066654	0.8326958595099526	0.8961930293789363
19	20.0	0.86	0.016375330459611186	0.8278181940204802	0.8921818059795198
20	21.0	0.8888888888888888	0.014831303205911112	0.8597415001767471	0.9180362776010306
21	22.0	0.88	0.015335883071308199	0.8498609799208192	0.9101390200791808
22	23.0	0.8733333333333333	0.015696326313430434	0.842485948038976	0.9041807186276906
23	24.0	0.8844444444444445	0.015087160955335842	0.854794228356046	0.9140946605328429
24	25.0	0.9177777777777778	0.01296403526044227	0.8923000588094662	0.9432554967460894
25	26.0	0.9066666666666666	0.013728372115453503	0.8796868259285601	0.9336465074047732
26	27.0	0.9111111111111111	0.013430316263001726	0.8847170280551668	0.9375051941670554
27	28.0	0.9133333333333333	0.01327753730113286	0.8872395008842848	0.9394271657823818
28	29.0	0.9488888888888889	0.010393029768912569	0.9284638679473293	0.9693139098304485
29	30.0	0.92	0.012803117660409147	0.8948385261905711	0.9451614738094289
30	31.0	0.9311111111111111	0.01195231895723808	0.9076216792101255	0.9546005430120967
31	32.0	0.9377777777777778	0.011399861024037672	0.9153740701656518	0.9601814853899039
32	33.0	0.9555555555555556	0.009725535900804525	0.9364423345931753	0.9746687765179359
33	34.0	0.9377777777777778	0.011399861024037674	0.9153740701656518	0.9601814853899039
34	35.0	0.9511111111111111	0.010176478997821054	0.9311116690558628	0.9711105531663594
35	36.0	0.9555555555555556	0.009725535900804525	0.9364423345931753	0.9746687765179359
36	37.0	0.9577777777777777	0.009490295849286904	0.9391268650243966	0.9764286905311589
37	38.0	0.9688888888888889	0.008193539999327898	0.952786440440953	0.9849913373368249
38	39.0	0.9466666666666667	0.010604122500538835	0.925826793313448	0.9675065400198853
39	40.0	0.9622222222222222	0.008997725186893938	0.9445393396119537	0.9799051048324907
40	41.0	0.9577777777777777	0.009490295849286904	0.9391268650243966	0.9764286905311589
41	42.0	0.9622222222222222	0.008997725186893938	0.9445393396119537	0.9799051048324907
42	43.0	0.9577777777777777	0.009490295849286904	0.9391268650243966	0.9764286905311589
43	44.0	0.96	0.009247885450234998	0.9418254870633399	0.97817451293666
44	45.0	0.9666666666666667	0.008471388006036824	0.95001817423716	0.9833151590961734
45	46.0	0.9755555555555555	0.00728774080926317	0.9612332393536811	0.9898778717574299
46	47.0	0.9733333333333334	0.007603122608354665	0.9583912094339675	0.9882754572326993
47	48.0	0.9733333333333334	0.007603122608354665	0.9583912094339675	0.9882754572326993
48	49.0	0.9777777777777777	0.006956497829572522	0.9641064406404648	0.9914491149150907
49	50.0	0.9822222222222222	0.006236205872652561	0.9699664471136195	0.994477997330825
