# Supplementary material for: Value signals guide abstraction during learning
Source: eLife. 2021 Jul 13;10:e68943. doi: 10.7554/eLife.68943 (PMC8331191; doi:10.7554/eLife.68943)
Supplement: Figure 1—source data 2. [file elife-68943-fig1-data2.csv]

	x	mean	1	2	3	4	5	6	7	8	9	10	11	12	13	14	15	16	17	18	19	20	21	22	23	24	25	26	27	28	29	30	31	32	33
0	1.0	0.5024317246539469	0.012345679012345734	0.7654320987654322	0.7530864197530864	0.37037037037037035	0.012345679012345734	0.4814814814814815	0.5185185185185186	0.7407407407407407	0.012345679012345734	0.5308641975308642	0.5308641975308642	0.7654320987654322	0.7037037037037037	0.2962962962962963	0.37037037037037035	0.5925925925925926	0.012345679012345734	0.2962962962962963	0.2592592592592593	0.024691358024691357	0.7654320987654322	0.7654320987654322	0.7283950617283951	0.6790123456790124	0.654320987654321	0.7160493827160495	0.617283950617284	0.8765432098765432	0.012345679012345734	0.33333333333333337	0.7777777777777778	0.8518518518518519	0.7530864197530864
1	2.0	0.5102880658436213	0.32098765432098764	0.8271604938271605	0.012345679012345734	0.45679012345679015	0.0864197530864198	0.40740740740740744	0.012345679012345734	0.5185185185185186	0.617283950617284	0.2962962962962963	0.37037037037037035	0.691358024691358	0.691358024691358	0.654320987654321	0.6296296296296297	0.5802469135802469	0.6666666666666667	0.8024691358024691	0.8518518518518519	0.654320987654321	0.6049382716049383	0.4320987654320988	0.7654320987654322	0.4691358024691358	0.4444444444444444	0.4814814814814815	0.7037037037037037	0.7160493827160495	0.6666666666666667	0.012345679012345734	0.5061728395061729	0.7654320987654322	0.12345679012345678
2	3.0	0.5596707818930042	0.7654320987654322	0.7777777777777778	0.4444444444444444	0.012345679012345734	0.5679012345679013	0.6790123456790124	0.5679012345679013	0.2222222222222222	0.6790123456790124	0.7283950617283951	0.691358024691358	0.6296296296296297	0.6296296296296297	0.7160493827160495	0.49382716049382713	0.49382716049382713	0.28395061728395066	0.7407407407407407	0.2962962962962963	0.8641975308641976	0.5679012345679013	0.012345679012345734	0.8148148148148149	0.7407407407407407	0.5802469135802469	0.6419753086419753	0.5432098765432098	0.5061728395061729	0.3580246913580247	0.6049382716049383	0.5679012345679013	0.6296296296296297	0.617283950617284
3	4.0	0.6344930789375235	0.5432098765432098	0.8641975308641976	0.6790123456790124	0.012345679012345734	0.691358024691358	0.5308641975308642	0.7407407407407407	0.6790123456790124	0.5308641975308642	0.8148148148148149	0.45679012345679015	0.5679012345679013	0.6790123456790124	0.6049382716049383	0.5925925925925926	0.7654320987654322	0.2098765432098766	0.7283950617283951	0.7777777777777778	0.41975308641975306	0.6296296296296297	0.7407407407407407	0.6049382716049383	0.8888888888888888	0.7530864197530864	0.6049382716049383	0.691358024691358	0.7160493827160495	0.5802469135802469	0.7283950617283951	0.691358024691358	0.5185185185185186	0.9012345679012346
4	5.0	0.7433595211372991	0.7654320987654322	0.8148148148148149	0.7407407407407407	0.7777777777777778	0.8024691358024691	0.5432098765432098	0.8518518518518519	0.8765432098765432	0.49382716049382713	0.4691358024691358	0.8395061728395061	0.691358024691358	0.8765432098765432	0.8148148148148149	0.8641975308641976	0.8765432098765432	0.7407407407407407	0.7654320987654322	0.6296296296296297	0.6790123456790124	0.8641975308641976	0.7654320987654322	0.6666666666666667	0.691358024691358	0.7530864197530864	0.5555555555555556	0.7160493827160495	0.7777777777777778	0.7407407407407407	0.8271604938271605	0.7777777777777778	0.7283950617283951	0.7530864197530864
5	6.0	0.6337448559670782	0.7160493827160495	0.7654320987654322	0.8024691358024691	0.7160493827160495	0.8395061728395061	0.7777777777777778	0.5555555555555556	0.6790123456790124	0.7407407407407407	0.7037037037037037	0.5679012345679013	0.04938271604938271	0.32098765432098764	0.6419753086419753	0.8765432098765432	0.7530864197530864	0.7160493827160495	0.7407407407407407	0.4691358024691358	0.7037037037037037	0.8148148148148149	0.5802469135802469	0.8148148148148149	0.617283950617284	0.5555555555555556	0.617283950617284	0.6790123456790124	0.5925925925925926	0.7283950617283951	0.9012345679012346	0.7530864197530864	0.012345679012345734	0.11111111111111116
6	7.0	0.6812570145903482	0.8148148148148149	0.7654320987654322	0.8641975308641976	0.8024691358024691	0.7777777777777778	0.49382716049382713	0.691358024691358	0.8271604938271605	0.6790123456790124	0.7654320987654322	0.07407407407407407	0.7901234567901234	0.7160493827160495	0.7901234567901234	0.8641975308641976	0.617283950617284	0.691358024691358	0.654320987654321	0.8024691358024691	0.5432098765432098	0.32098765432098764	0.7037037037037037	0.5802469135802469	0.6296296296296297	0.8395061728395061	0.6419753086419753	0.5308641975308642	0.6790123456790124	0.7530864197530864	0.5061728395061729	0.8888888888888888	0.5679012345679013	0.8148148148148149
7	8.0	0.6629255518144408	0.4814814814814815	0.7283950617283951	0.6419753086419753	0.8024691358024691	0.7777777777777778	0.8271604938271605	0.7654320987654322	0.6296296296296297	0.691358024691358	0.691358024691358	0.5555555555555556	0.7901234567901234	0.3950617283950617	0.5555555555555556	0.7283950617283951	0.345679012345679	0.7283950617283951	0.5555555555555556	0.6790123456790124	0.8271604938271605	0.8641975308641976	0.7654320987654322	0.7530864197530864	0.7777777777777778	0.012345679012345734	0.6419753086419753	0.6419753086419753	0.7777777777777778	0.7654320987654322	0.8518518518518519	0.6666666666666667	0.5555555555555556	0.6049382716049383
8	9.0	0.7141788252899363	0.7654320987654322	0.8641975308641976	0.5679012345679013	0.7283950617283951	0.8765432098765432	0.6049382716049383	0.8641975308641976	0.4320987654320988	0.9012345679012346	0.8271604938271605	0.6666666666666667	0.691358024691358	0.8024691358024691	0.654320987654321	0.19753086419753085	0.9012345679012346	0.654320987654321	0.6790123456790124	0.9012345679012346	0.9012345679012346	0.8765432098765432	0.691358024691358	0.7654320987654322	0.7160493827160495	0.5308641975308642	0.654320987654321	0.7901234567901234	0.4444444444444444	0.8024691358024691	0.7530864197530864	0.5802469135802469	0.7407407407407407	0.7407407407407407
9	10.0	0.7194163860830526	0.6666666666666667	0.8271604938271605	0.654320987654321	0.5061728395061729	0.7530864197530864	0.5185185185185186	0.7777777777777778	0.345679012345679	0.8271604938271605	0.7530864197530864	0.7283950617283951	0.8395061728395061	0.8148148148148149	0.7283950617283951	0.8024691358024691	0.6790123456790124	0.5185185185185186	0.7037037037037037	0.9012345679012346	0.8271604938271605	0.8518518518518519	0.8518518518518519	0.691358024691358	0.654320987654321	0.8271604938271605	0.7407407407407407	0.6666666666666667	0.8518518518518519	0.7037037037037037	0.7530864197530864	0.8271604938271605	0.5802469135802469	0.5679012345679013
10	11.0	0.681257014590348	0.41975308641975306	0.654320987654321	0.6296296296296297	0.8148148148148149	0.8518518518518519	0.654320987654321	0.617283950617284	0.6419753086419753	0.7037037037037037	0.5432098765432098	0.3580246913580247	0.8395061728395061	0.7530864197530864	0.691358024691358	0.5679012345679013	0.8271604938271605	0.7037037037037037	0.617283950617284	0.7530864197530864	0.8765432098765432	0.8641975308641976	0.7901234567901234	0.5308641975308642	0.49382716049382713	0.6790123456790124	0.5925925925925926	0.7283950617283951	0.7777777777777778	0.7777777777777778	0.6296296296296297	0.7407407407407407	0.6049382716049383	0.7530864197530864
