# Supplementary material for: Value signals guide abstraction during learning
Source: eLife. 2021 Jul 13;10:e68943. doi: 10.7554/eLife.68943 (PMC8331191; doi:10.7554/eLife.68943)
Supplement: Figure 1—source data 3. [file elife-68943-fig1-data3.csv]

confidence	learningspeed	totaltrials	propcorr
7	0.609347442680776	443	0.0115315881187416
6.5	0.769753086419753	373	0.0120313305723865
7.5	0.613168724279835	376	0.0449186630323133
4.5	0.534979423868313	452	0.0058137172930766
7	0.644824311490978	374	0.0199589286121565
4	0.584362139917695	404	0.031331369889419
7	0.632275132275132	417	0.0185874654139091
5	0.599326599326599	357	0.0297604152516319
6	0.653371320037987	365	0.0596514510254309
5	0.520576131687243	466	0.0442362996480644
7.5	0.633428300094967	386	0.0280784548153058
7.5	0.661265432098765	439	0.00977047719594595
7	0.674897119341564	395	0.0182383026735915
4	0.593542260208927	428	0.0199348302916235
7	0.702160493827161	386	0.0122556480948867
6	0.538720538720539	411	0.0268642023737132
7	0.640329218106996	437	0.00611939770673652
8	0.722222222222222	360	0.0330827438126258
6.5	0.683127572016461	308	0.0946470162407151
7.5	0.73015873015873	306	0.0188713293790035
4	0.652263374485597	338	0.0317837121929016
5	0.705603038936372	310	0.0388471866647228
7.5	0.62962962962963	390	0.0166103749609806
6	0.593621399176955	395	0.0242242192461681
6	0.653371320037987	365	0.0205800417680649
8	0.699845679012346	389	0.0120791497478027
8	0.686067019400353	356	0.0648315052078851
8	0.644824311490978	374	0.0236060236060236
7	0.662551440329218	410	0.011289105199492
8	0.733024691358025	346	0.023075629872752
5	0.616255144032922	373	0.0216119786392717
