# Supplementary material for: Value signals guide abstraction during learning
Source: eLife. 2021 Jul 13;10:e68943. doi: 10.7554/eLife.68943 (PMC8331191; doi:10.7554/eLife.68943)
Supplement: Figure 2—source data 1. [file elife-68943-fig2-data1.csv]

model_m1_b1	model_m1_b2	model_m1_b3	model_m1_b4	model_m1_b5	model_m1_b6	model_m1_b7	model_m1_b8	model_m1_b9	model_m1_b10	model_m1_b11	model_m1_b12	model_m1_b13	model_m1_b14	model_m1_b15	model_m1_b16	model_m1_b17	model_m1_b18	model_m1_b19	model_m1_b20	model_m2_b1	model_m2_b2	model_m2_b3	model_m2_b4	model_m2_b5	model_m2_b6	model_m2_b7	model_m2_b8	model_m2_b9	model_m2_b10	model_m2_b11	model_m2_b12	model_m2_b13	model_m2_b14	model_m2_b15	model_m2_b16	model_m2_b17	model_m2_b18	model_m2_b19	model_m2_b20	model_m3_b1	model_m3_b2	model_m3_b3	model_m3_b4	model_m3_b5	model_m3_b6	model_m3_b7	model_m3_b8	model_m3_b9	model_m3_b10
0.632007957718501	0.588291939120938	0.589377057442293	0.700745659531357	0.687006756230449	0.676826391263715	0.583379311814548	0.749904349199951	0.710202459366651	0.622943644224889	0.650065824206695	0.637431634120549	0.744847447969168	0.587063931005329	0.720385839135121	0.64166183805118	0.591435010174693	0.652281356013216	0.701292567214757	0.646833726942287	0.578447995764791	0.568171983043158	0.539733111597427	0.635754674991765	0.615327229630779	0.554914322334455	0.537059415341553	0.564538121176455	0.619872970087591	0.565652345323973	0.54143973632612	0.57280490506395	0.59792558291732	0.547673955736111	0.544219344598878	0.549084720853137	0.55089361750507	0.579187741728029	0.55937278763493	0.613255613215188	0.526414993088276	0.552038443925918	0.506871323790311	0.583522646473694	0.5154465328251	0.665983058935002	0.569243844715064	0.559275301256284	0.537236089554856	0.561478257403722
0.661236832880451	0.70557338676055	0.665199358818657	0.533815131954304	0.682086946217212	0.777433904636434	0.558158740302689	0.616959426590237	0.806349380350037	0.74874984946573	0.646607504549191	0.724017655414992	0.700775071745426	0.786023813918333	0.681794413490877	0.737632828557883	0.721392733808555	0.679691471748655	0.598427146321026	0.641615808741823	0.596321118821105	0.612052462735566	0.547992595327344	0.522059430818638	0.570495530836867	0.555213604554751	0.529225984679709	0.554257951551697	0.517029634216204	0.560719603290775	0.591825568387316	0.553134544273348	0.572119355431864	0.580236446786944	0.581639667154964	0.660450226998923	0.582764015612827	0.592036726810625	0.549941808578997	0.541660397146414	0.52844068885699	0.608876237480123	0.543664676153573	0.519451807064885	0.570128037118759	0.527666718706924	0.50394351229423	0.556663084971779	0.50976991719507	0.55135122837398
0.580434955017933	0.62168531402757	0.741203705656803	0.568559325289755	0.559027659152906	0.663567286511534	0.672293853830359	0.590048052611506	0.636416364673055	0.655316016620185	0.583584212944237	0.631471294587624	0.583775632109847	0.648049022125935	0.645817912965779	0.628003069875722	0.67136628276207	0.808914357984105	0.673742213570191	0.768004781408791	0.537151843387985	0.601690713639006	0.562103136301196	0.524058320645012	0.523221492019031	0.591835253102376	0.565179663507069	0.563189213799454	0.556882312272932	0.53115946993973	0.575203532985541	0.572524397270729	0.547050607492955	0.581185643821559	0.579870763237179	0.574612741563761	0.526837128552646	0.548253435310055	0.558048694422339	0.54465647526848	0.567037618294632	0.554286110871751	0.531205266836393	0.513176881355455	0.552670852826208	0.582044246830159	0.512204731224829	0.501930450534235	0.524211988829468	0.527250100070988
0.67294478216809	0.660871931057881	0.770111065612526	0.714068238720854	0.715120639140222	0.73916751042864	0.727930159635241	0.718761616806243	0.679957501668307	0.68801759555423	0.728509662696641	0.717457686229676	0.676845306554901	0.727234486639301	0.6590318430458	0.719487418186972	0.744453640771347	0.647467977367066	0.618420694071824	0.711835413641679	0.605412405322098	0.572413952947037	0.540788348125141	0.561742163978636	0.549953851841294	0.559532941188352	0.545366520029821	0.548014435166322	0.527334159379161	0.618793526543669	0.570118741755331	0.55795620068047	0.607688373644276	0.558760070414038	0.571192761716029	0.593992492255259	0.578270001514798	0.577672111959972	0.569509439013441	0.584246146779547	0.562279831371499	0.552088355813075	0.508743887714951	0.589901901382714	0.516771160288734	0.618608949314793	0.51710739500375	0.602260487521629	0.491470166925054	0.507403953760847
0.68767736857116	0.602470012179909	0.732391253033899	0.604327921741705	0.589696009114555	0.634404853490551	0.625200656575999	0.661674329044611	0.72040519363391	0.828991838228157	0.723473354564772	0.77369733275771	0.733911118027766	0.801390901884782	0.640729177944522	0.594305025574289	0.581735676795123	0.601845061611988	0.708489935401358	0.639971503699955	0.586914153566778	0.549960672382962	0.575902701170363	0.554535923845291	0.554907327375278	0.573018111050575	0.56944927791556	0.546067716808626	0.554341945349274	0.581658659210446	0.596591679936842	0.543656145323319	0.65037687208456	0.557087007274172	0.53560063354823	0.55234959340386	0.54290986485113	0.559765904470457	0.555099749992375	0.569426395062899	0.519338936322456	0.587909264956954	0.51704525987865	0.494984778929348	0.54157141724665	0.606424661065028	0.578875487966917	0.500945431441868	0.570056298063797	0.5037082862624
0.674005363063666	0.640517605930181	0.606088794886255	0.639463315156022	0.739508902805061	0.676527467891264	0.613752681195561	0.6714936522549	0.638112125465159	0.809848987482277	0.810087916993784	0.589566124845414	0.708433689766162	0.639208453172792	0.691325630473983	0.786108592617796	0.793168435387566	0.680140271825683	0.738359600347433	0.63102949989652	0.604082246204405	0.574272801313903	0.548840941070532	0.611491636273994	0.559461710306064	0.605798022267052	0.557959411950577	0.563748152436218	0.531654598477573	0.587403584127414	0.539402540185668	0.535082518915999	0.561032963896463	0.594752089698252	0.549230187208362	0.545852420876944	0.544726929447109	0.564086685957384	0.543286608697432	0.556634364122401	0.578461916664811	0.505489813291652	0.525160912537997	0.567978994614458	0.625550588046708	0.523809185475043	0.593520535887176	0.57056028397298	0.557252951909127	0.506063372507943
0.726533450358493	0.725002382170432	0.702951288289858	0.654896502013587	0.780831119434116	0.780887402075742	0.697750045775463	0.715678981540944	0.812748105490867	0.679696954595926	0.711923269577971	0.62681481355349	0.726167914870901	0.615400264268934	0.816222850520143	0.638395313042099	0.692565351626515	0.726675918687849	0.686748128370542	0.691592248713284	0.552183079435345	0.536791613640632	0.582910280314028	0.556048269492728	0.555974467687383	0.558630566620308	0.614838211168732	0.547907252694634	0.56981204598865	0.610046895428976	0.557098170697381	0.581476100984832	0.560949139785205	0.566955420414304	0.549874154563519	0.570851871221305	0.604732869398728	0.554440638416953	0.56537905123482	0.608388075498196	0.51962711333781	0.524936752825692	0.609083249088802	0.510223180146935	0.525567612994392	0.501623800279558	0.520271792713784	0.558496603035949	0.52959491722604	0.495891007335659
0.810345507035589	0.656900245751117	0.596764736985481	0.700514913388462	0.622254815778457	0.763376208655878	0.619082269776127	0.724285048108787	0.642985589437209	0.74658115580557	0.64660592834723	0.699718465202747	0.714612536896407	0.682294391387354	0.838222542261435	0.662307211598629	0.619420513297066	0.626431116202363	0.572553234940067	0.6237510777834	0.557853265383286	0.505719179978438	0.547665739463016	0.552091277237736	0.588541036463865	0.543113666431178	0.568789684773252	0.540549165673	0.588062465243776	0.564499884010914	0.550157226019527	0.54637028420696	0.562315896902775	0.561278846385601	0.555040579638337	0.605437379541764	0.527604701733812	0.578485641932604	0.523920747852673	0.57066808094025	0.571610714039077	0.50983277319467	0.516589327613393	0.515638123111295	0.60282047917647	0.519300749359816	0.575908592415505	0.501796157430682	0.585557754080203	0.525929238353535
0.574371990769976	0.682886384778887	0.592570965062791	0.734328257986285	0.684905025481512	0.63506689706476	0.590842489030238	0.744675874005192	0.651949752038262	0.648037673230624	0.645792538035948	0.633851860610332	0.667000173021551	0.689075947355107	0.674250373489983	0.636365796690903	0.652930565194942	0.641187189757539	0.7279989214127	0.585714319212523	0.533070896402221	0.61285213125361	0.562189796457566	0.550024822198287	0.55024306667925	0.589754008357571	0.540449013893035	0.55848417892671	0.569286106217066	0.610017350256794	0.574780687789907	0.575067666974042	0.558894777036906	0.542101740125899	0.612128417279302	0.581969173568257	0.589300751162994	0.588769669158863	0.592408917390424	0.555984723933787	0.511306883077407	0.518059950390262	0.516180266649969	0.535235188814073	0.585415425205516	0.538877662757301	0.537126427021206	0.575742077827646	0.512750029009138	0.534680628285425
0.667453446425212	0.676858300978555	0.680635183707394	0.644320916218015	0.677497192994027	0.591050465490543	0.654755638594777	0.756894301771751	0.635418981772284	0.619238366225357	0.587346155588793	0.599013564204109	0.68229217059445	0.703400320465796	0.575993809354103	0.625979959623698	0.741360079419045	0.579964694015972	0.667786520460912	0.732616696098908	0.603838662109775	0.59833306075982	0.559346252960817	0.576302900555952	0.600637120529215	0.554436550351708	0.545677387239922	0.542830279380029	0.576356607905054	0.575692736276701	0.545341885918991	0.534903867066839	0.545324301814135	0.570768514974006	0.530449677083789	0.56870505742705	0.56243353565543	0.530223405034109	0.552545460174965	0.570612183037941	0.509211565883454	0.529696318347032	0.515851869968098	0.545395527066302	0.514199893122022	0.52543754161925	0.601013825863123	0.551127346626591	0.532633462677019	0.618390354872859
0.745351579618185	0.779480817223102	0.719265569705656	0.762949180526102	0.709938711053099	0.560800869894441	0.703746235591457	0.62619906620624	0.707237795212681	0.635717850558362	0.667731285592862	0.682205418867922	0.81670678069884	0.642670214666008	0.793740512249366	0.600938094917926	0.620409389827986	0.740775951337204	0.647132982665889	0.79230544772872	0.549346674827525	0.552160014430755	0.640246054524661	0.54206755443076	0.591885405138028	0.532682807395375	0.537753187215227	0.568784037605455	0.606145174155203	0.582048527381501	0.607307541360375	0.568948913223031	0.549029656784101	0.536826668114304	0.537656332545291	0.555814357589294	0.5400942801752	0.563910102853115	0.586769418311431	0.561669931008561	0.558812701729399	0.4787298411695	0.52057838881056	0.676322223947159	0.513685405194957	0.499068904850063	0.593026646748402	0.511247634826821	0.58817540464559	0.51796597868214
0.77529048893921	0.640340310995385	0.602476292679067	0.624702716611012	0.831756129698437	0.590559963706902	0.685552271826362	0.657262497231764	0.647351235930351	0.600770284174038	0.800619562657593	0.608562253616772	0.694800782872272	0.732012912017486	0.639694171238641	0.585642596874572	0.73769112180462	0.635386780346607	0.688356292577675	0.700679293565778	0.575003854862593	0.579067589634888	0.55006340061145	0.536367857490957	0.587460254689888	0.553981908138101	0.552478739825917	0.592938694339345	0.590297873643307	0.560187462808579	0.552265512352139	0.574357473315891	0.610184414791492	0.554859882419134	0.576089926997893	0.555493846874027	0.63551885910333	0.568688598567899	0.615964467292491	0.54656570763168	0.50745558781643	0.520130369289747	0.565348611100889	0.534729149511733	0.559871864769166	0.546461074631265	0.561996120323547	0.506802246075883	0.621526521015121	0.514989064444804
0.650846120584481	0.780617544138463	0.750539780738511	0.638848790563619	0.615038694423504	0.631556848548733	0.734984790850523	0.593182901417781	0.687687041715716	0.678517736489161	0.626810545501358	0.630059666166779	0.677391829653099	0.676690181757518	0.676592468781121	0.58841289983307	0.704844540840115	0.699904274790442	0.622752934529352	0.811818052483115	0.583218759304053	0.535129062801	0.584381830767375	0.580152047199694	0.55511659314551	0.563691754980444	0.54801669383297	0.536653089429321	0.60491102925231	0.574401882630182	0.577569088460324	0.560264130309115	0.599304212683088	0.588070997870415	0.559521562588344	0.553439475448589	0.549341450576564	0.556754954602099	0.582969120590175	0.523202531815261	0.517710763999497	0.533740614377657	0.52240556853495	0.507837086518421	0.572745471905232	0.568880081051136	0.494491716864011	0.49792352693492	0.518230400954093	0.581641982155377
0.655894017872112	0.771322319476901	0.77560769093779	0.726332032420269	0.701143522820644	0.64120420062219	0.681685959705476	0.706169643895956	0.766260442316235	0.705763163438644	0.771447354473808	0.721300656788673	0.640137660038901	0.745289296056252	0.617403754527315	0.613228410066516	0.714013623655806	0.751027824563359	0.590711825154547	0.591549896978736	0.580159608950129	0.538771029555739	0.565325812414904	0.567998769442816	0.584978169494016	0.577767898851189	0.564170971904711	0.557323119730023	0.54790031278705	0.557122265405639	0.583612941157802	0.552971989841819	0.580476864413875	0.527812102733697	0.553238340985245	0.559558442717989	0.538938927037124	0.547101926162036	0.539363908694474	0.541989868229508	0.555952636736092	0.510152189069254	0.504188242785015	0.525877859543367	0.506454006588821	0.497421615406338	0.524338501618506	0.501573145206848	0.515716997652225	0.496884387168362
0.655093864630588	0.748897442712044	0.642996859950111	0.587753506779719	0.649823122359246	0.799009625667825	0.65357624619098	0.811646167048148	0.675170944269871	0.670531736963121	0.651372765850649	0.675637005951304	0.796867857090516	0.62926830779356	0.707729510002804	0.656233827858803	0.592093330137083	0.729575398645743	0.595609991809653	0.696114885676456	0.58398859950321	0.542458479988018	0.569549890705722	0.550952755909616	0.586568199857295	0.57056724541645	0.54886602069901	0.592077903126077	0.59425465223498	0.605238009309693	0.586157789255328	0.60135420112344	0.587819135341388	0.565011035810809	0.621860093691899	0.583935133401543	0.543585255110019	0.607380697686226	0.525280863116745	0.604246069487113	0.510442862903162	0.49366410128083	0.5180066212627	0.54082742909092	0.525580034570957	0.522527093708734	0.687207006114018	0.496937265765494	0.639234939821833	0.550170857766018
0.664257856821329	0.650497879377407	0.683289167177898	0.58646182290205	0.703274709440063	0.725028649355768	0.760380962786729	0.69624424175709	0.756785321460234	0.722556718166307	0.598001637596371	0.574978799969007	0.718658100364027	0.631158147027168	0.619391807468888	0.626626601087843	0.65000802411542	0.798116302413861	0.6242770388971	0.719172838341573	0.591184771105564	0.58517268828878	0.542743823923349	0.539341990560899	0.562946934579214	0.553092759707076	0.554828844187746	0.552710580845623	0.543374026595147	0.558071189077739	0.555833224367886	0.52648614112285	0.613363690353793	0.582278150663538	0.558257595483747	0.576451876341488	0.554279422577212	0.590253075091778	0.578470115751043	0.52373448154685	0.520176516663822	0.502261111671957	0.512941918334324	0.558073649853461	0.505476400532301	0.529271009155096	0.505193064701925	0.488402396648639	0.616180564779243	0.520097181667094
0.57932722646071	0.740734125113372	0.588543015613228	0.663376532238611	0.731943422602613	0.801107472817896	0.594583756742149	0.581686424069596	0.648722174358221	0.6954921522702	0.69003297450429	0.747160893761876	0.786161278432272	0.624747003518162	0.726209075223272	0.630486371934487	0.607160575956951	0.722962761082583	0.700303494643356	0.711061713359176	0.542384480073501	0.580303531770534	0.546076487709676	0.532254908268941	0.592579187663487	0.581860158496814	0.54827621582842	0.554943477711501	0.54377562541439	0.534952838079116	0.56791648565268	0.593712193756544	0.549539874195685	0.572368721066375	0.605646790371495	0.582947645475077	0.539052906186893	0.582876815595414	0.627511453165736	0.544009688057129	0.534558162221219	0.52119103361728	0.558485239778601	0.51133843934606	0.508156885503435	0.500388136736758	0.546642786773395	0.550806165167966	0.506286310936912	0.555705329094589
0.824162974778968	0.693698466142948	0.645715807377311	0.524217393739721	0.671299462691654	0.633468140458241	0.634869818321319	0.629670413642878	0.654595183644097	0.625873296482329	0.7012170142256	0.747191901698635	0.736101617402216	0.793497904328242	0.706504431313508	0.6524797348809	0.658260944831212	0.609516859806592	0.547147881000154	0.539016741634536	0.597048040075453	0.5456955566098	0.585029311587406	0.511138100656393	0.590425184003062	0.571391269340414	0.531303595112454	0.5766946327004	0.575241855058299	0.570498584755556	0.625998332465834	0.544442198635536	0.549997115426709	0.600414613332784	0.539898894483985	0.555702347683797	0.596251843042508	0.567241615374581	0.513888888888889	0.518162770201872	0.52934851311894	0.519619191276377	0.511676406617352	0.51089253135572	0.617670256648403	0.535004060286381	0.576212240689145	0.508399596821982	0.579178886740974	0.570962993613942
0.579614468211161	0.654484196802603	0.729393114829397	0.572240656120431	0.649085125333895	0.660293544843054	0.725182331290114	0.576077867847749	0.724354733753255	0.757183132768708	0.674528583704084	0.64793615786561	0.64495823573699	0.612798707878962	0.601306413584339	0.760433359445872	0.678814044186498	0.721203107264402	0.681357551193558	0.608862595483838	0.530273878473353	0.590199263304479	0.553426135237447	0.535962481404736	0.57730331685213	0.563018862012159	0.610566509780489	0.544124975762681	0.550408393545274	0.545329490544088	0.599043541149869	0.553654205105325	0.595744945609888	0.558443156991051	0.553453876762776	0.567332739779414	0.581998765753052	0.557862318836364	0.613254294119828	0.549982679680858	0.572968128115891	0.515684461770184	0.59204313415926	0.505128831191521	0.576265538451416	0.508145617048322	0.513985982867112	0.567352603559399	0.504737674835477	0.500858003657109
0.649876452392501	0.614990729012371	0.692869504903216	0.658613939862642	0.810701480297874	0.610131238716533	0.711017844799443	0.647161814277279	0.594885987474034	0.592154695482115	0.60452244351136	0.691750711815501	0.752988622482865	0.668114516910809	0.716034744761555	0.561950400867105	0.710633396699973	0.582968145427546	0.599198414435248	0.673864580346785	0.583217690830349	0.55639764228062	0.555485883953461	0.564233200089961	0.562928671162622	0.565641184418306	0.550084130606546	0.606470518606748	0.549333799266025	0.538448384266555	0.551291786891674	0.615609428512613	0.665965282598363	0.610938602508717	0.595275990091914	0.541073646799275	0.557479345024917	0.550194592521231	0.550763891309923	0.594928485622092	0.540071231930573	0.587019231627081	0.488558611080621	0.492456053065317	0.516739394817136	0.55187518663139	0.521381941669808	0.534397135074781	0.543405231111812	0.554280322479885
0.710376635936144	0.670936077923814	0.718529164190539	0.746231854339462	0.727369658902467	0.680416302237837	0.615118806072931	0.606899515033029	0.718767185841403	0.720926891315435	0.722725032214325	0.622137425523096	0.607200386003803	0.629040586169731	0.74536296495726	0.638804987586708	0.798694726889775	0.715631833158231	0.613322753481075	0.617821376884888	0.534481459507639	0.554942599863483	0.588578696928348	0.561632646705063	0.626890597049098	0.618654337692305	0.554459808657926	0.552676738181064	0.55619316754828	0.555096577016842	0.640579356324422	0.564078883678685	0.548377817708564	0.581958731708492	0.529761502173485	0.566508681845823	0.570335853241262	0.633744158305861	0.553315064048815	0.559669485981609	0.518270832032607	0.566331274604	0.50625831025711	0.498143641519398	0.602484555857433	0.563221345126014	0.555006441903977	0.527598788030517	0.501960061132961	0.583983684272358
0.707768258489524	0.725095057344874	0.762788161342469	0.626035556576478	0.589886465298127	0.598596654470472	0.718488259134788	0.634215539177984	0.589812348297081	0.630796594566736	0.695928153945269	0.656767494571307	0.692257760065275	0.572571774688488	0.661837796508383	0.807487797318381	0.563089698104031	0.598733626361826	0.817027598814978	0.751862587999707	0.536095671713848	0.545867687320671	0.557056094042314	0.57176818740712	0.546867766019599	0.536987201159904	0.574795842784134	0.576411767944094	0.566127907932215	0.564835608112613	0.560208533034061	0.613576233086171	0.561061366900594	0.540947843857306	0.590430215532159	0.563309096000537	0.541175916677333	0.56242701409074	0.530847947577799	0.614454234983348	0.506105533487966	0.507621847310183	0.511158246136357	0.602661905232914	0.5789148747003	0.498173696458095	0.569268880806638	0.521031050220388	0.658725098904249	0.526157735526616
0.58560891258356	0.681695053252309	0.619108499698035	0.57458317581195	0.843951005724299	0.602551339718174	0.664387662014271	0.735046359937309	0.629995666471952	0.634299756214309	0.654185804651908	0.806200928160226	0.629774185806034	0.761358531845741	0.804372572610636	0.618442381969726	0.746459618880626	0.620657185163613	0.600204298771594	0.778151099259874	0.542321867227007	0.540405566824251	0.558156309698992	0.552886716806542	0.582390467190172	0.558898277202668	0.555411465638391	0.56785572410612	0.562416730905101	0.578392479505145	0.572694070760699	0.552480740066869	0.57605771976444	0.566956384468511	0.548968878106187	0.544897880630069	0.587696850466877	0.571009610855841	0.547476799685136	0.562767066115623	0.531850762034232	0.490724759489001	0.49580796740064	0.580399958462829	0.520661813763623	0.534420414899343	0.505968096023885	0.518887499429345	0.598874852627358	0.503387848628167
0.659514851718198	0.713278450646244	0.63696766102306	0.689500099318845	0.645230879480626	0.682699918983464	0.672921186286992	0.716319625131905	0.623499428684101	0.681501630745501	0.779852875312349	0.74093593403728	0.697565526589037	0.848087065111209	0.708991086915276	0.713958494695213	0.557593088347409	0.608081238636638	0.615773669334586	0.650998589305578	0.555964048878449	0.560922615805599	0.571276842710903	0.556512981031142	0.583178378077008	0.561174355223551	0.59723790716807	0.62099306899049	0.574998188929035	0.538926802283236	0.539173934657128	0.555365176709791	0.615110517355865	0.530275061901978	0.554479365675021	0.601185198922868	0.528658100168425	0.558303963188463	0.576806960135879	0.561867964409124	0.52644416349646	0.502058002915091	0.475660871400194	0.56063998803998	0.510627456607983	0.515724336710676	0.557694765284118	0.654386948323122	0.535239884964301	0.480340350660012
0.785133805266596	0.755551983626298	0.675337992441261	0.695408021903882	0.680389118103718	0.604612773297096	0.7279706177997	0.825589890721642	0.669755398732102	0.65405568981395	0.696664943240833	0.747657199090462	0.744647037054203	0.654372232246325	0.764616444806873	0.706404583516775	0.612757754486145	0.659688750113075	0.690112625544102	0.773412943674146	0.551972097456131	0.528434185604862	0.609112348058074	0.541631316151199	0.594374073676062	0.55680412593858	0.595194013020616	0.550485138835487	0.59254888707679	0.548803690029542	0.538160786566515	0.551461302682459	0.565982935793577	0.546915869559275	0.597886799395006	0.620133398458494	0.556007631441382	0.587453494119969	0.573016248726538	0.5594549499817	0.502104911725194	0.565971106441903	0.54603299535598	0.501860033587822	0.528176398670036	0.595708414336975	0.575638061341793	0.505693037204255	0.632066279291556	0.524078296445845
0.664247864694971	0.60615659555029	0.584615085757493	0.622916802282376	0.623613271628311	0.605122872298533	0.661897710852054	0.660408235251683	0.608982996533872	0.714760542612899	0.762328167877662	0.648469454807037	0.711266822485901	0.651837401747259	0.582365148508558	0.638387867827732	0.594796888729336	0.714464170785246	0.578526111022218	0.63201651593508	0.584357221724626	0.562161002086581	0.544135005964972	0.583183377797581	0.56494702410058	0.538044217499824	0.576187968004229	0.56443978178265	0.559966682880409	0.619133595441219	0.56547653076123	0.577934980299467	0.551221449889595	0.593539943497003	0.538753086558785	0.58266470645432	0.54367668167391	0.634415561728729	0.542020088352677	0.585814031085898	0.53649459625933	0.504051963156383	0.528244327038605	0.551302798250288	0.544439650154972	0.538297682424842	0.567716611234402	0.574744230781227	0.506511088367472	0.661128057645673
0.742563849070988	0.655004638708404	0.622045124506514	0.597689747100879	0.593658430884926	0.641321545995154	0.645811313707388	0.584507329824769	0.599076353042667	0.591269244646361	0.701138120732388	0.703835276931398	0.513889816304876	0.743523219789156	0.615975981593725	0.631465014179324	0.554459229739377	0.683561755310307	0.608086820568483	0.703757041321459	0.558090959038691	0.557175396541901	0.562238720535746	0.54694622918226	0.540768065640149	0.582263598235995	0.577472508059871	0.561087412858438	0.548303582047832	0.548790161775615	0.57696345810157	0.580921350407688	0.507455261194227	0.641078386017631	0.578716623534001	0.569494462010671	0.531814732795769	0.563061601599691	0.554928263730937	0.545927914710098	0.575239441333427	0.566110317295253	0.509743088197867	0.486541481741875	0.555594024901704	0.511021136576836	0.489055266332302	0.563086863238733	0.599137307982905	0.517548863773836
0.622826021125333	0.615356216729418	0.63381988624895	0.746990789367459	0.688991690274121	0.643664446205619	0.725544745214446	0.610911516103236	0.712919121396136	0.597294917741291	0.667084076259724	0.670165754330254	0.583367662291817	0.570708300847094	0.766073676261667	0.620109675934079	0.700433799016969	0.771383056522075	0.642964285741812	0.696324697000841	0.592598667396373	0.553484878373812	0.566203591719465	0.554392458920098	0.558737016651655	0.57737563652407	0.566156542664844	0.557928005847249	0.542511704487221	0.554879318256549	0.53944750648385	0.610061780096187	0.543535837619218	0.536686989457361	0.562504111878411	0.547201708939101	0.543359577923921	0.542603409594724	0.574921268875248	0.533752205575412	0.571086030739978	0.50166156991491	0.521452043539008	0.525612602541609	0.51312656986128	0.526780430115604	0.508719657854774	0.546488074776578	0.515858551123127	0.576297048758665
0.627675484228669	0.595477637656874	0.641821832251046	0.624665047347409	0.634186088934681	0.621078395509645	0.738811378896239	0.724004328302005	0.683300089991044	0.642677731475927	0.691488723894408	0.730882431573858	0.586633527277985	0.697347669837346	0.625098344330291	0.62918213349247	0.676679998486803	0.705038891098574	0.770169944871571	0.646479742769041	0.555454733611251	0.559423311312103	0.578003321862619	0.533259729152607	0.594462044644283	0.567961477193683	0.566077657640563	0.601919946299387	0.616146718472965	0.579652774270156	0.552457044221879	0.54879631321354	0.539653481142541	0.55710646000128	0.576131791390658	0.564939470827123	0.605698115024067	0.555699551823962	0.547341082088029	0.586093709483741	0.519939355511648	0.517919659164153	0.627876258042823	0.563793304454875	0.529147949903841	0.540173517712938	0.539340165776946	0.549334725753436	0.527357277071678	0.604495227136142
0.649396068475621	0.630449638939652	0.644264801724008	0.652441040076409	0.612756535621087	0.734183208340144	0.582621634046324	0.717462986366151	0.652905084004037	0.685214206615715	0.754650245939821	0.701199636358631	0.643671656055615	0.744679514260616	0.801569261008491	0.567680589396577	0.733742163987236	0.750537103789046	0.629768594152546	0.568943117739671	0.543821366014879	0.613767359959415	0.578692112515327	0.589302569939768	0.558070359616413	0.555405897347541	0.547984098880037	0.560030997806616	0.580939845454572	0.581904563977763	0.605781128953939	0.546455585578291	0.581257990836305	0.56161879205421	0.564894076106916	0.533639930871299	0.616661468010419	0.551398578086923	0.569877797366681	0.533364644175015	0.562545513967099	0.499674527563474	0.588868203386618	0.501834684810433	0.569327873404216	0.497717827309254	0.582157143808393	0.504381589301872	0.545943179071607	0.499811837454995
0.660923339828795	0.627946838585241	0.689084582460569	0.686513470109115	0.67422966785629	0.663227003746036	0.693981111961705	0.609913062832062	0.614927479453125	0.650875537702048	0.601787296597119	0.618168710868426	0.622361313700428	0.689983804327629	0.80669785655606	0.710370734588967	0.710341296036197	0.688684342843909	0.656444271718601	0.634724139636562	0.596248871117022	0.566459696975185	0.551752407757614	0.538946581467647	0.55717303586503	0.595210546981162	0.606216987006353	0.565447426761948	0.562273066875363	0.590367968603383	0.548781220606063	0.563708661106254	0.566252664775322	0.540472617124422	0.553521502288536	0.555491474922892	0.552966343736899	0.572686710886318	0.540987221111351	0.577467129795321	0.595010262624213	0.522365835913288	0.560216494586484	0.599287254044114	0.541554212283295	0.511091014623996	0.616348288672759	0.595161636962563	0.509822278083639	0.623624405135271
0.662385960521672	0.604275246482538	0.711433348653869	0.697451083591248	0.79245673815257	0.839487005925541	0.6825287675985	0.718359004118362	0.71002866392835	0.632888291927929	0.68556574950241	0.615893782245122	0.611270084379222	0.769916591024542	0.772394875053348	0.635699430219832	0.745913959917261	0.653771486672611	0.679339768656058	0.649423003090465	0.602494539399399	0.545723468380691	0.546533228390697	0.591887020169239	0.571807257518965	0.545101474243277	0.56096231641317	0.564778023243255	0.609700972024562	0.552438475490938	0.606088148410741	0.579059311898312	0.557574797415598	0.557203295443769	0.56571422043719	0.565746161255167	0.548727521871799	0.575483804832892	0.541390558061903	0.567203088375258	0.546411492471564	0.509387998101798	0.589806830780653	0.527772217234573	0.503186954825376	0.587032676180868	0.489769765386022	0.504354045433717	0.559666270009823	0.555882447648585
0.739573150488882	0.648739697383539	0.760847496271566	0.757541981260456	0.687431910391787	0.683929302980902	0.67541653153775	0.681041093936883	0.846431015566701	0.697310934037011	0.698596207566602	0.613561843693623	0.703861325859303	0.631595183741762	0.570635091332552	0.708950901208916	0.588375861489971	0.641360547694285	0.675824797818427	0.736722594907133	0.55937555854906	0.556487640182821	0.556966214969698	0.531031182995255	0.563393869834143	0.605290062773654	0.595740760780089	0.530432470386484	0.562126480511485	0.557056174127522	0.535910113016506	0.559178804397729	0.554873699448219	0.536130840611659	0.528323986783237	0.557851384015352	0.554455241321135	0.576979337566228	0.550917727328293	0.648918419667782	0.521744295766251	0.553420780832764	0.577700737669294	0.497460561908044	0.600639534414679	0.504243886158039	0.520071779754079	0.533616377696352	0.516950911624759	0.533302677073111
0.723960413350154	0.613110830910453	0.633642486081888	0.628089379719475	0.570702588848689	0.648151817066237	0.69358183130806	0.664005195301625	0.602442148958353	0.544473743575531	0.750296994350887	0.681372124070047	0.744626966919273	0.775374319771803	0.690681469532938	0.662425686365496	0.617703837720395	0.695552351498352	0.71594770326795	0.682149228390201	0.597178556188891	0.561487830947634	0.566770516686761	0.567522966329093	0.535405576376933	0.578324142437923	0.555592204309997	0.596215171542572	0.520147033774332	0.51697766931116	0.571178924561474	0.554095651069567	0.539106437045592	0.548967210921943	0.615276715605299	0.593543295068298	0.554669044712267	0.544401907718263	0.557529117065136	0.532982414373557	0.527684375555305	0.562231550995563	0.580176562499178	0.514309944472033	0.499975131154599	0.572959129544365	0.53625175417739	0.607034597793022	0.498688650168992	0.522843328135544
0.78874906401819	0.553490888747247	0.62888776584529	0.655840670671814	0.826264024347699	0.609300743486306	0.726004925453325	0.758146049820901	0.740209786630854	0.634726504706791	0.585504674638692	0.768556394066215	0.559847671004699	0.61009994697942	0.665253763793347	0.75995452239465	0.658984785430522	0.604251639189376	0.706393438960984	0.613301441180227	0.552338857075078	0.515203646849659	0.563016911734125	0.580726318470296	0.595058364896658	0.550185548859763	0.552647387328204	0.55620659790693	0.64967982942114	0.579656336309598	0.545934658945631	0.565120654854634	0.524077418024293	0.558583158350648	0.600596267034771	0.53451020819564	0.543850484573736	0.559503380042095	0.563794224770899	0.559483692453402	0.502725803922394	0.537084513614032	0.550064896267478	0.504732297019527	0.552837784303485	0.527229285705272	0.574303396498903	0.5112474491405	0.523719170590066	0.531295482528743
0.614485844181863	0.702742901434337	0.689361382783262	0.679604657977392	0.651547903308729	0.611562011751894	0.602052069885585	0.616779196805609	0.628943708654473	0.615688298705679	0.609144873941439	0.620920005202248	0.738886798363777	0.698642920239027	0.596208748206839	0.646089519840261	0.636866668010079	0.678480304963304	0.672207198122279	0.671434681288246	0.55660493325009	0.57457864799968	0.583104323775409	0.560651635540886	0.553301440222764	0.556199182810507	0.568254055591593	0.573278346267566	0.566045937202324	0.569773479705088	0.533069790008228	0.544967541436873	0.557493972565457	0.583671677443177	0.572881978394568	0.578322738770021	0.597993303016997	0.598247432033248	0.598601185371881	0.604645275246666	0.520614517755145	0.566239221587014	0.517201796469873	0.546406859787851	0.572325480827785	0.522069713156116	0.629876167151647	0.606704378619587	0.507251070207356	0.51786770103777
0.619044841842549	0.706978019323128	0.642958198117742	0.602564066798265	0.763096833139125	0.707112218003248	0.576106991458522	0.859792245377385	0.602344043473725	0.668271947613499	0.590896041649433	0.636964263125536	0.631903999679593	0.690118507738174	0.612443827969938	0.644702469166793	0.709881128933091	0.73426421458151	0.79735349429853	0.598640450618945	0.578567529291698	0.542102506615878	0.582769754775007	0.571778888115169	0.555593875754018	0.556526356226659	0.543038486810595	0.540788287921883	0.564067771765843	0.530556566892943	0.551758968672703	0.563962391083658	0.57057356057472	0.539811586241368	0.562206109874053	0.576245603819935	0.623143362538081	0.559866975042438	0.580518919575864	0.554019668504544	0.516669815494769	0.544641068969531	0.534518757808431	0.542833615457406	0.539455011815836	0.565781391162331	0.550283041535993	0.471199607955138	0.502882201350802	0.502805416582318
0.667879606067846	0.689913293548357	0.700279551463146	0.68870502017154	0.606872673960359	0.648612310291033	0.5806465005855	0.686052610947647	0.579742861690237	0.604256692245886	0.746580047548184	0.710984607456079	0.624972726857739	0.71600860400471	0.661372166093566	0.723279435748006	0.622701338322634	0.672726177395897	0.682943383376421	0.689649692102828	0.555109424709881	0.620983712068202	0.581921356733087	0.539919203645077	0.544826910241261	0.553312167770836	0.54336507576838	0.556467570853752	0.537532141044335	0.559489696142118	0.554982943729711	0.553040569118932	0.563789011834494	0.556182127069877	0.58259976344929	0.542156650204403	0.571145559318781	0.600675907525135	0.558336563276209	0.644295089909084	0.547710060030779	0.552104381998697	0.58300866818977	0.477676211453247	0.568863942759572	0.509174918647231	0.551721024607848	0.517426562197785	0.504506672094974	0.532293471770273
0.599623461569577	0.559903226925948	0.629943012090456	0.674412244947581	0.599181463808635	0.590260554244384	0.85502066118691	0.610702732007606	0.715818936069107	0.61004706723337	0.736223706949029	0.616812115436918	0.694408432505445	0.830354999314999	0.738440136945473	0.69339773696177	0.786576304463253	0.689188927160591	0.77664675096031	0.662058081779011	0.546325916175318	0.540203004959074	0.577275858129422	0.599510164770688	0.565602584355374	0.561869955547898	0.583428999466647	0.550081773675408	0.563722523883457	0.534174598434078	0.544582524815469	0.563798945030797	0.604791894654044	0.541330267757725	0.545182090105443	0.600995897779865	0.550283556051213	0.601889240036483	0.546443800138414	0.537242955985577	0.563631230475297	0.503954471822153	0.528352479310001	0.514196605837617	0.600335596108242	0.56627040476482	0.52623656475048	0.527883116242386	0.519826820698814	0.526219073006763
0.633972534519296	0.595321627060549	0.744214348069885	0.689816363001703	0.706536089338895	0.640661218266451	0.607904689826212	0.564146914627312	0.684614369287163	0.611680253994509	0.586011538005994	0.617160764181211	0.651585425703644	0.770815400331038	0.754551303858679	0.637265030880332	0.632845161316402	0.730367527691619	0.689007689559684	0.671536939747478	0.56996944133241	0.550697288667741	0.57394810101846	0.548515737801378	0.557329239977135	0.568780210600537	0.532414649051391	0.532346008413937	0.573939330479718	0.554948921978517	0.548191939954153	0.566678395846232	0.579049921348559	0.555241802155129	0.573085541406983	0.545957601325669	0.569918062480969	0.596405574854243	0.615640489865095	0.608672631598461	0.578485845309378	0.521714910765452	0.500085433966847	0.655793161875227	0.503532093860673	0.595931304595146	0.509050919568387	0.563823865820177	0.509741635982717	0.494549437895892
0.667985341316556	0.733297700256576	0.708969772460795	0.677495906362208	0.595447708784375	0.612144824374752	0.677517095495567	0.692487342078496	0.597648734691107	0.725802582122859	0.64318975470677	0.780906411123753	0.808166030277207	0.803207220467718	0.704714663610007	0.633507736157014	0.685358944514489	0.761193022807086	0.631660879953001	0.644670809901685	0.591883582795785	0.570462938875858	0.624564464145863	0.567565726453606	0.542184370997101	0.557541014674611	0.562055516525591	0.540695895791644	0.542517668286577	0.547860461530187	0.58381631922501	0.553067735808802	0.547528101413758	0.552620306157422	0.559031254097971	0.586876300097057	0.547778277861865	0.610805263043006	0.569372357120509	0.616009725070098	0.575226060729345	0.65141620830622	0.578163365023133	0.556638371298931	0.576757197807853	0.505097802474819	0.520336631672066	0.579840656511812	0.559934727718941	0.502088527476769
0.609739159100399	0.787150968149982	0.605832776291551	0.795939714987767	0.571908825073281	0.608566917442676	0.716803662030418	0.636737672863791	0.691683088535438	0.664288557360912	0.750099927290889	0.626893268604809	0.79462719448397	0.652920513247693	0.627732703972465	0.602778920276711	0.744107068691754	0.555165012583703	0.821304506605522	0.622661729833282	0.558118207677176	0.532423401679352	0.55557492131889	0.550115689605057	0.54560892953697	0.538952641718585	0.549221781262309	0.589197759666875	0.58123428856427	0.588525657724292	0.608302231879262	0.574560339920982	0.580049543173672	0.540358273246526	0.566102810336021	0.54271354377426	0.561907670418685	0.533639583200643	0.543564914019765	0.563348678200039	0.547247461042148	0.492306100543634	0.512268999422299	0.50965312803723	0.542859145175343	0.589250321566767	0.524490753244395	0.540919198478676	0.505790950732947	0.532858795875791
0.649391897880064	0.617972552979174	0.786041431449739	0.66150266370888	0.707257835511418	0.656272385270486	0.579309786856835	0.668595544233878	0.708743556433817	0.629953141309711	0.579640393104344	0.709310872167917	0.701939480733263	0.623601219364797	0.605378388448844	0.740182844904573	0.684717255197911	0.669327492671468	0.686453819286777	0.511822467484457	0.58956373556069	0.556530707547194	0.585867238160866	0.578853451802379	0.561621820278457	0.538568397878343	0.535443586669219	0.601989262897264	0.525681526611286	0.552446631069828	0.54631037443901	0.590427165981146	0.547419484424081	0.562008395886781	0.5698590388761	0.566648215675423	0.605027396060096	0.52602138638127	0.610823956817337	0.505496661135682	0.580163214969328	0.56893314519679	0.512035027316669	0.530486284801492	0.511450015823345	0.574584125413654	0.491010697815623	0.512089046335875	0.487369465228502	0.502886510812872
0.68351858909831	0.650421237062046	0.595490818372645	0.566124338822095	0.726903799692481	0.728225278565194	0.656009838174411	0.790098583355997	0.698303576520603	0.621200662126298	0.634745403553869	0.672471625285905	0.693171359612179	0.657645859697501	0.578539849303492	0.611912856109548	0.642017521997175	0.679933502159572	0.649526826047059	0.727122091044921	0.560399618600853	0.537903310923442	0.541271476109047	0.530410510604343	0.589604461060408	0.565680182533743	0.589333650556553	0.563147342699292	0.5731664890503	0.562392249670107	0.576234238034685	0.601823102532846	0.546855012959256	0.542918614540631	0.561258653600228	0.525581106484419	0.573953751356762	0.627914362475423	0.577454813513167	0.595134322786801	0.502922041167014	0.501349556142831	0.519328959073601	0.561014500331388	0.541864390826956	0.54839993236874	0.504824491920874	0.553083535676897	0.623106267144842	0.490377955232023
0.643561787870259	0.566904832503902	0.533011990595192	0.716660654796353	0.668911240572013	0.617659730511596	0.772724407595655	0.757686801972643	0.723438990363153	0.613905273409522	0.72210680002501	0.837074110177047	0.770479403999867	0.621687447136456	0.634731197138954	0.69187266000056	0.622689452803462	0.722351714648015	0.56844569502404	0.579815707554931	0.585908371515919	0.551365885043101	0.513481518607327	0.586094913168683	0.589062932717466	0.556247331136053	0.589737737371149	0.563518379087544	0.538965664443664	0.562119916158452	0.560713245002253	0.575369150634826	0.569434519322073	0.541474814747681	0.531433374130027	0.560789724729301	0.564887624744445	0.550653474831742	0.53437759314941	0.536164106800583	0.531474994476363	0.567771056281422	0.516250070153148	0.514871444941802	0.558087017702	0.606432948547541	0.537045486657561	0.519223503130174	0.496131662994689	0.527550983813622
[truncated: 30 more columns]
