# Supplementary material for: Value signals guide abstraction during learning
Source: eLife. 2021 Jul 13;10:e68943. doi: 10.7554/eLife.68943 (PMC8331191; doi:10.7554/eLife.68943)
Supplement: Figure 2—source data 2. [file elife-68943-fig2-data2.csv]

model_m1_b1	model_m1_b2	model_m1_b3	model_m1_b4	model_m1_b5	model_m1_b6	model_m1_b7	model_m1_b8	model_m1_b9	model_m1_b10	model_m1_b11	model_m1_b12	model_m1_b13	model_m1_b14	model_m1_b15	model_m1_b16	model_m1_b17	model_m1_b18	model_m1_b19	model_m1_b20	model_m2_b1	model_m2_b2	model_m2_b3	model_m2_b4	model_m2_b5	model_m2_b6	model_m2_b7	model_m2_b8	model_m2_b9	model_m2_b10	model_m2_b11	model_m2_b12	model_m2_b13	model_m2_b14	model_m2_b15	model_m2_b16	model_m2_b17	model_m2_b18	model_m2_b19	model_m2_b20	model_m3_b1	model_m3_b2	model_m3_b3	model_m3_b4	model_m3_b5	model_m3_b6	model_m3_b7	model_m3_b8	model_m3_b9	model_m3_b10
0.488328127773458	0.645522658217844	0.685256285452704	0.666829013906107	0.703437696757731	0.740631230509535	0.676635463368982	0.701047505126702	0.726016757424985	0.769447421819333	0.749656627719922	0.612156422476232	0.694039901204151	0.75953259294428	NaN	NaN	NaN	NaN	NaN	NaN	0.49342786534366	0.616441064180005	0.559553046600398	0.595487616241622	0.551692036947474	0.562742609077964	0.58552529143646	0.549766164456295	0.553567728871027	0.553429989000288	0.57455713463313	0.548074264513796	0.54979395178983	0.55677118899971	NaN	NaN	NaN	NaN	NaN	NaN	0.498634730387958	0.49670526850794	0.642255586009363	0.536611719252147	0.506371635893234	0.530559871040494	0.655012303058545	0.506486538187103	0.535314571967675	0.502010680708003
0.651819521673733	0.774676895964921	0.73041432933052	0.63360493909623	0.746302703648974	0.768329422364189	0.796027720722191	0.705148540768366	0.585521468987336	0.620466626671353	0.814091820855749	0.730584143497463	0.702947003482781	0.724262074531052	0.632686137919181	0.759889296509576	0.716482226095089	0.682349441962492	0.685712777312193	0.789090141827071	0.612351920271358	0.558258659825483	0.601645167786099	0.570241664076759	0.54264376225583	0.566847830683173	0.546579400325093	0.562410466257979	0.557758939815745	0.576123371999412	0.550187120893424	0.605614165283262	0.538238209616938	0.544391866089447	0.573738707733383	0.556135260743607	0.552916534067763	0.566817984301453	0.544951289434765	0.567275448054072	0.619989405295792	0.490876328209218	0.595328374497881	0.517630694357135	0.490508844497625	0.537260262725253	0.500019506267821	0.522763783357318	0.586516136470618	0.572608966742049
0.753057895343101	0.529232800176961	0.733327079268481	0.713270428973807	0.758444463938851	0.646869610579145	0.593150250005606	0.721839468158384	0.636785440480535	0.793687432633059	0.736938029322874	0.757995915718216	NaN	NaN	NaN	NaN	NaN	NaN	NaN	NaN	0.548581877706823	0.520493429513039	0.546267173427673	0.561840521178995	0.566941544590357	0.614303614204091	0.544490266234895	0.573731558090083	0.559584069678558	0.530657808242747	0.549102005476989	0.573456999006662	NaN	NaN	NaN	NaN	NaN	NaN	NaN	NaN	0.513844784344272	0.522260945749247	0.492149760501989	0.480161664402778	0.661471782339427	0.673077095386054	0.477721219811831	0.508537527240991	0.50614259826094	0.521496614545055
0.586337731612899	0.777501371965697	0.663873059182734	0.514328511545925	0.645789642371944	0.588786937129084	0.545304517465017	0.564043491738779	0.762939251631674	0.670963269751383	0.649110087223732	0.588545475046416	NaN	NaN	NaN	NaN	NaN	NaN	NaN	NaN	0.566976776755334	0.559446151984216	0.625844291699966	0.508186799017689	0.535275492778417	0.527934883312616	0.535727245849136	0.524191217660255	0.540694518259624	0.542612087856926	0.513484260216744	0.512707669583199	NaN	NaN	NaN	NaN	NaN	NaN	NaN	NaN	0.528348897206436	0.498513632524313	0.590541758799954	0.487360146594138	0.506361902231966	0.493418232624379	0.528643772570831	0.507019118127592	0.610195819429407	0.499844380314416
0.498137431406468	0.538608835601493	0.684701906589404	0.679641286057236	0.791308751264188	0.61815989031209	0.641860262724196	0.660234714840445	0.573035859347697	0.71789508243839	0.594821426390743	0.697855512522451	0.732314207213871	NaN	NaN	NaN	NaN	NaN	NaN	NaN	0.498465406790922	0.533782790268304	0.570599386002868	0.536653262698177	0.531508714630433	0.568452859375834	0.578282684683903	0.521151719025556	0.538217558888706	0.520996309214676	0.557956697331889	0.546254732890953	0.560901616395868	NaN	NaN	NaN	NaN	NaN	NaN	NaN	0.498690654365355	0.505172213098832	0.575907153630234	0.48334526946363	0.495602418920921	0.556000821615364	0.613415624648191	0.532275392210811	0.481982618072761	0.497861709995162
0.690478263047432	0.572301575547528	0.731494509832368	0.795708330683432	0.740390369446991	0.716500240043059	0.761900137243601	0.638146986281276	0.687942714901233	0.778845672612651	0.695193640349325	0.718754228022389	NaN	NaN	NaN	NaN	NaN	NaN	NaN	NaN	0.626949633142931	0.555888364327946	0.581932555750597	0.54626493085874	0.533926525160108	0.556052535273264	0.557034703930346	0.568936653455763	0.547512078371904	0.556882736053152	0.582703625967145	0.547920866731604	NaN	NaN	NaN	NaN	NaN	NaN	NaN	NaN	0.575814817937499	0.561022955052549	0.498958175604643	0.539782950162775	0.497735465258506	0.513182626506582	0.497437392530463	0.564862057852501	0.505839758376211	0.519623448043904
0.751947927613013	0.491258425251516	0.746718686902554	0.719390847319985	0.647650488777828	0.804581039951412	0.703784572623807	0.720740693700029	0.648225791434037	0.729196175548854	0.79110618985573	0.669626237112576	0.754042182241527	0.759658810030492	NaN	NaN	NaN	NaN	NaN	NaN	0.514260652959924	0.49473637640081	0.541449163292196	0.560281507546456	0.581362573210656	0.563433756023647	0.533721924558938	0.554237580158731	0.57756563008125	0.566397425778877	0.551748319988789	0.544931073852916	0.558061038106822	0.579546077867503	NaN	NaN	NaN	NaN	NaN	NaN	0.499168371927538	0.500121795294233	0.574692247303846	0.508577025439144	0.600179027744094	0.514569048858146	0.4880379919969	0.490798622999019	0.494702134366356	0.530687315535849
0.778657479681049	0.724995560033754	0.566678994058983	0.736233207934346	0.59323734724149	0.729182972778593	0.695231619239005	0.720726955775106	0.699240916037127	0.680691631954678	0.792027386928547	NaN	NaN	NaN	NaN	NaN	NaN	NaN	NaN	NaN	0.532256708583411	0.528533740164943	0.550692626167603	0.54013327173315	0.541348229798147	0.632471182465138	0.528430379858929	0.531854912466615	0.544130530192206	0.620450754230402	0.572895488658466	NaN	NaN	NaN	NaN	NaN	NaN	NaN	NaN	NaN	0.613870168828075	0.51070151339735	0.506190789471127	0.497737895065523	0.530493069775995	0.725615896888612	0.501329383255015	0.51815796858411	0.536142579076925	0.676418588133465
0.645480226794153	0.747723534376387	0.749634763275539	0.839924078322152	0.781723877913462	0.73794070325797	0.811820266592115	0.690936729937408	0.5437019124588	0.703069532752377	0.737892623939364	0.762332861410949	0.711253862903627	NaN	NaN	NaN	NaN	NaN	NaN	NaN	0.615991604984189	0.570175110936137	0.585859367019554	0.537613922034953	0.575879869424616	0.556129609160999	0.602488335081792	0.537084013848049	0.526698612591985	0.546738759957886	0.532902523018545	0.52126095694916	0.555667968148718	NaN	NaN	NaN	NaN	NaN	NaN	NaN	0.67221762959037	0.522697712337288	0.532505794418534	0.49495648129246	0.571609082592159	0.492936617189979	0.5212027050536	0.536036096714983	0.493751443639576	0.525486449585583
0.698086913297951	0.600050828526619	0.68277942062262	0.755689829437056	0.728228453870977	0.693680918269224	0.663442209584568	0.742864294453221	0.693478481823699	0.727479170207315	0.702800900439575	0.706534425632838	0.717575681779393	0.603388967946868	NaN	NaN	NaN	NaN	NaN	NaN	0.562598219914249	0.576172751282995	0.538727796603166	0.543799780964984	0.560250033672642	0.533012748098276	0.582287822582774	0.537098264192944	0.538537954820801	0.530968059250118	0.55010522264779	0.577953968409566	0.540103018523582	0.54883486599284	NaN	NaN	NaN	NaN	NaN	NaN	0.502581328002179	0.502239356508004	0.524969887113081	0.574074624239041	0.508136588176828	0.493409039768685	0.597123214723455	0.490985808338994	0.482526977254577	0.471575045265865
0.714434393059687	0.788437331576906	0.795810528596835	0.683819094102089	0.602487163657751	0.746560826924964	0.73826939909407	0.619286246852135	0.748964111466619	0.722058735805196	0.708801395416036	0.783934148678461	NaN	NaN	NaN	NaN	NaN	NaN	NaN	NaN	0.551673449224415	0.53734277187248	0.548111306013065	0.517078077373287	0.540188146120133	0.555798009817748	0.547853200994775	0.581535135430605	0.56463689470258	0.531952620068951	0.541908035744825	0.606275409248084	NaN	NaN	NaN	NaN	NaN	NaN	NaN	NaN	0.561802079107349	0.513055492059296	0.538213036340459	0.490410745230472	0.547266870830069	0.518802761825125	0.481766437074166	0.619867100143745	0.510509663206397	0.547252397526468
0.714401239124437	0.716416966397482	0.791647776564456	0.715161207278938	0.743619166390926	0.695581036782506	0.710893168844916	0.759522461462981	0.736422191860901	0.611462011260638	0.608882342347096	0.757337535134282	0.726138129030066	NaN	NaN	NaN	NaN	NaN	NaN	NaN	0.555525824796921	0.542691420770113	0.561349129871601	0.544168005893842	0.567404021519402	0.678862165342711	0.540490653970717	0.539632256587943	0.550484275077523	0.558500710015493	0.545246139718075	0.538165369371834	0.535189779947636	NaN	NaN	NaN	NaN	NaN	NaN	NaN	0.575046904294227	0.500707522780059	0.490493654212116	0.505324803032254	0.508702233823303	0.518987592278761	0.487576887650848	0.527708075936049	0.512379960923722	0.532345125090371
0.708371021477153	0.67568893581274	0.584806702908824	0.672986771153016	0.627686735890352	0.668683654569694	0.74387806255647	0.614624449472143	0.778332199013788	0.63337168852986	0.70173573951992	0.770386888022867	0.757657784441272	0.782026370950028	0.680267690781643	0.780080502493605	NaN	NaN	NaN	NaN	0.558490822338771	0.599478142792566	0.520571319640342	0.536114399762703	0.561426284772055	0.593387142985505	0.552326669205957	0.586831663200932	0.522653280294867	0.567508733170206	0.532234753542396	0.549809831190157	0.569324595076329	0.551942119281239	0.543558645728694	0.54162093839314	NaN	NaN	NaN	NaN	0.537020218882052	0.570754443829931	0.501510389934519	0.57384343618819	0.584163209580227	0.511661893920825	0.557783215580042	0.523907922862472	0.493055539596507	0.595643890277269
0.684870407629144	0.664111178757468	0.71157469411985	0.686445826114672	0.66989781707572	0.733242681381792	0.74268806862292	0.705172212207974	0.737363695633045	0.74112057653205	0.748978608787218	0.783856960773345	0.684048200419893	0.777524834130032	0.818326001782427	NaN	NaN	NaN	NaN	NaN	0.541303978462499	0.548227519010503	0.55400022789011	0.547895046498267	0.53232330705695	0.569968268371211	0.534515540406054	0.523273384509585	0.578197046878582	0.560393875135975	0.548081979111531	0.539238910262245	0.527105818850679	0.530416401175363	0.565954873079735	NaN	NaN	NaN	NaN	NaN	0.502712497523618	0.50497084621921	0.578592939559596	0.508706821995093	0.569919491963904	0.579279876439885	0.495582872499114	0.520722201809424	0.517510451188288	0.522598662304645
0.641104080785378	0.756226507051797	0.533700116147813	0.752053910027799	0.746537975375776	0.568525958213481	0.706690345513217	0.773551515574251	0.660815642952217	0.70307375871218	0.75384124623237	0.711374408122832	0.548278497976569	NaN	NaN	NaN	NaN	NaN	NaN	NaN	0.604527848590343	0.544325738325234	0.535283396674759	0.553240200318038	0.545342034867197	0.55124494190179	0.520223315781576	0.549407208470091	0.636936053677625	0.529487829797533	0.576001551879853	0.560350733998445	0.527931994223884	NaN	NaN	NaN	NaN	NaN	NaN	NaN	0.617716667329949	0.526106763405567	0.518957960080027	0.541514034877258	0.531559283721021	0.582294377011848	0.482945730361033	0.496857313227976	0.665457693400573	0.478403704980281
0.675296353813812	0.750828921846922	0.664401027616625	0.715412149921399	0.569893881121133	0.652360286166683	0.713530875879182	0.549592724834467	0.554050988862848	0.73812914320375	0.722592836514486	0.730947070582799	0.666794977099733	0.67745157120213	0.718913807094414	0.712581328290655	NaN	NaN	NaN	NaN	0.53542324703222	0.536878620528409	0.520031838260598	0.560402332320264	0.522126508737826	0.532620149396874	0.5418281235548	0.531188352560993	0.536105662246105	0.578240070616769	0.536385595375327	0.552407929822537	0.502282918027507	0.55912776995909	0.575325291710972	0.560833247374357	NaN	NaN	NaN	NaN	0.489051590103539	0.503617885041392	0.507554664879366	0.544461336870889	0.48113432474216	0.481114479667132	0.505575999349996	0.500672565912118	0.526400070820501	0.576533581408584
0.505540628429858	0.680433146872776	0.660961363244977	0.68537547750905	0.73341718521829	0.692125719306769	0.765709272758255	0.704927865410668	0.698989318396559	0.72501026658563	0.717290634818925	NaN	NaN	NaN	NaN	NaN	NaN	NaN	NaN	NaN	0.504808789315362	0.512692563454776	0.624001300871707	0.612297176821263	0.545512085452442	0.538235644927288	0.573655296653342	0.542834274127891	0.560317835607509	0.564837478225231	0.559191544183038	NaN	NaN	NaN	NaN	NaN	NaN	NaN	NaN	NaN	0.499815790935656	0.530826884731836	0.644016904190126	0.489728385984702	0.597189545609964	0.536665807816188	0.53089617744666	0.558640823081277	0.514399394191784	0.499560214355109
0.605312105106292	0.738097464893992	0.724337690938207	0.724659424829523	0.797790298530623	0.810261562859344	0.720193319685507	0.586950033861817	0.691358326520825	0.695098654645468	0.720423562159855	0.684370118887934	0.703750474512816	0.70657548213559	0.645366127574172	NaN	NaN	NaN	NaN	NaN	0.588475521581987	0.544643310154286	0.57017760784398	0.536184593858193	0.544857311785691	0.550860624421082	0.564083617447337	0.570777974978107	0.54777161314868	0.547908668347603	0.526050977925761	0.526738084523328	0.581629187718265	0.582754991290892	0.612643681053781	NaN	NaN	NaN	NaN	NaN	0.594309593786038	0.563709657305136	0.520629761686462	0.50759206886222	0.56274921555083	0.510728618597136	0.52360751187151	0.537694537880307	0.510539099729926	0.510057119217265
0.633145632413255	0.607651672371515	0.738937791733117	0.643623038518809	0.771582145381048	0.556903698204035	0.649322703751205	0.785907933166949	0.540828023137509	0.599836313778615	0.706870542294969	0.654224308621135	0.679073167270865	0.581701423707295	0.705529336097815	0.612286890664097	NaN	NaN	NaN	NaN	0.600498441892582	0.554648168377497	0.562329733992653	0.566157843739425	0.532447795402903	0.539600690296143	0.570631396755465	0.558596303262767	0.516781816224259	0.539880109682939	0.547245189137685	0.61377582693764	0.548961321461705	0.535023911196199	0.554829909212978	0.58719985052624	NaN	NaN	NaN	NaN	0.504360926209799	0.498599278209681	0.677170982375699	0.516802300799068	0.575831918002872	0.510999047456902	0.58378419526147	0.585504609781034	0.490392657052592	0.492624792157709
0.633592136226824	0.726685897363403	0.581066383484614	0.703867400903192	0.762502512283151	0.794914304165464	0.672906111932452	0.700213468890301	0.538583055182765	0.598139852727474	0.637162975957396	0.574207185929686	NaN	NaN	NaN	NaN	NaN	NaN	NaN	NaN	0.594641094444612	0.549653392309127	0.528974143474994	0.651796797811233	0.564673695832081	0.573352003526839	0.544972078673068	0.540267836639591	0.507838270692377	0.54343269249348	0.585573142334962	0.540626063176071	NaN	NaN	NaN	NaN	NaN	NaN	NaN	NaN	0.57600547351734	0.5892279016283	0.480491701545299	0.634505310257641	0.491563217172753	0.540799218554619	0.511826980818082	0.480299574999101	0.477424668576849	0.545831402971376
0.695610573961115	0.612717148971386	0.595739829623441	0.725419674166766	0.633257569336665	0.718506193243088	0.612186432721177	0.595484290946133	0.604078255572601	0.704805208780859	0.593821589550748	0.742405080382387	0.618918173542729	0.675004278451982	NaN	NaN	NaN	NaN	NaN	NaN	0.570700599168865	0.613021741250146	0.565884800405247	0.543732038099508	0.555631443498732	0.567402401122047	0.589579016533495	0.54488944830366	0.550321794209384	0.549281029864918	0.53769558894879	0.561051988240354	0.564314764074762	0.543333665791874	NaN	NaN	NaN	NaN	NaN	NaN	0.557115928678827	0.528019968492614	0.560376301011172	0.625627131454122	0.52791352528121	0.524568643132545	0.513299128483091	0.506617522383676	0.582799805172584	0.522529669662736
0.806217870463059	0.607506241917591	0.569017635216375	0.730541479009633	0.691239987033503	0.689481113191591	0.783859224452739	0.813664345658667	0.689571222370731	0.686250202876386	0.617934954131483	0.716120334188273	NaN	NaN	NaN	NaN	NaN	NaN	NaN	NaN	0.551447717405609	0.596910235502344	0.535326549308146	0.549597008895659	0.551603825192679	0.542275330125258	0.571022992617738	0.552843752015386	0.551259890604043	0.536594228778289	0.561104297129373	0.555216182028152	NaN	NaN	NaN	NaN	NaN	NaN	NaN	NaN	0.499858880257866	0.53117220009824	0.489742227194327	0.517880891685055	0.567995915045966	0.495892182191308	0.52310988875404	0.541804816665829	0.504601266205677	0.494840164490684
0.711432595721675	0.711721964837463	0.609390554155333	0.741626305511369	0.771504903108435	0.74439597179964	0.616326887012637	0.756607583360903	0.648062375646854	0.608107420020138	0.74829491770716	0.615070964342429	0.633235466974864	NaN	NaN	NaN	NaN	NaN	NaN	NaN	0.553153049603135	0.5560049813495	0.554489829419988	0.548381437719891	0.560876395516159	0.537196059029039	0.529354126534572	0.540934724178427	0.601891429126161	0.52844261030252	0.564963417265218	0.558321673087071	0.55593825725085	NaN	NaN	NaN	NaN	NaN	NaN	NaN	0.494071727283974	0.536974564487016	0.508563149020865	0.52713025156836	0.770616302166576	0.590828110765447	0.50077625980668	0.614479011204708	0.575681743524692	0.50906638597756
0.727446150081115	0.645224063799754	0.815211182486452	0.61132621944526	0.715875830037505	0.706049395019998	0.738668690364486	0.673138566430915	0.754107405559086	0.716785560758538	0.665985524047603	0.545315509808876	0.623507591563372	NaN	NaN	NaN	NaN	NaN	NaN	NaN	0.569364616594701	0.539496823805703	0.537452159477689	0.547992744774497	0.553461733873087	0.542876921777452	0.571226920777695	0.537033548544525	0.549486541806855	0.57423300053383	0.524726717348521	0.535155966660948	0.574987886342021	NaN	NaN	NaN	NaN	NaN	NaN	NaN	0.63509527152675	0.510299080591205	0.572386518157459	0.565976689372601	0.637663390115926	0.49575869389289	0.532210489055335	0.496595075718284	0.508230188557265	0.502674023283535
0.777623865913835	0.616980167487213	0.621596661875861	0.836468070288124	0.651643337373624	0.722711475401131	0.678853454726692	0.553869804028341	0.653415616160795	0.689612981919645	0.752509665461504	0.741120096000581	NaN	NaN	NaN	NaN	NaN	NaN	NaN	NaN	0.546869584428574	0.531387584984048	0.536147265240565	0.532458562401292	0.559227480934174	0.537501506614303	0.579334788038467	0.536829673032242	0.520095906474484	0.578780727544307	0.573431374019342	0.57602202878489	NaN	NaN	NaN	NaN	NaN	NaN	NaN	NaN	0.488968058162085	0.50604502262707	0.544491710954103	0.481628869682847	0.538296442511612	0.57550711952212	0.493792253018282	0.505963594353444	0.512241116511376	0.499638433046106
0.747602246968763	0.707908093816911	0.745811849225156	0.737445838111116	0.676104632088829	0.797201627571877	0.709133912183068	0.73303556205091	0.744053738107663	0.629239444514637	0.754503315971188	0.64692812137233	0.675875604493941	NaN	NaN	NaN	NaN	NaN	NaN	NaN	0.544616296131145	0.581308810887255	0.543538523895494	0.551299656379576	0.552229807566951	0.549192693133276	0.54334561424169	0.554776893653659	0.565361326618582	0.542356452785443	0.565085490268804	0.523612578788482	0.531508980394569	NaN	NaN	NaN	NaN	NaN	NaN	NaN	0.501984425869268	0.499627676712261	0.575216229412562	0.552504941655239	0.513267960826193	0.507284300036556	0.549905640590073	0.590534715187304	0.515417501931107	0.518669551713005
0.778398604092729	0.710269606434534	0.691226524595083	0.686411598404903	0.787371707458476	0.7140811646493	0.67783422192544	0.727578374072142	0.707644027235338	0.804102793397231	0.712558268757828	0.717325810966367	0.565013216795006	0.817927493973008	0.797669240290698	0.718461155909101	NaN	NaN	NaN	NaN	0.5650031290316	0.527741547683531	0.522441586524223	0.558897529997529	0.565797714246924	0.522967857250674	0.552870389939258	0.538094035096559	0.534804535446106	0.551472079887663	0.547576010155603	0.543320098363505	0.542719895798065	0.531185145670273	0.534346774873777	0.550720065931422	NaN	NaN	NaN	NaN	0.502204396847372	0.561080952332497	0.504359599278586	0.520448741292855	0.602140122938234	0.52462480156882	0.525542551252939	0.556699474698501	0.493085977738363	0.555940055103525
0.632183155836008	0.728798724592309	0.669181908392824	0.66974388198893	0.693988766928133	0.721631401482396	0.776090856996559	0.624059155481648	0.677615007085423	0.680626374791192	0.766101908088469	0.745724525589757	0.694182804246299	0.714841526684325	NaN	NaN	NaN	NaN	NaN	NaN	0.575826144402056	0.539033675748491	0.532253909405237	0.545939333780674	0.605769255548938	0.54476201391005	0.573793204544523	0.570387025482234	0.539735033267911	0.556140549022896	0.57109035549888	0.563762394991934	0.641329540043221	0.583625642403226	NaN	NaN	NaN	NaN	NaN	NaN	0.497703910365617	0.540625469557439	0.495422652350935	0.517256960796312	0.577039380353622	0.519734724549112	0.50498370621701	0.580019165902457	0.541721287473582	0.505443213389089
0.699359991255128	0.738852087431864	0.610849440136865	0.672213464803131	0.740945507947516	0.773420630988622	0.725540169249901	0.722709571327457	0.689540702038883	0.752776825761624	0.755927875683264	0.752598067348004	0.844010358058368	NaN	NaN	NaN	NaN	NaN	NaN	NaN	0.540587095738221	0.564168739134982	0.602985021380432	0.529037039208936	0.546429165729988	0.539898314511592	0.541290339885932	0.567346649762003	0.536503945429076	0.552373155385219	0.514002517022746	0.538019130765987	0.559292663284775	NaN	NaN	NaN	NaN	NaN	NaN	NaN	0.525041262053994	0.581667032098084	0.533786286455057	0.502068380712443	0.562847233417394	0.484433395278042	0.483248836953227	0.575593850011281	0.533380817879337	0.501000816581407
0.692811232494097	0.614018046159625	0.714029759309624	0.713489438460873	0.686145807113011	0.571450097329481	0.7182531724588	0.63921908550484	0.714950881660841	0.737704750085646	0.584646796171522	0.678153278310773	0.750319558876874	0.670225304264185	0.700124710653337	NaN	NaN	NaN	NaN	NaN	0.535532348494274	0.545128294505809	0.521975453016577	0.529755573303977	0.550546843784855	0.528838576366751	0.547435600726446	0.580767685320916	0.57829765345062	0.598023159273631	0.575408296518053	0.555320101486554	0.538154551670882	0.547979835494122	0.514069018543859	NaN	NaN	NaN	NaN	NaN	0.500223594127173	0.550184201411772	0.517414623225607	0.501155928101902	0.50463973885783	0.491063907824317	0.498810194311045	0.541771219464597	0.518281336498481	0.4998352439841
0.734573902953644	0.735635714855516	0.701778373411614	0.679340560432901	0.717083282821601	0.790453614073433	0.581401550891206	0.67970024884882	0.752814539302457	0.616248313984039	0.750642884566148	0.598164245567336	0.695349271123806	0.759095770601464	0.616667688290866	0.571512627919384	NaN	NaN	NaN	NaN	0.553825041897942	0.547129529958285	0.549406636415192	0.534100639157852	0.561650686931328	0.588114699828642	0.533737568362916	0.571305294406974	0.561323532203593	0.57381222298856	0.547455347485756	0.558688150989897	0.531041248363099	0.568614062388783	0.553929339650461	0.529749462426719	NaN	NaN	NaN	NaN	0.474431569304716	0.535588118386242	0.494811252636106	0.508127508387894	0.52150211352598	0.542039589080299	0.497221406619868	0.516418748034132	0.509505025274525	0.593654864457936
0.603860430790693	0.716944885136244	0.539766778940154	0.690323379422676	0.670279716099787	0.536258095325989	0.728957715021375	0.732373777756577	0.794499733400031	0.730529093060892	0.674179292582506	0.669968018749282	NaN	NaN	NaN	NaN	NaN	NaN	NaN	NaN	0.567940230305671	0.565354528705049	0.529158518656614	0.533822206248913	0.541030105493295	0.518259991887643	0.519917338463001	0.565794840730036	0.549987208208187	0.533901690872085	0.542807847736735	0.539016991123874	NaN	NaN	NaN	NaN	NaN	NaN	NaN	NaN	0.587053807267098	0.491958357338928	0.508444478019047	0.58176401305641	0.562371000243647	0.503415657239712	0.519756847300317	0.530083140801325	0.497946244740886	0.546099606719215
0.691782328897852	0.625800669624485	0.644072074977997	0.556541275372704	0.695237562093389	0.643545741703738	0.7868817268555	0.732290013985377	0.804181664902651	0.681475258710278	0.703596746535608	0.70027490658978	NaN	NaN	NaN	NaN	NaN	NaN	NaN	NaN	0.541183324905993	0.525391724324498	0.586745992734687	0.519875059599154	0.551003350083043	0.596598173000992	0.549678815822404	0.609738994032292	0.557010236681414	0.538608837282373	0.527704262327507	0.539790751472022	NaN	NaN	NaN	NaN	NaN	NaN	NaN	NaN	0.514874889927291	0.503213005752116	0.646938366889449	0.519798819071354	0.523006921881746	0.601642336669092	0.525195616396941	0.515699909030585	0.532998192216462	0.512166544500506
[truncated: 30 more columns]
