# Supplementary material for: Value signals guide abstraction during learning
Source: eLife. 2021 Jul 13;10:e68943. doi: 10.7554/eLife.68943 (PMC8331191; doi:10.7554/eLife.68943)
Supplement: Figure 2—source data 3. [file elife-68943-fig2-data3.csv]

model_m1_b1	model_m1_b2	model_m1_b3	model_m1_b4	model_m1_b5	model_m1_b6	model_m1_b7	model_m1_b8	model_m1_b9	model_m1_b10	model_m1_b11	model_m1_b12	model_m1_b13	model_m1_b14	model_m1_b15	model_m1_b16	model_m1_b17	model_m1_b18	model_m1_b19	model_m1_b20	model_m2_b1	model_m2_b2	model_m2_b3	model_m2_b4	model_m2_b5	model_m2_b6	model_m2_b7	model_m2_b8	model_m2_b9	model_m2_b10	model_m2_b11	model_m2_b12	model_m2_b13	model_m2_b14	model_m2_b15	model_m2_b16	model_m2_b17	model_m2_b18	model_m2_b19	model_m2_b20	model_m3_b1	model_m3_b2	model_m3_b3	model_m3_b4	model_m3_b5	model_m3_b6	model_m3_b7	model_m3_b8	model_m3_b9	model_m3_b10
0.267010190768821	0.255567892474354	0.294842014283865	0.277710639997302	0.289853452767323	0.516833287298299	0.253454383033027	0.709702699690994	0.272909859861635	0.26151256931151	0.473149728175305	0.269171073529192	0.679514205716996	0.255353547734018	0.76691886237381	0.579515007725328	0.257068876789889	0.263674990821587	0.623817435197894	0.261526185653259	0.255606781108621	0.249689598980255	0.258516080753046	0.262702284296294	0.264377124614751	0.114300333570873	0.246679137419974	0.105007932623771	0.258467510897043	0.250192548977213	0.132208719454998	0.256134066413384	0.161282338046894	0.249290421120963	0.1018847594108	0.187204630653849	0.249965957407971	0.2492586957854	0.155346829890087	0.258474415503381	0.239187572028492	0.245413838246129	0.224328812464982	0.224399610020613	0.221404168970352	0.0973983617314924	0.253038156438895	0.096232933998969	0.234007712981492	0.245275796556842
0.269609254586271	0.263966916819874	0.531544888389133	0.254677278031508	0.393696025002556	0.756435480253207	0.256898036128665	0.226501031084767	0.823148890558652	0.698736424277075	0.271884315179438	0.698689371914162	0.600424012768126	0.735388380067774	0.561528202553118	0.283897794169142	0.623949081871026	0.269073353371565	0.262690409510253	0.452330960709171	0.256012653283507	0.250390669517584	0.140188458041499	0.251070595280601	0.166998766540626	0.109460243576337	0.251464011994093	0.111666275182788	0.0553392258170631	0.112068534638013	0.257660346989492	0.131663487250251	0.144529114104588	0.121715852292271	0.199139488677005	0.265671899824264	0.132711097062456	0.252409473793492	0.254180683335131	0.133481314450092	0.236743456228283	0.241832596078467	0.115125442619967	0.247050678478395	0.161324567952308	0.0542081650451033	0.245316306598885	0.503802476900137	0.0820998819724226	0.109401898564467
0.25593144199222	0.263758518461702	0.724193783284992	0.256522740258932	0.250417726115632	0.256867815167503	0.585869517815072	0.264262433606684	0.451566454025561	0.529259259855927	0.260128908348543	0.269338678054111	0.270743039027002	0.268193164666064	0.315900330397862	0.265708976923739	0.407764281591586	0.81796249797627	0.430848134811117	0.665037668340682	0.248431753399111	0.254920197280141	0.12367728051775	0.249155866894178	0.246982003996484	0.25071334561475	0.201122786794182	0.256304091902187	0.184921940089851	0.139806812184491	0.254125309054512	0.256244700555003	0.215350563596734	0.255410792030332	0.263899645737289	0.25452913699937	0.11160537664446	0.0830172589172078	0.142048921031931	0.0570682761383351	0.252284155614771	0.239765579558449	0.0669831419285388	0.245772895036374	0.250817562696064	0.247662284840144	0.148590976035122	0.244687804050213	0.142992583284537	0.210191627544201
0.269707020935629	0.261810361999286	0.683940966583566	0.587844082090567	0.721315957515239	0.673437289741173	0.65642622960125	0.650596191340294	0.675083712321007	0.276949396890053	0.671449720993364	0.523793088918921	0.272178294326712	0.648084240061158	0.535650533805067	0.607365082349637	0.725873889721851	0.263642155782526	0.256687526853163	0.654005246632639	0.256415657741868	0.247185588182697	0.0649055564172756	0.120554350553111	0.125515406909223	0.104660243950104	0.100870596278325	0.119010234437768	0.14503193847242	0.260983319820274	0.172904194615607	0.0735156470908732	0.258687366162174	0.159602766145486	0.177937859357503	0.188325041129953	0.147505418679269	0.250281266173876	0.247425646531391	0.205704830678869	0.236916135377572	0.241072079492675	0.053051475530869	0.141969111540708	0.073052101395062	0.172186883341532	0.116279420958228	0.177172819956069	0.0879773567315647	0.231968351844256
0.557255326728886	0.257232976783339	0.699225587835115	0.266539055319211	0.259935245665722	0.25907907652252	0.257716459542088	0.592452227571137	0.618806010899685	0.794967356009934	0.618719748299031	0.731210400642373	0.283284316305298	0.813582174687486	0.376691620533738	0.25777867117832	0.255066112893875	0.266088212495071	0.639315508489561	0.317411707727769	0.215067697086988	0.246948139461561	0.159698579040737	0.254538185387597	0.249520160411818	0.247438367803755	0.247270887963277	0.178653474318244	0.115955992337077	0.0968683271638549	0.15912395466897	0.0780464393669358	0.264705319219305	0.088317454713825	0.126597474994605	0.25012354871537	0.249832755047995	0.254953489854224	0.15915154864686	0.263079208252435	0.0992253105205023	0.248681085069471	0.0738370860272343	0.23921991080938	0.246733819304845	0.24868722044343	0.248876301050625	0.125243961493749	0.11313738326515	0.0422924393888216
0.45007899875466	0.268885081241602	0.259207362666782	0.268526225167725	0.587209519263909	0.269006839078309	0.257078963218113	0.485106626747464	0.516879274871719	0.806935370186602	0.84192740682264	0.257065464652142	0.673488428299661	0.2779296140413	0.630069244609664	0.760252849657435	0.847556948055554	0.552698542640218	0.67932222421492	0.240653317099292	0.230956562739855	0.255868242343271	0.249649473993835	0.257611394120083	0.0965183312203153	0.256901792924895	0.247720470658948	0.152467572875497	0.141255058802177	0.108088084543847	0.0626253426171633	0.248433857142176	0.117636335721578	0.258942448424086	0.16829523845779	0.0688843150977099	0.0750370805404958	0.193398899041682	0.0876512558261928	0.14271911694368	0.167768537940587	0.23744869536055	0.249659860538977	0.239474922879687	0.194946099619657	0.235431800018242	0.243363293517807	0.240548177781176	0.140783567611016	0.0484379461683107
0.718897976831207	0.704955314655877	0.408694395352729	0.567379447984079	0.790366298160904	0.76085698347775	0.568527133344774	0.556575137095506	0.815845613442946	0.26206008908762	0.647772734782786	0.253269110834482	0.677507323675018	0.262805517580919	0.81460996548696	0.260098846039593	0.265348657363373	0.69043451074108	0.622037987753511	0.262732568624078	0.131540672567104	0.12088199860421	0.119738350520679	0.172358323166838	0.0873851914196212	0.106510643971983	0.224065410277561	0.0912168203319408	0.0803996072947067	0.255136961783319	0.148989852899196	0.246373722184739	0.129465024325092	0.254657646102818	0.0732096829350118	0.248594660540406	0.248794785603644	0.155670250196239	0.134033347471146	0.248673054387266	0.074907189837689	0.0834812460690297	0.164144346273935	0.110849556070241	0.0723559889121049	0.0708337801400687	0.0535242484730543	0.151467196639416	0.0465033072560447	0.241408438273926
0.756888731784402	0.653556045469534	0.265066002113421	0.677094400284362	0.257216465027383	0.767594483527676	0.266790804503935	0.706052933533486	0.259995045875911	0.708029250354066	0.578776777476894	0.687510900827203	0.659348521803248	0.591240078004866	0.852778370881663	0.268244982465604	0.354490224848247	0.259133640502083	0.257006698256758	0.268770725479719	0.0866703589575308	0.139883238070449	0.254276467168887	0.141105481062288	0.251409345001274	0.0938755527097075	0.250540823496923	0.130379063536005	0.248769066772638	0.142121647640463	0.181228672915857	0.138889853475502	0.160118145294203	0.147668130782166	0.0559420374112828	0.256565185504729	0.144735367280118	0.251856957018308	0.249067074990886	0.255576722224635	0.0729833232919015	0.119615329211164	0.239974649760194	0.0954998404311336	0.251196206769664	0.0601921957655965	0.24346028373679	0.0781502783240104	0.243954922550556	0.0880738521446986
0.398519225551356	0.277770714768969	0.266268369595245	0.669853129823385	0.490772032547466	0.268049958430194	0.476032326490758	0.620523244052017	0.265293170792666	0.265652994870635	0.260663028057581	0.279824189001153	0.383580194508506	0.651682172737409	0.271593555114889	0.266699750731141	0.271315589632196	0.505513960466706	0.631853777666566	0.259336533435886	0.250653540101245	0.260479174420301	0.254906662282225	0.0896807194960795	0.116725109342176	0.255855619158535	0.2109040957481	0.104583660245619	0.252169178326126	0.256161488249801	0.248155183532903	0.260312360188065	0.130279382069503	0.111816226516976	0.258714825170429	0.256216152056123	0.257490704344899	0.257136547819443	0.172606400070472	0.250533510943618	0.167423377545989	0.231334950969165	0.239768804547191	0.111027697375077	0.215743460461071	0.238322355890065	0.14001363166924	0.158693188075953	0.243610039548275	0.240469692198466
0.269606766816072	0.271020933676994	0.572847627347875	0.260382087564868	0.273248536171036	0.265920013436297	0.479709110907715	0.701073451317536	0.26831551738116	0.272949690113853	0.257279704259076	0.388265144666815	0.647902374663438	0.641555564658948	0.255443306983991	0.265666499378934	0.604034488938519	0.253481678678336	0.573657230742542	0.592222594126928	0.256937740243174	0.257031397808062	0.192711140202213	0.249121233646279	0.258288925960571	0.255199727282594	0.152303956598925	0.0757567034067118	0.255250516576694	0.241948104352748	0.249096600086817	0.213605596568388	0.165864393927715	0.164855283919611	0.248879439229345	0.254892897918756	0.091858699843508	0.246221445730565	0.19214030531767	0.118596598727651	0.239483418072139	0.236728166862049	0.113081868796943	0.249682568951381	0.233862926228649	0.241755987634546	0.0969957899819609	0.0799169231557682	0.240199039921878	0.245980787577992
0.646749826897194	0.734964874005699	0.278250617187105	0.599064946654178	0.546420975740821	0.259718972220982	0.521631727150273	0.267630049527571	0.268530991024013	0.259684087604324	0.270280768488821	0.613947457633	0.853579530690631	0.640819229328415	0.807441504612105	0.258025338440901	0.387714766411654	0.708470908328703	0.265557424771527	0.752560380592655	0.0811778504103046	0.10857058962271	0.262007245825904	0.0519826436166222	0.202120581261574	0.252427275768638	0.0811646581383308	0.255130639891988	0.251489679648725	0.251468827664653	0.257674961617004	0.166156642982014	0.0670699809020133	0.165644069360128	0.0855793810470207	0.251402749278459	0.132070638587191	0.142748034302552	0.256634057101853	0.0884626243372984	0.149930045112075	0.0855834541552543	0.224465670549855	0.0449656150258799	0.142693367086106	0.244018444316148	0.163991966843439	0.239885507671492	0.240283910543214	0.252327206854171
0.747248496525387	0.269156708719491	0.25818109758805	0.435894384344477	0.792548266531446	0.253379190853061	0.558691894890006	0.269992681514557	0.256725541538672	0.25709934458971	0.80421336806458	0.264808039479099	0.257708643404829	0.604811225387341	0.277530665805516	0.256767200382811	0.582887657026757	0.268212485671873	0.283412163089452	0.645146643079258	0.113718774491793	0.256007805350988	0.247638684489631	0.170879718427424	0.0818187376871443	0.24826639523649	0.153797176424924	0.256761433286397	0.247660162924881	0.25058123523654	0.0850040672438746	0.256391136968613	0.243943620988706	0.0635017773747407	0.258942194773368	0.249679193030088	0.263025982022769	0.255444857920608	0.262908982133535	0.108531897627236	0.0956466846454662	0.236961673385184	0.24592611832137	0.164128285883479	0.062209706792278	0.253780479011048	0.147930587503008	0.237253392934615	0.251538341788838	0.251386940642019
0.275099868955968	0.835595903599614	0.65728321300206	0.269489791684311	0.257630635500279	0.262271813033545	0.733115214122963	0.445161011261399	0.26974762917557	0.529330976748424	0.267970256968441	0.258203662576261	0.260413015664108	0.598305760391524	0.589268722943868	0.257184593763379	0.675003455982381	0.598076513379343	0.26060732371869	0.823890512462168	0.257767605066809	0.0570705582198537	0.151506692553617	0.257191680533282	0.247213986588698	0.251920011727494	0.115682421522949	0.22667002500046	0.256148120530066	0.199757228279611	0.256235610737254	0.246606458195757	0.247332698824472	0.237584005792742	0.20540946734936	0.251758234290643	0.147806669836225	0.18181403932941	0.251944209180119	0.07397352953679	0.234019992015901	0.0534738966275954	0.116468707259984	0.236992714227913	0.247081753781496	0.246731737526955	0.0504101791103328	0.189439874494131	0.236139532609768	0.0902411882551643
0.331623776507345	0.766474993775963	0.751481646905349	0.631967828160824	0.589065341293163	0.269672975256267	0.562555116473055	0.667598536324225	0.733333353637859	0.584255525229791	0.697855281620599	0.717380674731157	0.258825591946903	0.762461595941147	0.25674054441949	0.266883562032593	0.682280811151748	0.605889822111242	0.260443176146371	0.258946573247557	0.245541538230289	0.0835311141145181	0.117211630753084	0.155100506471905	0.195755545848393	0.256188729020175	0.189673047447594	0.130539170163312	0.0954789999124185	0.18628478575797	0.112425730260114	0.108874596806158	0.249296965021345	0.103096008526073	0.247350625552089	0.255307534527186	0.129285884988087	0.102030285466197	0.252574552935069	0.251576449115692	0.213363607442281	0.0569868035631577	0.0765358722764177	0.121615259378763	0.160845860434308	0.237298082213457	0.1587069545665	0.101905087908034	0.0899260894213555	0.124376044735244
0.269277287742613	0.71853057793442	0.529214758769152	0.256640656792216	0.268711168759899	0.788996993107622	0.295286564852613	0.708098548058497	0.263467014748649	0.26223286373593	0.260057623883897	0.271383280731168	0.704942594434358	0.256913952184521	0.278209874289221	0.270337541860918	0.253090511969504	0.526893498178854	0.196515205964624	0.275052812287993	0.255625865282986	0.113308020377733	0.230177327101381	0.250995987754298	0.255855163496177	0.100689467670105	0.119664420997976	0.154675479664685	0.249858611577489	0.251327648869251	0.249440917655534	0.257201256056189	0.104416703451429	0.246058674758036	0.26041458210473	0.256777717271744	0.246484349919891	0.221323084113045	0.109372003837555	0.247817334047927	0.238127431836884	0.0872238695602786	0.122205189696057	0.248632934486494	0.237759018171564	0.0534463042562455	0.188591233390358	0.0841453154534654	0.249735948776114	0.238293410741544
0.264970724431711	0.271513848577085	0.474314230254143	0.258600145027685	0.61636904801271	0.68246759938712	0.734238173582224	0.580228756923376	0.658684290217099	0.714150829805495	0.257570646524163	0.372120782440931	0.646723431199695	0.264992282155215	0.262664537944643	0.263165967200046	0.593110680388153	0.776706097227764	0.257043171759696	0.713321453995564	0.251503687657833	0.257383366905577	0.0896618785383591	0.249002719856474	0.177858602477715	0.0982175391048015	0.119634540517753	0.196290713018053	0.0917990761687103	0.123613426370403	0.249719949197859	0.21795958800789	0.224467531968235	0.254945610808335	0.251749997954122	0.254304418694783	0.187944548607561	0.103927078627811	0.247420327404559	0.120207177377772	0.250964515692611	0.235246467051477	0.365939392726306	0.247773141559146	0.0821632889616188	0.135522302999245	0.0803794860735971	0.108538732987011	0.0675596337347194	0.0691056860854094
0.2559532041511	0.631638365592035	0.25272111024789	0.185516238701387	0.666369551008158	0.763249002443224	0.255098041620601	0.254458335681135	0.627010937912546	0.630877157487092	0.561198298828586	0.691206484131609	0.797618401549617	0.257344606534548	0.664976567330769	0.268863856289196	0.327275470554523	0.689042878497781	0.278369177347511	0.696448181074443	0.248794413651629	0.16597085395993	0.247820484940249	0.0746586232030262	0.164821803103325	0.107615358790244	0.24759305156443	0.249883961380269	0.153067088424269	0.140077969741313	0.208807346294934	0.129577505832109	0.0903525056667616	0.251537726806506	0.158988711048146	0.256046258603625	0.185695853861641	0.162614359283559	0.261004625042556	0.113873486402055	0.248293639294335	0.120894284952782	0.251922821256183	0.043709339454479	0.0711978398163792	0.0753305082266908	0.251357571605806	0.249197276124548	0.109940655776828	0.116880639110995
0.815249907038215	0.539700545846157	0.270857486879962	0.252049707771515	0.265290124018616	0.486181727395642	0.382866848849914	0.266622489334249	0.458257348127206	0.260662064052659	0.276554072607884	0.654068549292776	0.660223642599809	0.75332892886129	0.567898617325589	0.555651909580721	0.270409621525144	0.264065183487295	0.25321686993764	0.254833105035745	0.103149961355511	0.135761648325848	0.257040083441384	0.249504057540722	0.250002589954955	0.210225365861068	0.133326600434675	0.254921771549335	0.125301637635554	0.24931619711423	0.261277384920247	0.0530243831516532	0.101906513850787	0.137781157939676	0.0913931934931638	0.194702473273696	0.256741526518975	0.254926675995992	0.249028833237276	0.251117736191301	0.0465037196277379	0.241783708741171	0.236183919006175	0.249763523811047	0.236416102046857	0.152091355365717	0.261501846855011	0.238623276312305	0.294255544106034	0.245471982561153
0.252823474424101	0.274773315493813	0.668456351793169	0.257138810402604	0.315492284882519	0.500465523679771	0.656768484853167	0.254017908058155	0.671051417983791	0.744167827484563	0.274439306720636	0.395865530496361	0.269084098752707	0.255614318233348	0.259774658579203	0.716032768441463	0.583008851999374	0.687934393449355	0.262127888226355	0.258280605181157	0.245969106494651	0.257678295454112	0.0900609297657429	0.252437562229429	0.248250215474076	0.231424584685008	0.187658528693109	0.24797514083726	0.152681126224214	0.11274813280441	0.25895930399238	0.119355944323112	0.256473720402777	0.248466985191294	0.249286922072743	0.120331899844523	0.208083348084157	0.143333598546858	0.250331779381579	0.247976179211038	0.252621470089514	0.232854278980238	0.0890905884987713	0.248021198472295	0.232011392899343	0.179753507987932	0.0840810797672571	0.248759391446332	0.0852356754180253	0.0629798753114104
0.269585776745411	0.259228965605104	0.598784275191778	0.578852511260643	0.821897934218885	0.257837572123379	0.720167217138488	0.284793077728058	0.259121633665189	0.25629900687587	0.257771645533173	0.310894727444875	0.279159890080163	0.278966566331381	0.384434762371597	0.291898856764282	0.664994660184198	0.255261738648092	0.255117282089116	0.272740555929886	0.255844612766318	0.247978102016334	0.132023771311802	0.209420935562866	0.0769570878525627	0.248765466876467	0.11722684770164	0.261506810885353	0.250414892361612	0.248210195603622	0.249545046514298	0.26875501778551	0.264436842181442	0.262130810109476	0.238932773743419	0.221708693967543	0.183708890255237	0.248959096691776	0.249023496552572	0.25803011636894	0.236236868964221	0.24619336487516	0.181384958796179	0.072256910216629	0.0633329092790343	0.248433446463855	0.0649133081366977	0.229881901263261	0.246323290789593	0.247511684330621
0.667659078950927	0.527340922064053	0.619270431185736	0.647982089797998	0.262912558215192	0.267937849924976	0.2565970117872	0.262367680924772	0.681049690366747	0.54616816181283	0.274897469850138	0.259467795435522	0.255190262067442	0.267377399466147	0.590178389335786	0.259877213072033	0.735530209138714	0.297884011877037	0.307862268725584	0.264348897740873	0.124042973858227	0.13486728698019	0.228467511918735	0.132997891511766	0.248602879594893	0.256340513843206	0.247526980704113	0.253096415609321	0.143097100983189	0.150552546328757	0.260721755246601	0.25001411346813	0.245988544870419	0.255521468860295	0.0463333377779263	0.250786483815149	0.0978836188763654	0.266345526694117	0.260486688028588	0.25283046810932	0.104687927040836	0.213845671821557	0.0764634710635884	0.138503897763343	0.237715190644241	0.23922705309429	0.247466490625061	0.241538989819496	0.0890896278109743	0.147092831830878
0.702449427421778	0.676003687450141	0.721426829291855	0.259699687478958	0.25448541914964	0.40170212274428	0.55029489305607	0.269749138962134	0.203577815560305	0.264000146139823	0.513662732473204	0.26066940311692	0.642901003373038	0.291566308518724	0.270843688543428	0.813397166680725	0.256661365998799	0.262156806236061	0.790340423284926	0.567429787803258	0.099856816771681	0.135718892227338	0.121373041855917	0.249481447030868	0.247120067048091	0.253084930258026	0.0952820947672448	0.256216451196666	0.135741910387186	0.253748912870546	0.159951760161886	0.250781696606016	0.16540093794929	0.200123110113857	0.25673105408959	0.0971285221420306	0.251005545123379	0.253983911437791	0.0400450915337276	0.213129509027126	0.0759530202704627	0.0988152864003465	0.0940403242450694	0.23935768676967	0.248124162738145	0.181948630522824	0.171449954613561	0.236874723070587	0.45465354648464	0.239055282472276
0.25591971226673	0.658459730823767	0.267729120797348	0.257163660562884	0.762528240816898	0.257994430829638	0.680938689887618	0.691412543421633	0.259228318029546	0.267256414666082	0.28384330661649	0.804644404971149	0.2608970620315	0.710139024208991	0.797448568098257	0.461291846178213	0.714461620301975	0.266429791107289	0.256503766356623	0.73602592202412	0.249277613720547	0.126505067866082	0.255925126566518	0.249973134470323	0.114503648733128	0.249298293343843	0.144869690062419	0.140356884768686	0.247508510629825	0.256459100002023	0.10692645763868	0.0821549147999403	0.250210161536572	0.111255604315792	0.0876984653037626	0.225239174867366	0.125435015875103	0.254727595720371	0.248932202908866	0.0927249896116075	0.243777953543671	0.0931870342124935	0.237932273072503	0.247057142003616	0.0406261268924092	0.246272244173604	0.0967465645868559	0.0633877120160722	0.2416941307101	0.23934880885948
0.396808420847858	0.707194212610294	0.270896986715679	0.557491327851219	0.267514284758134	0.471905134906188	0.268044758737531	0.469546545259494	0.262508195098145	0.57295772573371	0.602929637799905	0.72043442906685	0.271523398642275	0.873891964635266	0.574034017992986	0.647185949594315	0.258241534046983	0.264395380797966	0.255181262698003	0.338022133943052	0.224564060627425	0.135381941991067	0.252535643227709	0.10752321629517	0.255967750015831	0.181418972433043	0.255166937354429	0.204534260462776	0.25519417749819	0.13803011600313	0.0627682106763355	0.100840036591426	0.256073141858189	0.0483675789722963	0.116312855291078	0.178219671185798	0.251880518635463	0.253700389580003	0.250033878941238	0.216221592971535	0.204437680043758	0.0831519811185626	0.224031726828904	0.184575271241698	0.239666363913653	0.23173198120959	0.238227961187549	0.267533055579537	0.241085222655144	0.0724139564494806
0.779400017379338	0.684702733800269	0.270683371153418	0.662926204282605	0.284536200825033	0.255132903596007	0.63804276221076	0.839023643735626	0.262540077828761	0.575313865765818	0.600392385365546	0.764157820456849	0.695819337853723	0.574272788629931	0.643331910728245	0.318420417267428	0.259038394608601	0.268653908041641	0.464135809118134	0.756086327463736	0.10128613039685	0.0776183951735356	0.257861841755288	0.139239862636821	0.260275448687992	0.246757955919138	0.141837586298459	0.0610504814697698	0.245274868990343	0.173282646992435	0.11646628829215	0.100815146806775	0.144204607380542	0.130001678407545	0.195622220601828	0.271933843299844	0.248300040000978	0.255901744642411	0.171906609566745	0.113870909434255	0.0635273249324535	0.136178422751666	0.236704133235752	0.0918361971205016	0.223787842835278	0.251224932855766	0.119219374770379	0.0486941641688099	0.249019227532099	0.111673227712093
0.586767817877141	0.265500149901311	0.255920511551663	0.260278405987162	0.262483438027736	0.399619095472195	0.318462879489264	0.453981204466778	0.263832165103174	0.265849418780477	0.722581914182044	0.256427532502757	0.694744310923741	0.271566402095229	0.254570487336498	0.2668160033968	0.252807776269821	0.278807355879644	0.252619789550097	0.257138563135033	0.208578347937156	0.254869861716006	0.249356944601621	0.253745185915033	0.251731482540108	0.181244819133601	0.240557354484932	0.12762703071932	0.254202055586991	0.248116329677664	0.117672617000639	0.24514673708057	0.187616561215724	0.257949100574272	0.248241629549108	0.254394497079687	0.246260090054438	0.26245282617212	0.248763275958665	0.248583762399726	0.139860348040276	0.24042602639991	0.247124570055861	0.241757077771409	0.241081209676273	0.19454929021047	0.24749974171903	0.163255060251121	0.240413931362235	0.247276760370075
0.650502719529364	0.480963586563453	0.266735035701195	0.264398134239797	0.25771505582402	0.267208832697382	0.270108828061456	0.253208178751431	0.255479064373345	0.262385988171192	0.606819640611514	0.382477007280328	0.25083370945637	0.278831921220351	0.266023318054953	0.369171983645268	0.257913213280196	0.525364416444485	0.259834689223878	0.683045471258554	0.0985434838720425	0.156389221370514	0.254698634455313	0.254304846383121	0.249464494483654	0.255951226506055	0.256776938608339	0.248969894039471	0.247473451003218	0.253684345963229	0.194440920809023	0.0802174371781269	0.249690738156194	0.254043090021925	0.255004930520436	0.214568027759247	0.25227255611858	0.160048408875752	0.252770389247979	0.139547354414922	0.100166339770551	0.227363663759278	0.238951075313855	0.240481825637776	0.251214127138109	0.240342438366265	0.235375678752454	0.253509143205361	0.252091437545773	0.242904308645108
0.257904294228004	0.261109645217209	0.471366880712023	0.72016731503841	0.654825408857907	0.269314741324441	0.647118075057403	0.260458198129728	0.690734063025319	0.253559751945474	0.638159849713491	0.26922188367017	0.258631915957484	0.25484142118338	0.773137028510056	0.556944376422183	0.614014546020952	0.775275076660377	0.258549134820642	0.698300278905863	0.251617350883815	0.249420161789822	0.2648310802571	0.0868629611690414	0.124685524071218	0.255813768067793	0.175789592616378	0.250571292008069	0.139191703909513	0.247184007440777	0.175183242816797	0.256753394137923	0.251303551390488	0.249165112681432	0.106273592304363	0.219904011291822	0.0997020305386942	0.102070683882992	0.247725104469528	0.111792347615237	0.244886345515991	0.25030623039999	0.147226958439612	0.10677577941955	0.110460003538378	0.237096730769537	0.0890758730810942	0.242187958921009	0.0895549391920566	0.249184640148612
0.537518879948463	0.26346498620295	0.25863298141595	0.494186533751788	0.278130161604574	0.262666076895952	0.698181944145666	0.593364438755909	0.271663659288885	0.259771155222802	0.560219736620163	0.715605407444452	0.253190636560557	0.645511780863331	0.267456439298169	0.258487471452114	0.275089954438414	0.603818097311031	0.784535629253176	0.268802283281308	0.248660858502903	0.253753258853977	0.246733574301288	0.161214872647519	0.26017084120874	0.252793307663834	0.133094370510626	0.221320573627672	0.25806089636564	0.247804087196657	0.163382211677163	0.117821582757097	0.245632803471246	0.125423003876043	0.255015630895484	0.24675025410964	0.259313783811988	0.185586988215062	0.0919680846486331	0.255736763078876	0.0923633793328875	0.242559098741633	0.246158099075937	0.181505635789388	0.23115201124124	0.242721421629845	0.0977810019700627	0.0856460496423286	0.235684616117478	0.244162700010943
0.51195601153691	0.445024882949806	0.258047378746303	0.265093502634736	0.261049117420041	0.68753480302219	0.257280844004307	0.688064743355466	0.263744572826891	0.52523748363787	0.714870660295176	0.614819129571795	0.264497868729677	0.729385756350159	0.748444831097271	0.406211489428978	0.351404426664889	0.740720668746869	0.259462733983467	0.255109354084368	0.166277356972053	0.384455773072683	0.246826629784209	0.255256744717437	0.249688158436402	0.130579770874106	0.249801423581105	0.163433646044721	0.252034044256987	0.226749186998607	0.174215232635932	0.123440069446237	0.253653008863851	0.106894610171793	0.105913754687766	0.251810383347428	0.243264824473171	0.120078911896786	0.249005137735291	0.249690675984714	0.166670337711678	0.0929033055818266	0.248624078372465	0.239038564551519	0.242646788727507	0.0707546854658353	0.250286194576458	0.0676993007164182	0.243330465194311	0.108809184972193
0.260062222000062	0.26811590024468	0.553546089440135	0.557795324369177	0.275256390014159	0.272188537531213	0.262997549462595	0.257417048205796	0.267373110970258	0.257337282759564	0.259184930854594	0.266273149850935	0.267403758811856	0.601193666519323	0.804715780456887	0.677536750648583	0.630186072522867	0.667141376143043	0.615628073717562	0.2703319383291	0.248777564605458	0.255336690904255	0.152467520773645	0.118598580961249	0.0714384168739542	0.257591067998823	0.248557710204143	0.250309332674546	0.255309830163124	0.246679102703426	0.250053508948569	0.255448138090717	0.255849740291565	0.129877499002045	0.0774983893737054	0.145577222237317	0.130151063192326	0.162161548263263	0.171529774780014	0.256404711776453	0.244953454144003	0.238830067885094	0.172753646912112	0.227675965630144	0.595910019195452	0.234124685289843	0.244155388775229	0.252185714946946	0.23815869277822	0.249526476934181
0.270833296766923	0.257958563158257	0.535332246790876	0.600221340239651	0.771113310668026	0.785014405753963	0.624873913285974	0.706979178765771	0.624890094529076	0.461618348999249	0.273547389192209	0.257396475217208	0.265309136256654	0.75656428055258	0.777548441531145	0.261357657788441	0.755297252264649	0.516949156424137	0.657858759304414	0.264273604556213	0.257985758024007	0.249135753497146	0.0782875372174335	0.16357988227376	0.105210327777555	0.0575966832663815	0.182847395250435	0.13917173784885	0.1720873747988	0.2026826978717	0.258510598413283	0.252289762118445	0.255594056142682	0.109048315704893	0.10448851280577	0.249368507758775	0.0984542826160261	0.232597508179509	0.154980151707964	0.251871193093219	0.236556366096919	0.239044150149777	0.129258999693836	0.0697243628320092	0.0679910003397554	0.0713103096216181	0.100963239744873	0.0647627574925434	0.0643008226869296	0.17453735423872
0.719562317128953	0.480815263362467	0.716364044491861	0.773648970105134	0.473306535517008	0.276326153180113	0.275273239648593	0.557874046567987	0.796197099953014	0.681048157801471	0.611263220372682	0.263078598755871	0.68048299502359	0.331948537001424	0.169599974970187	0.578217030019211	0.262420275307603	0.259329519990419	0.646636986893583	0.280905288307774	0.116921523906452	0.206638484793578	0.091392870414244	0.0904215275465428	0.113566465300661	0.258177111805299	0.25836404886862	0.114192773886891	0.087942328108314	0.148834019827411	0.100347714756921	0.254212062149272	0.167428439079349	0.0922546838542451	0.1321919891301	0.136316255832128	0.253465836579819	0.247313485162759	0.167502862787138	0.263917546733449	0.0828196850931006	0.128394365044033	0.0763702016067584	0.0641324360451496	0.226275629974352	0.238286879147026	0.233858544519822	0.178939093443456	0.0567851965487784	0.098093045068994
0.686288365368547	0.259764752136082	0.255758372714827	0.265478893925809	0.260059730491206	0.262917245924268	0.604410826786737	0.261639986855683	0.567858831409244	0.27611871592094	0.681986195633124	0.629106336417812	0.721420134980235	0.718101539752121	0.271776489152609	0.26534282100917	0.259864539996234	0.644321976428427	0.686276881496868	0.609495491090782	0.183682551143184	0.249756074414084	0.246720630671338	0.254667454795319	0.252467053042946	0.251301465525081	0.123613146817582	0.248207291942911	0.204779333889962	0.220545117211137	0.143533082979657	0.15861094855668	0.118884617455067	0.0918766428129942	0.25859362096107	0.251445582473668	0.249526206389014	0.161965523932908	0.143579104524717	0.11188535495026	0.0634558836880048	0.244581496111458	0.246720630671338	0.238522161006146	0.244234662450552	0.23852455459252	0.183675023486698	0.246832651685862	0.10862966787822	0.224476402943978
0.811804906896246	0.281768099753216	0.266241609682559	0.268537629345867	0.657180522505948	0.258187054941281	0.601025103729693	0.736479161865829	0.276983897293545	0.267448722966307	0.257922080928613	0.743020377921889	0.254522524171166	0.422612336715483	0.264428065615215	0.679042334590199	0.558916788865736	0.266302428814002	0.607595998423326	0.262278820269831	0.0763725586194522	0.199886476556553	0.25213678100186	0.25590260315937	0.10889522005737	0.248742541332404	0.0992771860375736	0.131593896556911	0.262518852448708	0.255377958659023	0.249571929581462	0.125802494951178	0.247886180707609	0.274704295211425	0.25364623418469	0.0839064401514943	0.179474356241367	0.255174533250358	0.184636734734786	0.251291263776182	0.0488641776009273	0.279886180892865	0.243386560245909	0.236571505562416	0.141668368148489	0.247325310583662	0.160310301977994	0.0560737919196457	0.229920862861571	0.238216502409693
0.343867132114933	0.418830498493236	0.59634831327215	0.493850063638405	0.598449670481323	0.265363226195665	0.251726088990759	0.2540312486212	0.338634454759873	0.452089683459401	0.479716396929932	0.339692548206794	0.731997218335033	0.67455021430408	0.257050639287053	0.264222280752199	0.269885931015596	0.273915237294522	0.272684676694469	0.272032252862141	0.1942515250685	0.0801402064229722	0.186469503977644	0.176992578855701	0.133656308507012	0.254798118164754	0.246586939165527	0.247398738490827	0.17262345239606	0.278193357270942	0.181955100859363	0.174459604781699	0.115041276460022	0.170488762058626	0.250960507377376	0.249442646872093	0.257917233783395	0.258545957868292	0.258289423268441	0.257909939305334	0.334570059804835	0.435439093178368	0.157237951548489	0.185602386814687	0.170838975277296	0.240061950573675	0.255100032678186	0.246225292804291	0.424762495960385	0.12004016217959
0.264924438401782	0.66117920696537	0.267318959176811	0.262641326527986	0.674158329892336	0.589660110648869	0.255623217394635	0.868234823988737	0.26523266863098	0.687807398792978	0.256840201775028	0.508796776217399	0.269423554588839	0.648293781355937	0.265164354699333	0.260464648409459	0.270944534204229	0.60390485165826	0.71595835692846	0.281242984805327	0.255017814659299	0.0957422567654077	0.255374263197501	0.254507903816886	0.0955413902319656	0.157688424784488	0.249916496674323	0.0541096630867783	0.254904666407179	0.142209564490347	0.251018258272249	0.285773091195392	0.255906267998764	0.118747873177807	0.254226572998135	0.248093548206568	0.254796290893021	0.0846850083613536	0.125434605584692	0.235824583602466	0.238446872620289	0.115566490818857	0.238615553143577	0.237808853238832	0.13771393911251	0.132892652507519	0.248420571673994	0.0377567669113124	0.238389060735077	0.0784424787859266
0.472098558877544	0.27275767904023	0.554113952205431	0.648471410299485	0.255044703027043	0.590656400272187	0.254541489688177	0.559994046416203	0.257883332603833	0.265579397732764	0.656995865906323	0.684562086355418	0.259901824846057	0.649036280061908	0.276155685208783	0.751732696092335	0.266222552525654	0.263140416781921	0.632783229914606	0.271434364671509	0.15565805277108	0.259027987513596	0.130143851044157	0.152079574701095	0.245637030823758	0.195956774607932	0.248611837039196	0.136645248569554	0.252171825008555	0.254574338753735	0.109144411069858	0.142597177809913	0.248769954602068	0.108040295253493	0.258246464914186	0.108718956910454	0.255046620803298	0.251401610147812	0.1165377259481	0.259621565486873	0.252572744384682	0.234804960340513	0.208421574928357	0.0971275443381589	0.24961695909881	0.123515516365662	0.248411100652884	0.120413737238942	0.246510876187965	0.240742551507049
0.258991620865935	0.257892784193128	0.271614875922464	0.271458331200081	0.260174714428343	0.252988983110931	0.821803208954125	0.258296574054843	0.704921358015762	0.445993414517155	0.605632061408814	0.266077123701626	0.294068010630437	0.704671812756707	0.471232221247427	0.26321294432272	0.775687265846415	0.270036534279287	0.769121867477286	0.527747409631033	0.248631060991222	0.253230166292811	0.256773346795524	0.257814200623449	0.250189804054239	0.247741504022716	0.0786682321171128	0.247764154162619	0.138025438580496	0.192449880761772	0.116225064595951	0.254621710455521	0.263804461495468	0.0342197021539385	0.0553406012686891	0.248410286205032	0.0955916834658873	0.257285137688683	0.110459382718036	0.135692944448741	0.243975454288564	0.248037411854378	0.23443590437557	0.234822810508557	0.260385893712287	0.253037894224161	0.0503681834094112	0.241725835925639	0.0701113783898635	0.174720638674463
0.262329661273893	0.264191367871535	0.696019295433009	0.480411295597712	0.634110245480617	0.260475875421281	0.538265464979788	0.280921360701424	0.616771396014626	0.260493991759158	0.259351079534419	0.264106166628302	0.264258894392112	0.780170686565726	0.697422402271533	0.520661275763416	0.259076161538816	0.684065443101853	0.272865104349761	0.263739285723336	0.243515532397609	0.254019085776649	0.148056266160142	0.12109185311099	0.194979006081704	0.247957559686702	0.209912414926046	0.221714267523925	0.176490273394456	0.250511901307576	0.250250724996161	0.254602233275629	0.246247186190811	0.0976421903687415	0.145149227007454	0.204438494225023	0.249212712111384	0.145706603507108	0.258049672395952	0.251588488238399	0.235746290745796	0.24049593409541	0.0718366651619994	0.113327789154682	0.0846659332093295	0.240382748056323	0.120894189990151	0.291599071135005	0.0981692559840888	0.240040899466578
0.257754129222116	0.591560033425985	0.533922022805904	0.60500581180273	0.255566239235	0.268911479341506	0.585167610747104	0.61818918679113	0.258238092699852	0.712255433896803	0.269189246382295	0.782281994230655	0.814043692085043	0.828135742441693	0.553999971184622	0.263931799748713	0.48382541729291	0.690843775225862	0.256578550951482	0.273544994378568	0.245940058277483	0.119167066859394	0.215467781136546	0.14967221763286	0.246750616453157	0.255568373241127	0.161523819758656	0.133165688730414	0.248219407460189	0.127395959439695	0.255898802186921	0.0889625344384516	0.0681072310929626	0.0781664893826936	0.114378764550969	0.254696219380151	0.116612274405029	0.173574562254696	0.245748559552512	0.258837968024075	0.253764420796131	0.202652418681416	0.0820694578537461	0.117955675809592	0.244425275504398	0.237310162941693	0.121823691028991	0.105607735711689	0.249222021299531	0.0762303682661844
0.259708775806258	0.816834295171476	0.265489312129026	0.813556643873719	0.25267341712758	0.253791315294968	0.717864545508016	0.265727150485154	0.655177209776925	0.262688430887092	0.661518713266706	0.267210070285719	0.769380650175416	0.543629614690585	0.257909669888017	0.259428282732713	0.697745182408153	0.254093154886414	0.812657324696177	0.262595466914252	0.247320598347732	0.0794752929190657	0.254541574061038	0.0848704308934451	0.24811857789756	0.245095392269514	0.113058320983643	0.255157588354013	0.209921205576748	0.249831554813974	0.173227039172636	0.255447160107575	0.143315115087597	0.156885767808007	0.248002108732975	0.249887739533604	0.107930320890792	0.25002965112346	0.0551840710409077	0.249669268924877	0.25336090295833	0.0447717615533379	0.239839342406228	0.0474765129775145	0.246355240798474	0.250828261291587	0.0922037710116636	0.240141464451199	0.0604354753958319	0.249558612404798
0.26034866797577	0.260500155586668	0.750218798105715	0.578579331299877	0.64381201728694	0.586218357598748	0.260958442754847	0.270569658398168	0.698579052664758	0.262635225000568	0.256361488469023	0.574119725136463	0.466142384923352	0.262100738043722	0.260604931247181	0.642444550464613	0.272720119058376	0.578488834795208	0.272836372495758	0.250271877858624	0.249877252386542	0.249340811360885	0.109159364465661	0.236719099595512	0.152282474680851	0.140545869556506	0.253079220705531	0.256768006258761	0.106170233989202	0.250330168559365	0.249109490746427	0.174348876760617	0.0714541126049494	0.251485948693806	0.253421432035966	0.163974630807512	0.258017607751095	0.111463087729575	0.258722507033335	0.249396328897924	0.246038525960172	0.24304029411257	0.0485060303043886	0.102983761516718	0.105176216497619	0.0819474728831808	0.242646469318859	0.235274832845169	0.0706265790500931	0.247520796591191
0.4903860176283	0.586633331913361	0.257551088987471	0.254231589255622	0.685713435120695	0.665405454127496	0.271586033741351	0.81284629887343	0.596597709368919	0.26493702796712	0.259598390927803	0.271954292143509	0.659144843585385	0.370535566103137	0.265477121596554	0.43546370430267	0.261416082254871	0.274882263366059	0.260782991661877	0.589558549746291	0.236500403722393	0.18595975746338	0.24920169981994	0.246887133918494	0.157285170823691	0.108578456521328	0.25790468497702	0.0788603739416219	0.138035299318315	0.254001787969092	0.248185811386662	0.258057179936346	0.156307292982399	0.107515700408559	0.258036471762506	0.142713600675125	0.248011502696291	0.260071916217395	0.247958175073803	0.150597949842421	0.133812913123579	0.115338515654377	0.250230495271382	0.247564672006456	0.0892334897236322	0.108311151863713	0.235583560355668	0.03827761890098	0.0962577477141802	0.242004371886996
0.269608968864704	0.254915241009309	0.25231086307405	0.603242150271303	0.265355467351313	0.328840565449413	0.719192891015628	0.716589176987349	0.72195284714099	0.256002737369479	0.631971971462663	0.847864925198275	0.73548547566036	0.483731842998067	0.539362177426881	0.582104955239763	0.260288423538581	0.683449757949958	0.421718552522516	0.256160111660723	0.256838541155069	0.250115061384173	0.249362200330407	0.144758034499209	0.250716813356837	0.186231252195531	0.14144579268257	0.131138741144406	0.155978420653799	0.249316526213877	0.114155154363721	0.0677646830378581	0.12858445657226	0.220033635714791	0.153897825904535	0.173522256391839	0.248862366291233	0.144420485321523	0.245331750830741	0.24756479198781	0.236041287549398	0.246654390305604	0.249075704356809	0.125148208593277	0.241078694975799	0.216755163262025	0.0735329612502983	0.0757723360717077	0.0768672400189154	0.255732862070031
[truncated: 30 more columns]
