# Supplementary material for: Value signals guide abstraction during learning
Source: eLife. 2021 Jul 13;10:e68943. doi: 10.7554/eLife.68943 (PMC8331191; doi:10.7554/eLife.68943)
Supplement: Figure 2—source data 4. [file elife-68943-fig2-data4.csv]

model_m1_b1	model_m1_b2	model_m1_b3	model_m1_b4	model_m1_b5	model_m1_b6	model_m1_b7	model_m1_b8	model_m1_b9	model_m1_b10	model_m1_b11	model_m1_b12	model_m1_b13	model_m1_b14	model_m1_b15	model_m1_b16	model_m1_b17	model_m1_b18	model_m1_b19	model_m1_b20	model_m2_b1	model_m2_b2	model_m2_b3	model_m2_b4	model_m2_b5	model_m2_b6	model_m2_b7	model_m2_b8	model_m2_b9	model_m2_b10	model_m2_b11	model_m2_b12	model_m2_b13	model_m2_b14	model_m2_b15	model_m2_b16	model_m2_b17	model_m2_b18	model_m2_b19	model_m2_b20	model_m3_b1	model_m3_b2	model_m3_b3	model_m3_b4	model_m3_b5	model_m3_b6	model_m3_b7	model_m3_b8	model_m3_b9	model_m3_b10
0.25949808666495	0.416376299902746	0.439148853561071	0.521576738917133	0.722574711481194	0.76081932242156	0.261598825529724	0.879994839348837	0.654240276476442	0.832429565874559	0.718581357393444	0.262579980087133	0.75787181125341	0.76478876923349	NaN	NaN	NaN	NaN	NaN	NaN	0.252395374794819	0.314983501591121	0.11876505320837	0.277976515359043	0.1204307624523	0.103667853962095	0.245027642677381	0.0526544487394404	0.0690654722124269	0.0730893643149028	0.0841225668177294	0.25084446312268	0.12519772068478	0.116987222202135	NaN	NaN	NaN	NaN	NaN	NaN	0.244065719114392	0.129951069666645	0.32485816163633	0.10454878500984	0.0828497041624582	0.0606920564049357	0.258649559726945	0.03142923871432	0.0662394784582829	0.0323961949468875
0.257295323090492	0.763497074034977	0.60127899993004	0.259690538613499	0.75160498902377	0.746482455440939	0.794706024930885	0.729601401816504	0.248597038827379	0.25678062658259	0.823715207502755	0.680079782231448	0.740651633216627	0.677128753102547	0.580572658082809	0.744410027691177	0.731628131246567	0.679466715586083	0.690816717315973	0.770923717431902	0.247765518676338	0.0947737769353051	0.163781698491454	0.249378564491889	0.116358499296938	0.144054253390327	0.076565963276542	0.138432225347784	0.246956104220236	0.251140061236468	0.0572524179400167	0.14565180291683	0.117656218723081	0.1229507609012	0.205440836306538	0.108295567971188	0.1172703084152	0.105761314073472	0.12537780238579	0.0850353087690238	0.243439628176669	0.0638057375439247	0.175572441707335	0.235290002589333	0.0658528893929314	0.0613699835348324	0.0722491052219819	0.0760839451408045	0.252219708101406	0.244982920223437
0.675926000165289	0.26208193017734	0.880436786407428	0.726476485484888	0.65259879142197	0.25420125626668	0.259142188052229	0.748781686099119	0.646887381428851	0.880846192885235	0.703395852971781	0.803903150402062	NaN	NaN	NaN	NaN	NaN	NaN	NaN	NaN	0.0809306219414224	0.250744233360478	0.0554713913090233	0.140420093309848	0.0825168442697053	0.248667245292769	0.250031653099581	0.136981804299987	0.164146950940371	0.04485088313889	0.0938000758079127	0.10784041369341	NaN	NaN	NaN	NaN	NaN	NaN	NaN	NaN	0.0576665347374441	0.243621508356076	0.0304526330980137	0.061594552616839	0.217775634114774	0.251970371240227	0.240716481330784	0.0686422174127008	0.0938720719347191	0.0462690109614889
0.292718938978982	0.839594427878725	0.370385350296323	0.260134351714464	0.703500648183619	0.602740094473714	0.255645782280792	0.261264580390417	0.688010211556812	0.764465886406529	0.595354237433858	0.694163172883744	NaN	NaN	NaN	NaN	NaN	NaN	NaN	NaN	0.271787413062127	0.0801390707955067	0.283396508028346	0.248227808763101	0.12840931829854	0.209281076703183	0.247890073318636	0.25061427892435	0.0679016630249486	0.11770216316466	0.161508319529878	0.141916957200249	NaN	NaN	NaN	NaN	NaN	NaN	NaN	NaN	0.217473864656898	0.0303591254844512	0.177774750089723	0.245578415756388	0.0683138082340658	0.0931409678559305	0.251975112544686	0.239581204997348	0.205726757293561	0.0594431358542682
0.263438322038311	0.290773408864777	0.504973288856892	0.74616006541093	0.832812631827123	0.255369621728214	0.262665253869388	0.501936963017299	0.255994639298424	0.788527005167164	0.263633550374015	0.671262470413101	0.790298755767369	NaN	NaN	NaN	NaN	NaN	NaN	NaN	0.253962471319096	0.268243046788505	0.0943246481386079	0.117599967504435	0.0657390532133525	0.24611018805264	0.246579129321864	0.120860636185649	0.254286341143986	0.0780483651814065	0.255272009341497	0.0712187640406919	0.0831927170354359	NaN	NaN	NaN	NaN	NaN	NaN	NaN	0.241242860424134	0.220363652034259	0.113954236786941	0.0806280251942271	0.046471190829385	0.246433617540167	0.248758441845128	0.129334807535025	0.242456820875456	0.0522549898281274
0.271134903515887	0.268012448562069	0.777757589591126	0.89270795196134	0.880961331488505	0.677430612675245	0.875326518522756	0.255977939325866	0.374323709401134	0.834552629146428	0.685538746066793	0.843256794109843	NaN	NaN	NaN	NaN	NaN	NaN	NaN	NaN	0.254436542064855	0.249746621649282	0.130545496007654	0.0461648184591983	0.0491230064933345	0.117963805713511	0.0640439931579045	0.244878730837746	0.0377871435908536	0.0490403814679809	0.160767655221419	0.0717269637176133	NaN	NaN	NaN	NaN	NaN	NaN	NaN	NaN	0.231778155596248	0.239061754884917	0.0451851544312448	0.0374344350628086	0.0369895922231406	0.134892169767792	0.0349308012120997	0.246573354817422	0.0315802952650552	0.0266384118942659
0.866823360301406	0.260825186784053	0.787092201012253	0.583939889765767	0.254353456579741	0.859797307810712	0.787020934918554	0.736568277631127	0.264547575316433	0.692597971344659	0.85203568532695	0.712716920699736	0.725855850213406	0.637348041395142	NaN	NaN	NaN	NaN	NaN	NaN	0.0478729735261997	0.252863221179703	0.0416799069332934	0.0876926155892845	0.245045614169715	0.0640092416639306	0.0976385787272177	0.121525239397094	0.250992815943526	0.173638351311575	0.0602658090087256	0.135966844155962	0.0680387365860259	0.0756732471654294	NaN	NaN	NaN	NaN	NaN	NaN	0.0573000757317514	0.243168576780215	0.106425405593554	0.0851097355647744	0.246795342029593	0.0388864918001421	0.0704875474962407	0.0804018844273442	0.229692209440206	0.0665733570061082
0.764288156460699	0.838410324959428	0.281547213122896	0.826388479751624	0.256421111663122	0.257065123747015	0.623223738320124	0.454738141511823	0.768485381593908	0.271028526154704	0.817209368857702	NaN	NaN	NaN	NaN	NaN	NaN	NaN	NaN	NaN	0.0386397237603041	0.0750728798577057	0.268705441600567	0.0844249215688872	0.248547750483273	0.243572926424728	0.187111653985381	0.0269587119943474	0.0684366426834804	0.256672566271498	0.0726987322509067	NaN	NaN	NaN	NaN	NaN	NaN	NaN	NaN	NaN	0.157971529183737	0.0373844901992549	0.223739496648224	0.0487044171421378	0.247924212870036	0.251923476598545	0.0700240175859278	0.0280829490747168	0.0555460607699081	0.239086957822832
0.273812289157442	0.777546977173798	0.751950938598841	0.907056798119714	0.841541719735434	0.80852789847189	0.803838420066125	0.700766690632942	0.255344846020175	0.667792957375047	0.70581625639779	0.811669011777029	0.625849807258638	NaN	NaN	NaN	NaN	NaN	NaN	NaN	0.261899208412002	0.118245633095308	0.121042528419275	0.0377611460126782	0.0634399244245235	0.087937098553237	0.112331213002726	0.0901310460183013	0.251788331015247	0.114094794122081	0.0546912070265835	0.0760204145504283	0.163378873167943	NaN	NaN	NaN	NaN	NaN	NaN	NaN	0.232306920658098	0.052045145155857	0.0756243410738229	0.0296318457321668	0.0461912985268186	0.053493164854299	0.0352976404509541	0.131732890132913	0.248620865024021	0.0791487883290491
0.744880092812653	0.287697388276696	0.710537515306634	0.745626189960554	0.834585530805667	0.733946674113901	0.258513663213184	0.803701981524327	0.644499692587007	0.770103655447981	0.810266562261124	0.64910936127827	0.712784749264784	0.258704625713249	NaN	NaN	NaN	NaN	NaN	NaN	0.128994779534386	0.271820243798031	0.0940492840733096	0.0835114117394073	0.0848126384943589	0.0834009874971017	0.246651964677221	0.0987522339652453	0.11664754821199	0.100577602151939	0.0751460867068638	0.147449963613858	0.0646080313627349	0.247397830595721	NaN	NaN	NaN	NaN	NaN	NaN	0.076234570563157	0.219928955978348	0.109103653169406	0.124818168974346	0.0369761667698187	0.12413965467182	0.247187315612438	0.0495300517800362	0.0680169999284756	0.0648471020773057
0.717226397818405	0.895095067605906	0.759845712270104	0.825009003731571	0.258442695263969	0.870528318938613	0.902835035220174	0.27244414141619	0.82379776662522	0.696039727113005	0.84605688344054	0.859552399517565	NaN	NaN	NaN	NaN	NaN	NaN	NaN	NaN	0.0784549989189228	0.0232511823170542	0.0595041562753411	0.0974040214992973	0.248118850702183	0.0556851334169844	0.052702234733548	0.252975287448536	0.0889902412483563	0.065383623577117	0.0743794651761102	0.0822972033008137	NaN	NaN	NaN	NaN	NaN	NaN	NaN	NaN	0.105446707571061	0.017357458969314	0.128285777611585	0.035769789613001	0.249977206850567	0.036878061670452	0.0308673408163085	0.237388721693216	0.0429859925676209	0.0934088193005402
0.72986442633097	0.778436201827619	0.836239812728956	0.802585226539022	0.795502181027601	0.472398498721524	0.736964971077932	0.721403302032855	0.814778426961204	0.259788379851709	0.262541458728211	0.889359616772456	0.866013214240143	NaN	NaN	NaN	NaN	NaN	NaN	NaN	0.112815137189663	0.100563957353231	0.0788153452512139	0.106704920840064	0.0909278251832752	0.353383989844276	0.124551393838005	0.088822213776678	0.0917587581019252	0.251305409927407	0.251908935694774	0.0283663124696077	0.0721274193374744	NaN	NaN	NaN	NaN	NaN	NaN	NaN	0.0943417176372687	0.0621318828655536	0.0352353307864319	0.0437613612415924	0.0563800642308829	0.0854300321527877	0.0801289090722801	0.109976713041295	0.0465899445121044	0.243853411177186
0.663368262602314	0.257698523025167	0.612166644867584	0.636502902897438	0.256230856854159	0.572365047802723	0.707497725932927	0.328749481434456	0.831729970419675	0.256331599643412	0.669784144260383	0.805890733751761	0.763054248299262	0.867206640520737	0.74187448622444	0.848501271846176	NaN	NaN	NaN	NaN	0.0845632592205534	0.245199738055455	0.186228148950575	0.0881466185512743	0.246505549062813	0.287439453327032	0.087055938573124	0.28832013099463	0.0658845321374959	0.245301719866362	0.156970686536326	0.065187200189141	0.105600560347292	0.0605263374540455	0.126957729234681	0.0430826152868114	NaN	NaN	NaN	NaN	0.0482732552604231	0.245619223462421	0.101865889032763	0.155752066389758	0.24917423289851	0.0758501769214121	0.0956667407070799	0.19267115786198	0.0451334981636064	0.250138772153613
0.854334256337634	0.708992358852676	0.67721918267868	0.732478579629013	0.586778803984615	0.725557000216691	0.768174493419818	0.870696103859538	0.766764074512045	0.730956323942516	0.712793863304812	0.813816635298576	0.70249980112936	0.813978398100524	0.872904250020897	NaN	NaN	NaN	NaN	NaN	0.0748583050812194	0.139919454610762	0.0911734810218022	0.133111403966508	0.131344254437629	0.0912486437616721	0.103063291846955	0.0432445525421238	0.0963064074315134	0.117226707603142	0.0752978894163238	0.0879985641971916	0.13594328878652	0.0733689753321473	0.0645161752585325	NaN	NaN	NaN	NaN	NaN	0.0341890432392858	0.0713330874751775	0.0929218244328214	0.0659381429933298	0.135891604713921	0.118588942974787	0.0660585199297085	0.0579475344609102	0.0706292864272106	0.0710359888900617
0.265193011120582	0.73310705968345	0.279343553329261	0.852297979571636	0.751406232494631	0.251621993945392	0.732852724522911	0.821737660659917	0.27724981712283	0.767268179742048	0.830274919121233	0.774602192469759	0.265269896002806	NaN	NaN	NaN	NaN	NaN	NaN	NaN	0.253558950350045	0.0502275947483195	0.262132377248122	0.071968918193491	0.0949679670609709	0.248200721539783	0.0950005213335855	0.0782834423829182	0.257802997862794	0.0915310932369428	0.0983796107082628	0.111326334236145	0.251529537146549	NaN	NaN	NaN	NaN	NaN	NaN	NaN	0.239405067593812	0.0654617515138054	0.227650644411662	0.0416289483235778	0.0949105208357559	0.253723783395282	0.0892473452735444	0.0481994026860146	0.234828273392732	0.0786816719633633
0.811103998164229	0.875139865296667	0.726606718601098	0.592899666693983	0.259888404950579	0.723023433680842	0.752324823034772	0.297015320157859	0.255538646608646	0.726643595785083	0.694019353548219	0.744263108464447	0.67211783952428	0.684042293455707	0.688471280465216	0.622729038138903	NaN	NaN	NaN	NaN	0.0897313106512151	0.0627867062351698	0.0946050599961804	0.122050076577968	0.251364416171228	0.132460109792533	0.0856028522864448	0.271187309284518	0.252013341828217	0.101607647955849	0.105150445809101	0.068019050242285	0.126686135890708	0.162633280370636	0.135546188809618	0.0873664897120495	NaN	NaN	NaN	NaN	0.0453615136571568	0.0366010345755253	0.0987392433503489	0.102466656199506	0.244180719565446	0.0860590291392476	0.0713966837437011	0.215771556672606	0.249735155713528	0.0903068110532355
0.268616230905105	0.750928337221789	0.266411950878148	0.564747598190436	0.663150499785642	0.775963522208181	0.745147120437411	0.646108371386417	0.764235852519382	0.821905754485419	0.610256333994796	NaN	NaN	NaN	NaN	NaN	NaN	NaN	NaN	NaN	0.256303855192268	0.0636414836160723	0.255787731110311	0.308153729617517	0.102342290287872	0.0939020856757783	0.104809126820344	0.0816157176069489	0.120752463006983	0.087628290775399	0.0845396300526751	NaN	NaN	NaN	NaN	NaN	NaN	NaN	NaN	NaN	0.237560335639087	0.110859905224404	0.238398270074896	0.0699695711673455	0.111377282306073	0.074247714318731	0.0685432233584212	0.130472273099026	0.0650860497802102	0.0396885969637293
0.269223246481944	0.757484314085171	0.742224831856615	0.790306966078467	0.816778602770851	0.824794426935908	0.727292434558343	0.326692257598459	0.740126129367835	0.746129790291186	0.492249552526226	0.768736726569146	0.585057035414728	0.686770815831677	0.478882819421988	NaN	NaN	NaN	NaN	NaN	0.254595469462444	0.0602393174751187	0.127191451290566	0.0905878077671957	0.0672097188340521	0.0761694659951418	0.118780181702252	0.278880427516784	0.0984590776163824	0.134181937106238	0.0215756383166297	0.0950515541001634	0.0946517878376484	0.166373279023521	0.333473711533517	NaN	NaN	NaN	NaN	NaN	0.240352581413766	0.0681843474087799	0.0733365234693792	0.0521757083496461	0.0783622795032171	0.0406905416511172	0.0736243990736767	0.196647293048713	0.0505981194948256	0.0586104533403519
0.405015076007168	0.262927007669544	0.815240415769685	0.609092260113145	0.78618247199058	0.281976784481535	0.260557340258061	0.809761442456012	0.255560463559682	0.256824625665535	0.736450917155051	0.256391364824323	0.657631395468599	0.26193890669747	0.686990419468617	0.256959266595301	NaN	NaN	NaN	NaN	0.317317221950877	0.252627843243657	0.036372324560243	0.197767586027836	0.0512266840905357	0.265743450487363	0.248676457224867	0.063023701598569	0.250967205117751	0.249369196508552	0.0890567733316062	0.247712753112512	0.14331295721223	0.252690952681656	0.123531220408403	0.252280216342249	NaN	NaN	NaN	NaN	0.138472447172894	0.242189931254118	0.127867713232479	0.105144632777102	0.0950658209848917	0.225647467400107	0.245170322057342	0.0950384805281657	0.248094402961715	0.241659991141726
0.380611410692088	0.724383239877639	0.262047186941443	0.288410413035276	0.785113740223818	0.831304684693144	0.777300993023186	0.683972342236906	0.255433238648856	0.256288341842877	0.255028010394869	0.259715394248179	NaN	NaN	NaN	NaN	NaN	NaN	NaN	NaN	0.260679543428245	0.0781177908081264	0.252214119651016	0.257965277766239	0.103817471410423	0.0776972500599726	0.110068640097025	0.142443329058821	0.251267395648179	0.248120802210671	0.246143418918543	0.252848525985085	NaN	NaN	NaN	NaN	NaN	NaN	NaN	NaN	0.169677784725251	0.143083150569781	0.243032336351488	0.228693990854071	0.0425323070778669	0.046941774489029	0.0599091716802821	0.0857558125811265	0.247052478178687	0.244220671960272
0.594207244930245	0.329460355531994	0.273788811053154	0.696626961664076	0.257955490380361	0.717348982885192	0.315336224645375	0.258524537152863	0.256180452862904	0.730076446788306	0.25936804606587	0.748285031553093	0.262825856849348	0.720735071633378	NaN	NaN	NaN	NaN	NaN	NaN	0.105787187990859	0.278764023922721	0.254326673591716	0.0616144091793545	0.246047102042418	0.134957100497943	0.286836054946924	0.252020620563227	0.249560833935954	0.1247394399715	0.248797463105251	0.0991454138809854	0.255251697442066	0.123174226008927	NaN	NaN	NaN	NaN	NaN	NaN	0.10257617297442	0.195180752565701	0.237305337018072	0.153071825001308	0.240301561593868	0.0707843825654805	0.197907320541672	0.246460007530036	0.251845422335832	0.0705809960782644
0.811002111304809	0.28508291413616	0.353327965076239	0.755694690821933	0.566864269207777	0.787620669295551	0.784971590166959	0.790999263198177	0.750944575254706	0.685367283042371	0.255386034965192	0.549765150946865	NaN	NaN	NaN	NaN	NaN	NaN	NaN	NaN	0.0757997418653783	0.268572671733955	0.291336292968826	0.0788432863660159	0.117390016596911	0.0982860504292602	0.100213009078325	0.0711508085991775	0.115202795043972	0.143435455636834	0.243641954562333	0.115486833725777	NaN	NaN	NaN	NaN	NaN	NaN	NaN	NaN	0.0492730670766954	0.223414923293028	0.177604695760326	0.0546436902641985	0.228568264227295	0.0572139779918488	0.0560176285524766	0.0697684143390719	0.0639443991390195	0.079323708598818
0.714225371621116	0.644900018746284	0.270925803316528	0.813297348905088	0.544252567846291	0.716696947178507	0.694998587741398	0.630677158478309	0.260117574751635	0.622265731242459	0.799619185542442	0.257107668230073	0.533522316776755	NaN	NaN	NaN	NaN	NaN	NaN	NaN	0.145352082584621	0.0963399000733083	0.2589361963824	0.0815066925500303	0.0499505972433933	0.060794007365657	0.146438949262352	0.0818555782225015	0.250121394657606	0.190129866663094	0.0804298429759041	0.24726681877977	0.240648881372796	NaN	NaN	NaN	NaN	NaN	NaN	NaN	0.0749626472785541	0.0829751025838107	0.233259673220415	0.0598820141120707	0.352323780317189	0.151918662035774	0.0799819213001153	0.234781678960237	0.240873442222906	0.0880668696380188
0.706342518400402	0.698030092543124	0.821677327675822	0.253411252462395	0.682864924820108	0.767913653110157	0.781101793158708	0.684518558929537	0.788251019807684	0.720187474647669	0.796555997841807	0.265532998141127	0.254430726866693	NaN	NaN	NaN	NaN	NaN	NaN	NaN	0.076668629709222	0.146369754030268	0.0505547494392124	0.24710024028753	0.0823010757571408	0.105607028975136	0.117590100815712	0.130893007368896	0.0995980462756229	0.174153301538539	0.0930330557538076	0.261281243932623	0.245879206003924	NaN	NaN	NaN	NaN	NaN	NaN	NaN	0.177396933292488	0.0815085357734065	0.078605907394611	0.249065075586652	0.164852762092053	0.0614036278008221	0.0604434063505888	0.0837054500630383	0.049484539128846	0.0463970972938788
0.855639501151997	0.692014505518426	0.631382738386747	0.877476656793369	0.660824112421993	0.833984882496239	0.593275013688411	0.280742817966362	0.737859115357838	0.604703764286463	0.777311482277668	0.771597507700016	NaN	NaN	NaN	NaN	NaN	NaN	NaN	NaN	0.0594576928264884	0.150420399268697	0.107041713245499	0.0428469611308552	0.154005627152029	0.0420271840079881	0.212444065058899	0.268597241685506	0.0867832675595933	0.214470487884934	0.109621069782275	0.0781224880376996	NaN	NaN	NaN	NaN	NaN	NaN	NaN	NaN	0.0314427768614474	0.0810246469339963	0.201021398162689	0.0353911640137016	0.0929072393563665	0.0948244154932232	0.101670624227052	0.225171852045132	0.108697078966891	0.0672455199156396
0.807003401519712	0.77984692126996	0.77650264132625	0.791529918025454	0.746228839164846	0.861765132878389	0.782308607494748	0.788084951177507	0.802547085138109	0.605780640794601	0.836101147148163	0.702238527066024	0.610808871053261	NaN	NaN	NaN	NaN	NaN	NaN	NaN	0.0920828121120697	0.122472198883055	0.0617301065766089	0.0749154438617104	0.11941611822087	0.0650642014996246	0.0917872071636866	0.0741931258637782	0.096602925526877	0.200113171672446	0.0788164001130156	0.137697575980515	0.176706716267089	NaN	NaN	NaN	NaN	NaN	NaN	NaN	0.0503225321698283	0.0419611058985161	0.0704830871724043	0.0929874497562498	0.0660257486408608	0.0341561869634855	0.0694417401114384	0.090602563609771	0.0493757339559399	0.0950866238202234
0.861955157777545	0.690188684511786	0.826351314351281	0.708909984383069	0.773081603637902	0.725905855298054	0.747515285492322	0.758191469964268	0.631484785851827	0.8931175381974	0.724581138969066	0.736996869521963	0.258825478890272	0.85435135474526	0.841159570142375	0.729825756325784	NaN	NaN	NaN	NaN	0.0625429100728547	0.062107420874926	0.0566478812077477	0.145497933643224	0.0729332582041154	0.065902780980829	0.130340461511588	0.0579149676502142	0.099359665773127	0.0387817772378177	0.118412634521094	0.0993807915367468	0.250788838615555	0.0526358668562563	0.0711816932892376	0.135907909841327	NaN	NaN	NaN	NaN	0.0348149403841604	0.198396188273322	0.0588168017386429	0.0798529890570143	0.113458290397101	0.164373865804468	0.0652708980278974	0.078186195565472	0.162062690592886	0.0398071161628424
0.261735202467453	0.740181292012029	0.779137838664115	0.365441379848793	0.520541250610458	0.821752861499528	0.79012653211163	0.256543677727104	0.749316101553896	0.583493045665742	0.716167256665953	0.812191793443961	0.494390660634815	0.67151425371997	NaN	NaN	NaN	NaN	NaN	NaN	0.252445806892076	0.0795191043172025	0.112330602776265	0.0447850069624052	0.173554741342912	0.0738580657182164	0.101116368820105	0.246668969732481	0.0839063711376073	0.191264129459769	0.110635012152965	0.0543596861257292	0.300369979781991	0.112375892734581	NaN	NaN	NaN	NaN	NaN	NaN	0.2386741853129	0.0710406301642471	0.0546378945071202	0.0435565256601121	0.15163177318893	0.0443124789728169	0.0722427080220034	0.248537959471562	0.0925835976005576	0.134654135478419
0.794359635684336	0.747303616308169	0.298806667400769	0.770305635837661	0.717189715383537	0.792504403898869	0.812636516401232	0.635795923211027	0.692766651622004	0.780041963878899	0.784018444102764	0.741979427591605	0.872992028847924	NaN	NaN	NaN	NaN	NaN	NaN	NaN	0.0178980695910875	0.0940095337048056	0.277159840261356	0.107757391608732	0.0965861838204112	0.0875021970470722	0.0666092005814512	0.104419570303857	0.123114521160859	0.112565650472944	0.0670432018440399	0.0737078799315585	0.0494939356025782	NaN	NaN	NaN	NaN	NaN	NaN	NaN	0.0317368333324226	0.106726517330884	0.21107174749914	0.0603976663968886	0.125125421372554	0.0589860241685594	0.039918781853921	0.212992162348113	0.0762661312769536	0.0566731913744484
0.811193386362336	0.523958471579978	0.78737562031147	0.782574130603814	0.63154928272921	0.257825055814333	0.84570071891869	0.261381310429984	0.589881037783603	0.690131349555753	0.332330957637273	0.645529651524335	0.737776474491104	0.63068636615202	0.759286836515356	NaN	NaN	NaN	NaN	NaN	0.0909202116895406	0.205488242130389	0.0800401791497012	0.100631863630391	0.124928521546588	0.250742123932223	0.0760364939363027	0.25186298971064	0.135539461682132	0.181689300559358	0.274837158202507	0.153263706989301	0.108746524880987	0.105188936690958	0.0996006391265932	NaN	NaN	NaN	NaN	NaN	0.0480842892876396	0.17003400156187	0.0898848889803888	0.0608049502528725	0.0971104483279958	0.243379145181514	0.0391168958111969	0.244058306910261	0.0674976525825465	0.0410252441512539
0.737276844975301	0.758955373025855	0.846483187716261	0.723812085395653	0.727942927265179	0.762133311657502	0.257033106047195	0.71275510030581	0.809837740023631	0.257153859784445	0.719615135989451	0.252537132223913	0.70576507929559	0.733066007911602	0.256240691810116	0.259525953798769	NaN	NaN	NaN	NaN	0.1139799844342	0.0396688343031357	0.0760050302412017	0.133789786006328	0.149583286096776	0.125145693730707	0.251261068827329	0.150964769361733	0.0860241557689501	0.249838968127529	0.0619328426557995	0.247610240902262	0.119724662985806	0.0765558896623569	0.247727245541848	0.252815888909037	NaN	NaN	NaN	NaN	0.0583570625322083	0.0361640603566006	0.0353115345619778	0.070872689938895	0.0691893345642128	0.0766798426678914	0.244054232617372	0.0735972995996548	0.0524692871001361	0.249967272883495
0.252028128707895	0.596714864286016	0.290037298440081	0.489193692887821	0.692001233289024	0.27228039572813	0.856305889345525	0.789651578070382	0.814733964344025	0.749939318621334	0.78439125019169	0.691290055924888	NaN	NaN	NaN	NaN	NaN	NaN	NaN	NaN	0.24842814153387	0.152071335555727	0.264510725719511	0.0289727184991817	0.0982628653633655	0.261948623278841	0.0737451020473319	0.103323737236687	0.0789273375809817	0.0458339078251307	0.102787996636473	0.0923317282452156	NaN	NaN	NaN	NaN	NaN	NaN	NaN	NaN	0.2447729878911	0.121620679423775	0.225216338071402	0.10340191784174	0.118445617580278	0.232912564497034	0.0363783527840398	0.0537833585156341	0.0753930077333566	0.0557086599786905
0.720245585353249	0.758996648225288	0.268708400514565	0.252981079837745	0.735856615195194	0.308319515833156	0.832782589712237	0.750129041275885	0.829763796223152	0.789361202425062	0.720682110327749	0.561744428372885	NaN	NaN	NaN	NaN	NaN	NaN	NaN	NaN	0.106456927722323	0.118102043284373	0.251018813953337	0.247846186785632	0.120255491388195	0.27042400019366	0.0607452415260547	0.143122361717107	0.0650530578198371	0.101421485462141	0.109471804088599	0.132862642598923	NaN	NaN	NaN	NaN	NaN	NaN	NaN	NaN	0.0709017941863683	0.0615222789753694	0.246390911696365	0.247391174239687	0.0873170410672517	0.206697260831079	0.0585063806988905	0.047178578102078	0.0521703417315343	0.0551283191813999
[truncated: 30 more columns]
