# Supplementary material for: Value signals guide abstraction during learning
Source: eLife. 2021 Jul 13;10:e68943. doi: 10.7554/eLife.68943 (PMC8331191; doi:10.7554/eLife.68943)
Supplement: Figure 2—source data 5. [file elife-68943-fig2-data5.csv]

vv	ls
0.0913567111464793	0.609347442680776
0.0643971193048587	0.769753086419753
0.0837195443324302	0.613168724279835
0.135055521040243	0.534979423868313
0.0702134605805475	0.584362139917696
0.0711208224943471	0.632275132275132
0.108193171808493	0.599326599326599
0.0500029745302722	0.653371320037987
0.0687362908748696	0.674603174603175
0.0596999113845724	0.520576131687243
0.0637531944302364	0.633428300094967
0.0793873647698807	0.661265432098765
0.035754844811074	0.674897119341564
0.112699368878479	0.593542260208927
0.061769554455683	0.70216049382716
0.0738459432917279	0.538720538720539
0.0516757427462017	0.640329218106996
0.0681404051341172	0.652263374485597
0.0819090602502913	0.705603038936372
0.0845964484159445	0.62962962962963
0.0490910496831384	0.593621399176955
0.0390789280863591	0.653371320037987
0.040941916361831	0.699845679012346
0.0549756539698094	0.686067019400353
0.0387002458401589	0.644824311490978
0.0700015027262049	0.662551440329218
0.0975799868126234	0.733024691358025
0.077682269839388	0.616255144032922
0.0749005834544689	0.631687242798354
