# Supplementary material for: Value signals guide abstraction during learning
Source: eLife. 2021 Jul 13;10:e68943. doi: 10.7554/eLife.68943 (PMC8331191; doi:10.7554/eLife.68943)
Supplement: Figure 3—source data 1. [file elife-68943-fig3-data1.csv]

L_8s	L_4s
54	19
22	8
23	34
34	20
26	22
30	13
27	31
40	26
8	8
16	50
10	27
17	9
16	16
22	14
13	12
20	14
19	24
19	14
29	26
41	30
21	22
30	14
15	15
11	9
51	24
16	18
26	47
15	31
29	16
46	16
23	18
28	21
37	11
19	23
9	8
18	25
21	37
76	32
38	39
23	15
36	20
12	35
15	24
41	9
27	31
40	19
9	8
26	19
23	20
23	28
26	33
27	21
33	16
9	9
15	44
25	19
18	48
23	45
53	11
14	47
15	32
29	18
58	39
22	17
79	26
20	29
34	23
26	23
10	10
39	25
63	9
9	31
30	33
18	28
25	11
28	19
15	16
14	10
20	18
9	28
28	14
33	53
46	25
49	34
16	22
29	12
14	9
33	10
11	27
16	13
16	18
22	8
36	10
18	34
59	26
12	9
26	12
51	54
27	8
18	16
26	19
55	10
26	10
23	13
37	12
27	14
24	17
17	19
23	31
28	22
63	45
24	17
39	41
9	11
21	22
50	21
61	21
28	18
20	23
12	9
57	80
25	14
20	14
42	25
10	10
37	80
31	50
38	17
22	38
38	31
23	13
22	26
17	16
45	10
26	46
68	30
8	9
25	27
57	26
69	20
20	11
26	12
41	23
10	22
16	38
34	9
56	17
28	15
31	13
11	36
38	17
23	16
25	16
39	24
25	42
26	25
19	16
18	22
10	11
44	22
18	26
26	9
30	14
23	45
16	17
31	34
37	32
47	17
13	39
10	8
37	53
14	31
58	40
23	32
28	43
38	22
14	36
13	9
27	20
20	30
19	20
32	44
27	12
71	12
24	25
35	11
26	13
50	34
10	22
15	44
9	10
29	31
46	25
11	28
50	16
32	37
72	11
28	46
18	15
31	56
78	33
34	24
29	24
9	11
17	18
18	22
70	14
42	80
21	18
16	21
35	35
48	13
22	23
23	16
28	9
57	47
80	32
52	20
34	16
57	55
24	12
21	16
39	17
34	19
15	27
35	19
9	20
13	25
32	20
23	25
24	23
80	13
30	72
8	8
34	18
9	17
16	13
31	53
41	30
14	11
15	14
45	24
27	13
40	17
27	19
22	29
64	46
28	14
11	10
40	23
70	29
59	69
25	17
31	29
45	18
72	32
53	25
20	80
30	13
9	8
25	43
36	15
64	20
38	46
33	17
31	18
37	41
25	15
27	10
19	16
31	30
9	8
20	37
24	29
23	17
31	42
33	28
68	50
8	9
16	12
26	17
35	11
45	18
32	29
36	19
17	14
37	25
31	14
43	16
53	29
80	28
36	23
31	17
9	11
18	21
20	38
24	11
19	14
39	24
10	10
74	32
25	27
34	21
13	13
10	10
36	21
21	14
37	21
25	14
30	13
33	17
12	31
24	27
32	32
34	23
15	14
9	9
26	11
25	28
62	27
11	12
14	30
23	15
10	8
48	12
12	11
34	15
36	13
45	25
14	9
38	10
37	26
52	49
27	30
41	17
36	23
19	28
18	15
9	9
30	24
58	21
37	21
42	17
33	32
11	9
80	50
26	15
21	25
18	22
9	9
16	25
80	18
40	28
31	17
36	17
35	14
11	12
10	69
9	24
32	13
34	21
9	27
17	29
60	34
67	31
27	30
38	33
63	15
10	9
31	12
11	20
37	29
65	58
21	25
37	12
35	31
15	23
42	17
16	19
25	34
35	37
19	14
37	42
9	9
20	18
19	17
58	20
29	22
26	34
73	23
33	23
26	14
78	38
67	22
9	9
34	42
11	9
35	16
25	16
15	15
16	30
34	12
51	19
29	39
30	21
18	23
8	20
36	13
27	19
23	20
28	20
12	11
39	21
23	8
14	18
11	24
29	32
25	30
11	11
31	11
74	14
43	16
49	57
43	20
28	18
21	21
30	34
14	12
10	10
40	35
42	26
57	31
15	14
24	18
11	14
49	20
25	12
21	31
33	12
29	10
32	31
11	27
35	31
23	14
20	13
33	18
20	50
33	12
39	23
17	20
78	42
8	33
19	49
67	36
22	31
10	18
58	11
52	15
10	10
16	12
23	11
38	31
27	16
34	23
12	13
44	9
23	10
23	24
30	23
28	30
26	20
37	22
25	48
8	11
21	30
17	19
23	37
34	17
23	19
21	16
27	17
15	23
24	21
20	13
37	9
32	21
11	21
17	29
32	14
18	21
23	33
33	32
43	27
9	29
66	14
47	25
8	22
53	11
41	20
35	19
27	11
15	11
24	16
8	8
75	40
11	22
20	10
29	33
45	11
30	11
43	10
25	15
37	24
23	39
30	30
21	23
19	14
60	15
11	8
80	32
27	12
32	10
23	28
25	21
12	20
44	24
43	41
61	12
12	28
10	31
37	17
15	18
29	17
38	17
16	19
37	15
13	9
34	14
11	18
36	25
15	23
32	9
24	24
48	44
40	30
13	14
33	29
60	15
23	8
16	17
47	44
54	19
25	14
57	14
29	12
26	17
21	13
48	41
29	37
29	26
28	22
37	38
18	29
11	10
21	36
16	9
34	27
57	14
61	32
12	11
51	28
36	14
64	41
18	16
62	25
16	24
50	60
49	24
59	33
41	19
35	13
13	23
52	34
54	27
44	12
28	40
9	8
54	24
25	21
31	29
37	20
35	11
22	20
10	10
15	16
9	18
18	45
32	21
42	26
10	26
41	14
22	20
51	30
16	22
66	30
48	32
73	24
17	14
8	10
21	11
20	24
39	29
25	23
37	29
76	31
36	43
38	15
36	19
27	27
10	8
14	52
20	11
46	25
24	23
22	30
62	33
10	22
22	32
9	12
19	26
17	19
26	38
35	12
51	18
42	30
22	13
14	24
73	69
8	22
16	14
12	9
19	13
38	17
14	13
37	24
21	35
16	12
18	31
24	18
33	26
17	28
16	24
65	21
9	8
41	24
25	9
36	20
30	28
35	28
17	15
55	42
17	23
33	13
31	12
25	31
17	26
12	22
19	25
25	33
15	23
25	35
25	12
12	64
9	18
45	32
46	22
40	9
32	35
25	18
56	20
41	11
19	12
25	37
8	10
15	13
9	11
33	12
27	44
11	12
12	31
12	17
14	13
31	29
17	51
45	21
25	36
37	16
17	37
9	8
80	25
21	23
50	20
18	15
22	61
36	31
38	61
25	18
30	13
25	28
9	9
40	19
14	41
51	19
23	22
18	17
36	42
27	36
32	18
22	39
22	37
21	29
23	9
33	21
73	21
47	38
25	14
25	23
55	18
9	8
36	44
55	12
17	14
10	35
23	14
12	12
15	29
22	16
42	39
39	13
37	26
78	21
17	35
41	30
10	9
24	30
24	19
27	9
16	33
34	19
18	47
26	30
39	26
24	21
20	32
49	8
31	14
14	11
26	34
37	24
35	12
22	12
37	16
43	12
11	11
30	31
29	21
9	20
36	21
55	12
45	32
17	38
50	20
60	20
9	9
33	12
11	11
75	35
20	14
27	55
36	23
15	43
15	21
24	32
14	13
53	64
45	26
29	21
27	20
9	11
80	23
19	16
25	18
15	13
27	17
25	12
25	24
32	12
60	55
43	12
39	30
17	11
31	23
17	22
22	40
21	12
31	57
19	19
23	14
71	11
18	36
49	20
26	8
32	12
19	19
39	54
33	20
25	31
32	22
8	8
30	74
42	35
18	22
26	28
20	32
19	37
32	16
21	13
24	15
20	16
39	32
37	21
32	25
17	12
8	9
38	25
16	17
37	19
15	24
49	34
26	20
25	35
16	15
80	16
20	16
8	9
37	38
24	9
15	25
34	25
19	15
33	20
22	14
13	25
26	31
54	12
41	16
33	20
30	25
49	20
22	18
30	18
36	21
24	15
10	10
17	18
25	9
31	17
38	23
23	22
13	58
16	15
28	20
28	26
44	40
39	19
23	33
32	22
17	19
9	10
37	13
16	37
28	23
17	16
32	17
15	30
24	17
16	40
64	45
18	14
9	10
18	15
10	16
68	29
57	43
18	19
36	27
32	39
16	18
28	18
15	13
29	23
22	20
49	16
49	20
28	31
12	27
12	28
23	36
10	39
50	16
12	11
15	31
15	14
28	25
12	14
37	40
13	16
20	44
24	18
26	28
48	16
35	15
27	13
10	11
22	36
24	19
25	26
15	14
32	24
12	43
45	29
40	17
43	13
14	23
9	10
19	40
57	10
48	30
36	23
35	18
58	29
41	34
20	15
36	19
17	39
28	27
8	39
64	10
40	49
42	62
22	23
12	25
24	22
8	8
35	25
26	17
17	31
31	16
21	23
9	14
17	15
13	10
24	28
18	15
27	19
34	15
41	22
66	29
10	8
23	21
39	26
60	35
15	17
61	30
14	9
24	80
18	34
36	36
18	10
9	10
33	14
35	30
19	26
46	16
55	13
28	24
46	40
49	17
9	11
25	11
75	33
9	20
18	19
21	28
25	19
32	37
20	21
33	31
9	10
42	12
36	34
28	19
63	20
33	43
14	33
36	16
29	10
53	26
15	34
16	53
21	25
40	37
16	13
11	11
32	12
17	27
34	39
25	14
28	35
38	19
40	23
14	20
18	21
29	29
8	10
19	26
12	17
29	16
23	22
21	34
64	26
12	35
18	46
12	22
23	15
36	34
8	29
25	16
23	18
25	32
44	15
18	38
31	22
44	9
21	14
11	11
15	10
28	15
29	14
10	12
38	31
27	12
20	15
16	17
25	33
27	21
37	16
18	13
11	11
45	24
31	10
25	16
31	14
20	19
25	19
34	22
44	20
23	19
14	28
9	9
37	25
51	29
16	38
46	32
59	25
42	14
53	12
27	17
9	52
16	27
32	15
8	21
18	22
58	63
22	35
72	12
24	35
30	23
9	8
36	30
25	11
22	31
30	18
46	40
11	12
31	14
30	25
46	18
34	24
32	32
21	15
36	15
54	26
10	8
19	19
24	12
37	36
32	17
32	16
23	19
23	42
35	16
37	32
48	10
10	8
33	13
17	11
16	31
22	14
35	58
34	13
20	20
13	12
11	10
16	13
36	18
50	21
21	12
60	24
42	39
21	35
33	15
42	18
23	40
16	20
80	32
41	16
36	28
41	11
13	14
32	15
22	21
31	49
17	36
27	32
35	33
37	41
69	18
8	10
25	14
19	24
33	23
42	29
26	19
23	18
24	39
52	15
27	10
29	28
8	10
36	21
12	9
36	80
25	17
21	14
31	29
28	33
18	18
30	18
27	29
19	26
31	9
71	12
33	36
59	28
35	20
19	12
32	39
10	8
48	41
24	39
31	22
27	31
20	50
12	36
34	17
23	27
20	44
36	14
45	23
30	30
52	41
46	13
11	10
49	26
16	38
36	34
14	13
52	17
39	69
80	79
26	34
51	31
19	17
8	10
45	14
11	9
28	46
37	16
38	17
42	14
30	26
14	14
45	10
15	14
29	32
44	9
35	36
80	24
37	22
45	10
13	30
38	19
9	8
15	15
26	10
18	33
48	30
21	12
36	14
17	16
26	10
18	14
40	21
30	27
36	15
52	47
18	44
11	10
17	13
39	10
24	21
34	16
26	16
12	16
27	41
15	13
30	22
29	27
9	9
18	25
21	12
58	43
25	16
45	23
55	43
26	18
33	31
35	11
19	13
22	20
8	21
31	25
29	20
29	18
26	29
12	11
48	16
10	10
18	14
51	12
21	18
58	33
38	12
11	28
26	28
20	32
21	16
51	36
27	19
38	34
33	16
23	17
9	8
17	19
41	38
24	32
25	15
39	28
24	21
35	17
16	20
29	29
30	10
10	9
32	18
31	9
29	45
43	22
25	16
29	35
19	22
57	24
9	11
15	14
20	33
49	8
17	13
18	33
22	18
38	38
20	11
33	37
8	10
14	13
32	11
17	17
36	13
21	12
11	39
15	11
30	10
20	16
17	14
26	36
42	26
77	34
24	43
9	8
23	22
19	12
37	11
17	16
39	50
16	25
34	23
34	20
16	27
14	31
8	10
16	23
14	11
28	18
22	15
35	18
29	37
20	25
15	12
35	9
18	64
58	13
8	8
17	21
20	18
35	29
41	11
20	14
42	45
8	9
34	18
28	26
21	39
27	17
23	20
15	10
41	11
37	22
25	31
52	31
30	22
21	16
47	16
62	38
10	9
30	27
16	22
35	53
24	16
52	16
39	12
26	35
23	12
50	39
29	18
8	9
20	14
32	17
30	21
23	22
20	19
20	16
32	12
18	17
40	28
37	46
27	15
62	9
18	31
41	32
29	29
20	9
15	12
53	22
36	22
17	14
9	23
53	23
69	15
23	14
13	35
17	33
23	13
31	29
67	15
32	32
70	21
23	18
35	19
11	8
30	11
25	27
39	24
22	13
34	80
10	19
22	30
38	17
38	29
17	49
10	22
50	54
17	11
49	80
23	16
18	15
22	49
34	9
25	16
9	10
57	13
18	39
8	39
36	39
18	18
24	29
12	48
18	29
22	21
10	35
30	12
11	10
31	20
15	36
21	23
14	36
35	38
20	44
65	21
17	28
31	21
36	15
56	25
25	34
10	8
26	28
17	25
80	34
28	15
37	18
18	10
46	19
24	29
24	33
20	64
9	8
30	25
11	11
49	29
25	17
25	30
14	38
38	23
12	12
27	50
20	13
34	58
8	27
49	27
23	34
43	27
21	19
38	12
35	23
8	10
61	27
11	40
16	12
28	35
22	20
12	14
14	16
22	25
19	16
74	30
29	48
23	29
64	26
39	12
8	9
21	24
25	25
42	25
16	25
33	68
9	24
22	29
16	19
40	12
21	31
10	10
26	75
16	13
52	19
22	35
28	22
15	14
21	21
17	14
28	9
20	12
20	16
23	23
17	32
20	36
27	24
41	10
31	20
35	22
8	8
31	16
47	19
17	22
44	32
23	20
9	11
16	12
21	19
37	28
22	15
51	19
38	26
17	26
16	34
9	11
61	34
19	34
54	19
18	13
30	28
10	19
55	52
14	18
44	58
30	28
10	10
37	26
10	14
53	20
24	33
22	13
62	60
21	27
22	26
53	27
22	12
18	15
23	9
17	32
46	31
25	34
23	27
25	14
31	17
8	9
26	15
12	17
14	21
27	12
22	14
31	11
31	27
19	23
64	19
19	23
34	18
22	14
31	24
28	19
11	10
54	21
42	11
48	49
48	15
33	45
23	26
53	36
22	22
22	22
14	22
8	8
34	28
38	17
39	10
23	32
16	15
17	47
14	16
38	67
27	20
27	21
32	37
9	41
22	34
45	42
42	26
10	27
31	24
50	80
46	9
17	36
28	9
47	31
38	25
21	33
10	10
14	48
15	10
25	75
36	13
26	20
44	17
35	33
42	19
9	11
35	23
19	11
80	26
17	15
21	34
16	30
52	23
21	14
37	54
19	45
45	8
40	14
80	15
19	19
15	25
30	31
25	39
40	32
42	16
80	24
18	46
28	17
9	20
20	10
20	48
22	17
29	28
24	13
17	25
42	8
28	27
19	11
34	13
22	30
48	13
31	12
16	12
26	18
41	31
16	32
20	21
46	19
49	80
15	16
11	10
39	31
25	17
39	20
29	31
52	32
25	16
37	15
43	15
36	25
32	21
8	9
14	15
12	39
26	31
25	15
17	36
31	20
20	16
32	17
20	21
80	13
56	17
38	9
20	34
44	80
27	26
11	17
14	22
80	24
8	27
16	46
11	11
22	16
35	15
33	20
10	11
17	17
17	24
20	30
23	23
28	19
73	59
21	23
30	12
11	10
30	24
41	24
22	17
32	27
27	19
21	22
33	21
57	37
40	21
19	39
9	9
38	46
12	19
30	10
36	22
21	21
80	33
10	12
12	16
21	28
26	23
28	46
27	46
30	13
44	19
28	35
34	15
19	40
22	61
8	9
51	25
9	20
29	10
20	14
21	25
32	33
15	31
15	12
40	33
52	16
19	39
26	16
40	46
16	13
11	8
18	17
21	17
25	19
15	40
31	23
21	19
80	36
32	12
34	35
35	15
10	9
35	15
59	21
31	28
32	14
32	14
24	30
41	27
13	18
26	9
21	14
59	13
22	8
45	22
47	19
31	21
22	26
12	19
34	25
23	10
25	15
10	12
17	17
32	11
23	26
14	49
20	9
27	65
41	13
15	20
30	44
51	17
30	25
16	26
11	9
25	30
45	24
53	29
16	22
20	51
10	45
32	42
13	20
19	18
34	15
9	8
76	30
13	17
44	10
24	14
17	47
16	28
64	26
41	15
9	9
18	26
33	26
8	21
65	21
28	33
44	20
13	11
15	30
55	19
9	29
15	15
12	10
32	20
27	25
40	12
11	11
15	14
20	39
32	33
20	26
26	17
22	14
80	62
25	38
11	10
80	30
19	36
42	24
23	24
22	24
23	43
27	66
15	13
36	24
20	20
8	8
28	44
37	15
14	10
40	23
15	23
17	13
54	22
19	15
11	9
39	12
25	13
23	9
24	10
21	15
55	22
12	31
35	25
34	23
9	28
49	25
26	12
17	16
37	35
29	43
13	16
56	10
19	13
32	45
31	15
27	21
25	22
27	33
29	19
10	9
19	42
18	22
24	32
60	20
25	20
20	41
61	28
37	21
23	80
19	10
9	9
39	24
33	22
30	28
22	31
42	17
28	69
36	9
13	46
27	19
18	21
17	15
68	45
30	34
18	18
34	20
37	25
37	21
25	21
8	8
15	14
12	54
36	12
26	14
22	30
29	48
14	11
58	25
34	30
25	37
43	18
23	14
19	22
26	49
11	8
44	11
65	12
24	39
38	14
18	22
22	11
59	61
25	20
43	25
21	20
10	55
32	14
13	24
21	26
33	17
35	12
13	16
12	15
16	24
26	40
38	30
33	38
33	30
26	10
61	27
24	32
22	20
24	12
32	17
23	10
34	63
18	26
17	31
32	33
33	46
14	30
32	12
23	42
32	34
37	27
[truncated: 88,001 more rows]
