# Supplementary material for: Value signals guide abstraction during learning
Source: eLife. 2021 Jul 13;10:e68943. doi: 10.7554/eLife.68943 (PMC8331191; doi:10.7554/eLife.68943)
Supplement: Figure 3—source data 3. [file elife-68943-fig3-data3.csv]

MF_m1	MF_m2	BL
0.999999503818106	4.961818943675e-07	80
0.999782221984394	0.000217778015605727	33
0.999544691264972	0.00045530873502837	78
0.997815083799769	0.0021849162002313	80
0.999906975609229	9.30243907708586e-05	79
0.998052378810194	0.00194762118980615	48
0.999987967523764	1.20324762361298e-05	79
0.999452982225121	0.000547017774878834	63
0.996788769322352	0.00321123067764832	80
0.998042944004914	0.00195705599508557	57
0.966002342556985	0.033997657443015	75
0.999872569227423	0.000127430772576598	76
0.985029072452934	0.014970927547066	55
0.9976093835678	0.00239061643219986	57
0.99958909444761	0.000410905552389858	80
0.999719150203327	0.000280849796672858	53
0.99994589269506	5.41073049398628e-05	80
0.99821015654976	0.0017898434502404	64
0.998535573534466	0.00146442646553373	59
0.998788474285499	0.00121152571450094	78
0.998568424350978	0.00143157564902194	55
0.999051839470675	0.000948160529324549	80
0.999434588701763	0.00056541129823642	38
0.999723963444677	0.000276036555322602	80
0.999876446662419	0.000123553337580686	79
0.998529156631224	0.00147084336877634	41
0.996217362537063	0.00378263746293719	38
0.999720353435783	0.000279646564216593	55
0.99405303719195	0.00594696280805016	80
0.989913992183031	0.0100860078169692	80
0.998511523620374	0.00148847637962626	40
0.999332282781059	0.000667717218940839	80
0.98709396339647	0.01290603660353	72
0.99964198155789	0.000358018442110206	55
0.998461303917482	0.00153869608251804	31
0.999506058610953	0.000493941389047446	44
0.999809746673961	0.000190253326038769	80
0.999954566800665	4.54331993353663e-05	74
0.99761987671431	0.00238012328569059	42
0.997721663486639	0.00227833651336062	39
0.99207244745368	0.00792755254631998	53
0.999922433667665	7.75663323349907e-05	41
0.999962923170132	3.70768298678759e-05	43
0.998998898565299	0.00100110143470065	52
0.998246023305336	0.00175397669466364	56
0.999160727406767	0.000839272593233425	49
0.996527343448957	0.00347265655104249	36
0.999926149539785	7.38504602146677e-05	65
0.998207483715222	0.0017925162847776	41
0.998570437572848	0.00142956242715174	64
0.999583705898609	0.000416294101391117	57
0.997786030492426	0.00221396950757389	57
0.999894937966165	0.000105062033835441	47
0.998864387450307	0.00113561254969278	35
0.999738681929588	0.000261318070412183	46
0.999164079721383	0.00083592027861731	34
0.996440949756911	0.00355905024308896	43
0.999766229853332	0.000233770146667662	45
0.999763771651619	0.000236228348381522	36
0.9990931065441	0.00090689345589966	37
0.999559750502157	0.00044024949784258	45
0.99982660049265	0.000173399507350332	52
0.999716171319297	0.000283828680703403	54
0.999656094295984	0.000343905704015697	36
0.999851001600093	0.000148998399907459	39
0.999533526373701	0.000466473626299503	71
0.998614906155102	0.00138509384489807	47
0.998746038833607	0.00125396116639303	28
0.999885784581392	0.000114215418608119	39
0.99905156579647	0.000948434203529724	51
0.9998964449864	0.000103555013600472	35
0.999333294564017	0.000666705435983184	41
0.999988108552686	1.18914473136954e-05	36
0.999935712702492	6.42872975082781e-05	46
0.999878846195602	0.000121153804397557	38
0.999013646530005	0.000986353469995331	37
0.99973510462434	0.000264895375660371	51
0.996617432873756	0.00338256712624371	36
0.999666874535808	0.000333125464192009	37
0.996448090755122	0.00355190924487826	32
0.996745716643102	0.00325428335689801	51
0.996588144560158	0.00341185543984207	34
0.999548562674788	0.000451437325211805	58
0.999227434471724	0.000772565528275768	36
0.997366711449691	0.00263328855030882	43
0.998998229887453	0.00100177011254697	37
0.999944209490962	5.57905090382599e-05	32
0.998650751174087	0.00134924882591311	34
0.999871212079048	0.000128787920951814	32
0.996804191813244	0.0031958081867558	41
0.999814232275861	0.000185767724139382	43
0.999912246676974	8.77533230256256e-05	33
0.996049311731332	0.00395068826866848	31
0.995596820722552	0.00440317927744809	40
0.998728730682871	0.00127126931712934	34
0.999532070618114	0.000467929381886124	40
0.999124416707029	0.00087558329297128	35
0.999601891288155	0.000398108711844599	36
0.999420931441167	0.000579068558833302	35
0.999484243746048	0.000515756253952199	42
0.99998062458675	1.93754132500459e-05	24
0.99909420548189	0.000905794518109934	34
0.998178446278903	0.00182155372109739	47
0.999936436455387	6.35635446130262e-05	30
0.999019310354802	0.000980689645198235	41
0.999821732581921	0.000178267418079387	36
0.99669774879559	0.00330225120440969	39
0.998889702560039	0.00111029743996118	31
0.999516097012043	0.000483902987957014	37
0.999670405253249	0.000329594746750601	48
0.99891326419441	0.00108673580558986	34
0.999840357067336	0.0001596429326639	35
0.999833327066498	0.000166672933502314	29
0.99933334993573	0.000666650064270455	41
0.992397660589033	0.00760233941096717	33
0.999915514242493	8.44857575066173e-05	39
0.999798178451538	0.000201821548461834	32
0.999467873072738	0.000532126927261583	30
0.998623953093698	0.00137604690630178	28
0.996768702842346	0.00323129715765417	30
0.998925582047522	0.00107441795247808	25
0.997426684406565	0.00257331559343511	30
0.999500464869792	0.000499535130207774	31
0.999173377457112	0.000826622542888323	38
0.998345723124797	0.0016542768752031	32
0.994939006281161	0.00506099371883889	29
0.99967687163784	0.000323128362160224	33
0.999938903564033	6.10964359666886e-05	27
0.997172894469128	0.00282710553087206	32
0.999922685401529	7.73145984705938e-05	34
0.998849606057244	0.00115039394275619	35
0.999955483910874	4.45160891257243e-05	32
0.996793476367757	0.00320652363224313	37
0.999921555608512	7.84443914875796e-05	23
0.997698557206398	0.00230144279360197	30
0.999862193422685	0.00013780657731468	44
0.998689452919659	0.00131054708034132	25
0.999821314506539	0.000178685493461129	39
0.999731024361941	0.000268975638059533	35
0.999986305080832	1.3694919168113e-05	30
0.999657975767646	0.000342024232353802	26
0.995903056729123	0.00409694327087668	25
0.978600575884256	0.0213994241157437	44
0.999431968327445	0.000568031672554999	30
0.999971946758992	2.80532410078649e-05	32
0.998536701470887	0.0014632985291129	28
0.999176287825195	0.000823712174804818	35
0.999856392263487	0.000143607736513046	31
0.999422602929796	0.000577397070204074	28
0.99997746430086	2.25356991395462e-05	31
0.999653385906276	0.000346614093724011	26
0.997589091192883	0.002410908807117	26
0.995983198812668	0.00401680118733164	28
0.999453734983706	0.00054626501629426	24
0.999950794578369	4.92054216307787e-05	27
0.999456594957676	0.000543405042324182	30
0.994837050081559	0.0051629499184412	35
0.999562340302978	0.000437659697022058	31
0.999817585227896	0.000182414772104553	27
0.999755450999225	0.000244549000774617	26
0.999741634320235	0.000258365679765036	24
0.993708491316202	0.00629150868379764	32
0.999315539489954	0.000684460510046202	27
0.999478483807156	0.000521516192843578	34
0.99703688429633	0.00296311570366977	31
0.998561056313125	0.00143894368687536	27
0.999619961855261	0.000380038144738705	22
0.999497145112802	0.000502854887197785	29
0.99806546716209	0.00193453283790991	40
0.999568477335133	0.000431522664867249	24
0.999984414185161	1.55858148392191e-05	38
0.999993479194523	6.52080547722715e-06	32
0.999992540869304	7.45913069639578e-06	29
0.999690486228839	0.000309513771161201	26
0.995716400296148	0.00428359970385206	24
0.999439490558759	0.000560509441240882	38
0.999308757718409	0.000691242281590934	25
0.99442162934878	0.00557837065121959	30
0.999884233440614	0.000115766559385543	28
0.998526456164436	0.00147354383556358	33
0.999921795241399	7.82047586012658e-05	26
0.998122834087228	0.00187716591277189	27
0.997272787855748	0.00272721214425218	28
0.99992645183289	7.35481671096684e-05	20
0.997971459110877	0.00202854088912336	24
0.999452190080396	0.000547809919603695	24
0.998724573895208	0.00127542610479174	22
0.995314501622856	0.00468549837714433	25
0.998909771796838	0.00109022820316175	28
0.995792900679144	0.00420709932085591	34
0.998415632449954	0.00158436755004599	29
0.994329117217975	0.00567088278202486	26
0.999330837078579	0.000669162921421294	23
0.999234885084865	0.000765114915134664	22
0.99927381998292	0.000726180017080469	30
0.99657335321344	0.00342664678656058	25
0.998120757914805	0.00187924208519506	31
0.998859531041505	0.00114046895849503	21
0.324795453306527	0.675204546693473	27
0.614317481735751	0.385682518264249	19
0.13570950045404	0.86429049954596	28
0.615634677567231	0.384365322432769	23
0.0527290938632478	0.947270906136752	20
0.0576573202455131	0.942342679754487	37
0.656582378251076	0.343417621748924	31
0.102342581184326	0.897657418815674	26
0.279159293349572	0.720840706650428	25
0.173778874154678	0.826221125845322	22
0.406230466749175	0.593769533250825	36
0.400147821296332	0.599852178703668	25
0.257924093451707	0.742075906548293	27
0.132779082834773	0.867220917165227	28
0.261945181346416	0.738054818653584	30
0.49717064128782	0.50282935871218	25
0.212003461785159	0.787996538214841	25
0.0872061711254277	0.912793828874572	26
0.816092387572876	0.183907612427124	18
0.083849062084061	0.916150937915939	14
0.524326264102067	0.475673735897933	19
0.552002107421955	0.447997892578045	21
0.530353949622692	0.469646050377308	22
0.21172791547925	0.78827208452075	26
0.0253650678743933	0.974634932125607	28
0.0704333015501859	0.929566698449814	29
0.551233361897625	0.448766638102375	25
0.584593857712666	0.415406142287334	23
0.0824823673459677	0.917517632654032	21
0.118500176312293	0.881499823687707	22
0.501469324627045	0.498530675372955	21
0.50340196543836	0.49659803456164	30
0.315489496672859	0.684510503327141	20
0.898526426362185	0.101473573637815	23
0.646910034569257	0.353089965430743	19
0.818316228541626	0.181683771458374	26
0.680133103830506	0.319866896169494	22
0.817479274510164	0.182520725489836	18
0.975543973924388	0.0244560260756117	32
0.890666321748032	0.109333678251968	25
0.485342358298484	0.514657641701516	26
0.986591800897236	0.0134081991027638	24
0.925976961337591	0.0740230386624087	22
0.369774491412731	0.630225508587269	35
0.946910573095311	0.053089426904689	25
0.928610476666069	0.071389523333931	26
0.598845167816055	0.401154832183945	25
0.946049685101428	0.0539503148985723	23
0.997559361594349	0.00244063840565137	23
0.901918753882438	0.0980812461175618	24
0.766687632081979	0.233312367918021	24
0.288325018213647	0.711674981786353	16
0.324774209479482	0.675225790520517	14
0.753452364353986	0.246547635646014	15
0.203678346478046	0.796321653521954	19
0.269614007898545	0.730385992101455	20
0.903438911400323	0.0965610885996773	25
0.629586656785579	0.370413343214421	26
0.980652295591295	0.0193477044087052	29
0.924791026376474	0.0752089736235258	24
0.71379214484847	0.28620785515153	21
0.482706677631179	0.517293322368821	21
0.915255486447753	0.0847445135522468	20
0.288820415922685	0.711179584077315	20
0.91471051051617	0.0852894894838299	22
0.887839941897017	0.112160058102983	20
0.0351983749538793	0.964801625046121	20
0.017266727547156	0.982733272452844	19
0.158701938374874	0.841298061625126	21
0.0948250279000322	0.905174972099968	18
0.0250124738089864	0.974987526191014	18
0.495721083148042	0.504278916851958	28
0.219693191352228	0.780306808647772	23
0.281691614435917	0.718308385564083	21
0.134464062660205	0.865535937339795	21
0.0591458458080801	0.94085415419192	22
0.139535504058517	0.860464495941483	27
0.152397210692168	0.847602789307832	19
0.0121284457883265	0.987871554211674	25
0.257997926852967	0.742002073147033	23
0.0147862816833797	0.98521371831662	22
0.157242356687994	0.842757643312006	20
0.350382609252575	0.649617390747425	23
0.369179698630241	0.63082030136976	24
0.191630866950149	0.808369133049851	16
0.034173056160974	0.965826943839026	11
0.0353198738033639	0.964680126196636	13
0.077199204381965	0.922800795618035	19
0.201314507340356	0.798685492659644	19
0.0638804420694752	0.936119557930525	23
0.0166224458472578	0.983377554152742	20
0.775885828134079	0.224114171865921	28
0.0378686516008929	0.962131348399107	23
0.401616570637982	0.598383429362018	18
0.0807809522160556	0.919219047783944	20
0.0426174857727183	0.957382514227282	20
0.0108156992389848	0.989184300761015	18
0.200889178070515	0.799110821929485	21
0.3376662019838	0.6623337980162	19
0.0649636870852485	0.935036312914752	19
0.00940925506371384	0.990590744936286	19
0.0652173094669111	0.934782690533089	20
0.181610520239209	0.818389479760791	16
0.010568138560445	0.989431861439555	16
0.307972655509313	0.692027344490687	26
0.0685304372563238	0.931469562743676	21
0.0156643644300283	0.984335635569972	14
0.0203090177364227	0.979690982263577	17
0.38836501671813	0.61163498328187	20
0.00511972283801963	0.99488027716198	25
0.0185388061117754	0.981461193888225	17
0.802647482510163	0.197352517489837	24
0.0125993818535151	0.987400618146485	22
0.199195239628703	0.800804760371297	16
0.00785223276228571	0.992147767237714	19
0.283778049026986	0.716221950973014	22
0.0473421655829443	0.952657834417056	22
0.48644419647465	0.51355580352535	14
0.0266899217463338	0.973310078253666	11
0.0209017635582399	0.97909823644176	12
0.0158060038735306	0.98419399612647	19
0.267970803911979	0.732029196088021	19
0.0718778951448052	0.928122104855195	21
0.747159910442071	0.252840089557929	20
0.176787251222736	0.823212748777264	23
0.0568206581622063	0.943179341837794	22
0.0438281281664518	0.956171871833548	18
0.0658649620228243	0.934135037977176	20
0.238506949031637	0.761493050968363	18
0.0391992413293786	0.960800758670621	18
0.00777439842440862	0.992225601575591	19
0.0114446232157969	0.988555376784203	15
0.000244051294672137	0.999755948705328	19
5.78599750248062e-05	0.999942140024975	18
2.5753234898425e-05	0.999974246765102	16
0.00258622578915858	0.997413774210841	16
0.000386859032316773	0.999613140967683	13
0.000214286496339035	0.999785713503661	18
4.7719222528935e-05	0.999952280777471	19
0.000157331443779702	0.99984266855622	10
2.9473922432608e-05	0.999970526077568	14
2.06567520594885e-05	0.99997934324794	19
8.84002028468905e-05	0.999911599797153	22
7.84509718433455e-05	0.999921549028157	17
4.46343960664736e-05	0.999955365603933	23
4.8408795536108e-05	0.999951591204464	22
6.35210343708111e-05	0.999936478965629	11
0.000530566461635344	0.999469433538365	19
3.04978560157478e-05	0.999969502143984	21
0.000721553351040719	0.999278446648959	21
7.96038826239245e-05	0.999920396117376	12
0.000130702410446614	0.999869297589553	10
6.26534517407575e-05	0.999937346548259	11
0.000428434146472267	0.999571565853528	17
0.000301028514634124	0.999698971485366	15
0.0026659775629502	0.99733402243705	18
3.25514632576031e-05	0.999967448536742	14
0.0076862963575657	0.992313703642434	21
0.00103336179515681	0.998966638204843	22
5.35533296802026e-06	0.999994644667032	18
3.07566421355806e-05	0.999969243357864	19
9.96103074685803e-06	0.999990038969253	16
3.72222375511136e-05	0.999962777762449	14
0.000635110978753889	0.999364889021246	14
2.93015211642016e-05	0.999970698478836	14
3.27277768216407e-05	0.999967272223178	19
1.064065257168e-05	0.999989359347428	15
8.17754283175887e-05	0.999918224571682	11
0.000583205493758227	0.999416794506242	15
6.28681317306877e-05	0.999937131868269	12
2.40406402483722e-05	0.999975959359752	14
5.13718477479863e-05	0.999948628152252	18
1.6819544855704e-05	0.999983180455144	14
1.52553244221771e-05	0.999984744675578	15
2.61888872318468e-05	0.999973811112768	13
3.66162172266692e-05	0.999963383782773	13
0.000248663425347274	0.999751336574653	20
0.00110494066092844	0.998895059339072	18
0.000101795869990549	0.99989820413001	11
0.00139611429485682	0.998603885705143	17
1.89660592387141e-05	0.999981033940761	21
8.66899855960153e-05	0.999913310014404	11
0.000261018601407319	0.999738981398593	8
9.33074747851039e-05	0.999906692525215	11
0.000563708598478691	0.999436291401521	12
1.29869725044177e-05	0.999987013027496	15
0.000262625370024876	0.999737374629975	15
4.12237870090188e-05	0.999958776212991	13
0.00797978313710465	0.992020216862895	20
7.19283210356514e-05	0.999928071678964	20
5.11224615371406e-05	0.999948877538463	14
0.000192659326743326	0.999807340673257	18
2.25580738319956e-05	0.999977441926168	14
3.76658209551585e-05	0.999962334179045	13
8.71205673812462e-05	0.999912879432619	12
0.000305377224037262	0.999694622775963	8
1.25714726818489e-05	0.999987428527318	15
2.49119787310486e-05	0.999975088021269	14
0.000174716313137668	0.999825283686862	10
8.73824957476737e-05	0.999912617504252	12
0.000487622484590562	0.999512377515409	8
2.11546032331962e-05	0.999978845396767	14
3.27355683756078e-05	0.999967264431624	13
0.000264766259768705	0.999735233740231	16
0.000136736288985635	0.999863263711014	17
0.000229733477813332	0.999770266522187	10
0.000384543687353464	0.999615456312647	14
6.26752557174691e-05	0.999937324744283	19
8.97130485416068e-05	0.999910286951458	11
8.89127743055564e-05	0.999911087225694	11
2.64748291040381e-05	0.999973525170896	14
0.00016527439947619	0.999834725600524	9
2.99899625863849e-05	0.999970010037414	13
0.00026371732327017	0.99973628267673	18
6.37720764990228e-05	0.999936227923501	12
0.000441097492866357	0.999558902507134	16
9.10326972756399e-05	0.999908967302724	12
3.95402145294676e-05	0.99996045978547	13
7.20685516366914e-05	0.999927931448363	13
7.23628159585868e-05	0.999927637184041	14
0.000155909430875022	0.999844090569125	11
0.0013948020250363	0.998605197974964	12
3.37373008975983e-05	0.999966262699102	15
0.000850096941423828	0.999149903058576	15
0.000989905629134692	0.999010094370865	13
0.00141843665288338	0.998581563347117	16
0.000346480809053935	0.999653519190946	11
0.000182492396937092	0.999817507603063	10
9.40474713274345e-06	0.999990595252867	18
0.000292215293024264	0.999707784706976	10
0.00177099321609541	0.998229006783904	12
0.000104611003675964	0.999895388996324	12
9.25234227946524e-05	0.999907476577205	14
5.69792120741678e-05	0.999943020787926	15
4.7775030821796e-05	0.999952224969178	15
0.000363861167591206	0.999636138832409	10
0.000844484805380492	0.99915551519462	16
0.00110082695591323	0.998899173044087	8
0.000209611461843174	0.999790388538157	17
0.000704524683521868	0.999295475316478	8
0.000245218395886404	0.999754781604114	11
0.00253337692066561	0.997466623079334	13
0.000782127872474164	0.999217872127526	10
0.00316772930360745	0.996832270696393	8
0.00163733559575398	0.998362664404246	8
0.0192629924496837	0.980737007550316	12
0.000943741228848419	0.999056258771152	9
0.00216883479636185	0.997831165203638	13
0.00495397957329135	0.995046020426709	13
0.00709453947838508	0.992905460521615	11
0.0127215137808362	0.987278486219164	11
