# Supplementary material for: Value signals guide abstraction during learning
Source: eLife. 2021 Jul 13;10:e68943. doi: 10.7554/eLife.68943 (PMC8331191; doi:10.7554/eLife.68943)
Supplement: Figure 3—source data 5. [file elife-68943-fig3-data5.csv]

confidence	learningspeed	abstraction
7	0.609347442680776	1.5
6.5	0.769753086419753	1.6
7.5	0.613168724279835	1.41666666666667
4.5	0.534979423868313	1.33333333333333
7	0.644824311490978	1.46153846153846
4	0.584362139917695	1.41666666666667
7	0.632275132275132	1.42857142857143
5	0.599326599326599	1.45454545454545
6	0.653371320037987	1.46153846153846
NaN	0.674603174603175	1.5
5	0.520576131687243	1.5
7.5	0.633428300094967	1.46153846153846
7.5	0.661265432098765	1.5
7	0.674897119341564	1.53333333333333
4	0.593542260208927	1.46153846153846
7	0.702160493827161	1.5625
6	0.538720538720539	1.36363636363636
7	0.640329218106996	1.53333333333333
8	0.722222222222222	1.5625
6.5	0.683127572016461	1.5
7.5	0.73015873015873	1.42857142857143
4	0.652263374485597	1.41666666666667
5	0.705603038936372	1.46153846153846
7.5	0.62962962962963	1.46153846153846
6	0.593621399176955	1.33333333333333
6	0.653371320037987	1.38461538461538
8	0.699845679012346	1.5
8	0.686067019400353	1.42857142857143
8	0.644824311490978	1.53846153846154
7	0.662551440329218	1.53333333333333
8	0.733024691358025	1.5625
5	0.616255144032922	1.33333333333333
NaN	0.631687242798354	1.41666666666667
