# Supplementary material for: Value signals guide abstraction during learning
Source: eLife. 2021 Jul 13;10:e68943. doi: 10.7554/eLife.68943 (PMC8331191; doi:10.7554/eLife.68943)
Supplement: Figure 3—source data 6. [file elife-68943-fig3-data6.csv]

LR_m1	LR_m2
0.33388546738505	0.404454664838934
0.233115728871454	0.114908391713142
0.544727443633288	0.447601106132373
0.164706758677108	0.258629978970315
0.589154999410505	0.634837448509621
0.251773359003869	0.645285404658492
0.496896386093107	0.526249368380073
0.17442295527346	0.606749370228433
0.254270464981255	0.705590767667088
0.179638043679507	0.761933710163089
0.602219423373289	0.318841700637882
0.119096101325878	0.0530837748710256
0.758563756050236	0.432823913537298
0.343089542866209	0.0928329132675472
0.246682394749417	0.362018663269057
0.259530849219224	0.154354160292973
0.518947626958063	0.549402270633118
0.113743847257597	0.678563206446502
0.190623082941398	0.0866482997067121
0.254526786739714	0.10305718220054
0.372401936241116	0.148041710626464
0.529354169366902	0.256929877493757
0.54895930785179	0.15498627825281
0.564561716982895	0.585957457499878
0.337003618932387	0.163812787066802
0.328983447030635	0.127517293750385
0.28840424629929	0.208487834439054
0.44088542194097	0.508910344906342
0.701164547951521	0.514911448995815
0.770742280653354	0.583128093756908
0.378688131121137	0.102684489886538
0.642070642725014	0.637843034224941
0.803408934439402	0.766136806912635
0.133962340827737	0.0687953192823651
0.347774843229398	0.185168044118604
0.285878995528186	0.132655263466581
0.182104318431827	0.544865363670281
0.111955029065318	0.0598257671772663
0.279996014522839	0.232447105206966
0.289061036416683	0.17012045859987
0.557642983358037	0.412334003790066
0.212063073593582	0.17312323977566
0.160282473737704	0.0893939075834393
0.161880203437431	0.0893050277402198
0.524768298122671	0.477326188858042
0.176454686632061	0.100420091065873
0.574704570697369	0.252352897201939
0.0918228952386245	0.0490448489326452
0.1365186125134	0.0709036150526682
0.183586891429213	0.104757774741005
0.218266154769571	0.133299661307636
0.724208940989559	0.404260392145561
0.194754934353695	0.124430084177849
0.278035663077607	0.176105869536509
0.179716754368193	0.0888298689573328
0.202818298540961	0.114763619790807
0.547410869913092	0.164597387809849
0.408806504349319	0.241675161644619
0.259726122374149	0.125510085188673
0.273894072894334	0.183094019638106
0.186969934640917	0.0876917507098359
0.107975737180786	0.148906580395489
0.184336884606471	0.0800499653313293
0.35669924009836	0.19804985849401
0.218414910095177	0.143151032982211
0.109966116466963	0.0557582808755075
0.398354045101485	0.222960765928748
0.772702890160473	0.788992995749016
0.279573818076192	0.206748447706872
0.122042593675471	0.0802528522019554
0.288626573329758	0.158436000283542
0.559929362889095	0.243128060145964
0.4044947503429	0.223449872559763
0.199096902111522	0.0819379773553673
0.397647973452109	0.250037132507522
0.267192737726143	0.164725744895514
0.512869365259252	0.243202369518775
0.401939595189065	0.755325619611079
0.306621371121945	0.192524182724717
0.390010620975515	0.182761367171101
0.64720106183486	0.77355343291541
0.403008658818561	0.153964226926651
0.163798370025475	0.0840237023238622
0.312731959321864	0.193038485104147
0.292697340329722	0.147132566533299
0.37281528226454	0.126873743097984
0.218120259471238	0.185444917364778
0.337708464591449	0.158432044164831
0.336662397563158	0.169516979155626
0.169022790886505	0.150866258163735
0.151684721785588	0.0853160491509615
0.258085395108569	0.137992876183687
0.503685864221014	0.257722782775456
0.341436592600995	0.167958543881004
0.183130916653389	0.0848770071969721
0.27192172541632	0.135689945003626
0.660446464861901	0.172595763985326
0.237928546090898	0.163626130370015
0.200374880961995	0.0903327495650643
0.204582023729738	0.136658191575116
0.645499135645028	0.237549524147273
0.197565860788861	0.669356039207054
0.164315133646913	0.0871530785998808
0.443591040867488	0.124098741024015
0.620413522055271	0.198104312074275
0.328581166376125	0.266187472389992
0.234245437580007	0.102616427365196
0.246837658869979	0.294567961060511
0.177148642220824	0.126298113058459
0.28563294661394	0.327940189089252
0.24700203892662	0.109983663496527
0.160045908591231	0.0871942858754712
0.324904081814476	0.198391772587839
0.183203442920987	0.121517164103217
0.86612265855032	0.732476219095638
0.328713883631463	0.10968158193673
0.32294457217682	0.160097164582958
0.334587697318555	0.144500318402185
0.504134105662048	0.501519153170741
0.757950074325725	0.430594081419439
0.391173325916827	0.231967630310046
0.669413084129922	0.230845310643711
0.213380749322958	0.124976148475585
0.162907714923337	0.0967784614051964
0.778794075711818	0.821135471335822
0.841785507034849	0.694685025971998
0.195070650685302	0.118920915359245
0.448378204654768	0.169153753781818
0.20062002368982	0.114820569243465
0.298079512807466	0.17263447248793
0.574040687302808	0.446365982275908
0.394672361452717	0.157548764851984
0.512713873515071	0.22425803599985
0.332022736237311	0.177762735374703
0.249049347849343	0.19256811260306
0.15404585921717	0.106131824431225
0.413413697458437	0.184090660640491
0.244169732668299	0.118898480310958
0.81093354547853	0.1391040058965
0.403156720991003	0.648242104307053
0.77745898109256	0.804126346286987
0.427973822566182	0.282359819826571
0.77780551145841	0.389333362576953
0.636374312143046	0.374691366360178
0.316402428074395	0.161581739116883
0.220535466670457	0.137317010847497
0.206694574205927	0.137105372485791
0.482700543891278	0.209945730187867
0.626902302271104	0.178276476648043
0.421330327903768	0.605012327759603
0.317800809944263	0.200753952781421
0.269698035187464	0.232012587655196
0.788767564290066	0.408679884213687
0.465957594647661	0.249749905438492
0.647672397864451	0.415180478608312
0.230519981056178	0.12650381404619
0.445564159493782	0.320408364094577
0.259193010965599	0.16285374199037
0.418610642461498	0.25007278747638
0.435427491714459	0.265383609232341
0.476438169293107	0.216008310535767
0.32219922450373	0.18851069228845
0.622220511074405	0.449649660664946
0.442537769757823	0.170928565756954
0.328402366334623	0.232504387546328
0.822166429002321	0.397906823931076
0.368680208615013	0.22785009032212
0.380688381832375	0.220719054370036
0.248189444606037	0.132319276661726
0.378848189025703	0.261389181285906
0.2387779304436	0.138368350176807
0.416794881967481	0.149678954659408
0.650541574874103	0.191914510891088
0.429994419038013	0.241505144479212
0.270648597340362	0.159939656773371
0.194824074199163	0.109763306795675
0.288627067731643	0.154696561952732
0.468115816336882	0.285080775239068
0.336597659208298	0.338429464984416
0.593821055430078	0.394398378037482
0.411664471364043	0.259742008289835
0.32908803468702	0.213191812712113
0.249770604581887	0.260033235422907
0.654014135941292	0.265437238116843
0.82694821545638	0.795936350359128
0.802096241240437	0.461787313055898
0.27419697773174	0.203406953210233
0.633601249223952	0.464685332094314
0.474271343384702	0.152591936603744
0.682808987479029	0.155226801687291
0.362169833922788	0.69123983594314
0.335736201339786	0.19324622068581
0.801114376984635	0.399248579565901
0.318014889247336	0.169906428273191
0.206491762007982	0.173962165122504
0.392844108227926	0.18962197971327
0.36049774645986	0.328925102328406
0.421868422199025	0.463362203352248
0.214331872545785	0.112716057717095
0.645141975846915	0.594723912261781
0.719515597587136	0.427122219922793
0.640496370848931	0.202558777955013
0.427702563151353	0.350061541294696
0.76009546354643	0.195974145658687
0.30504522998065	0.137939181743531
0.602126339138076	0.421084324411495
0.427973819837639	0.216806801476007
0.330765820770246	0.20874389693646
0.183247062452682	0.122588697595232
0.461787287605981	0.20758836323664
0.34093725830509	0.25228929574482
0.76068475512748	0.335624685478012
0.486867306502861	0.284301612515049
0.476122919770045	0.276976717858809
0.758927853615421	0.589981668791184
0.400165524705468	0.210429765733269
0.474474547724491	0.256686853760801
0.65369082573285	0.641946481582409
0.65071523131158	0.274180315127874
0.465067940566997	0.234905774365712
0.787848530601117	0.511995655383455
0.36408972949292	0.28511503387943
0.52888217065691	0.288572311512135
0.256787322287388	0.21462360920898
0.288627091989215	0.252079038120091
0.650795453018402	0.454772899690689
0.608371603748877	0.216777143499105
0.351233334002194	0.404447727089206
0.469918414664063	0.214752765433571
0.32855786924123	0.262563980512172
0.82118448737798	0.494012708265642
0.431897066836544	0.733666288187476
0.651442440532409	0.365649824779086
0.595826955504783	0.739317623085466
0.491086836156285	0.303009638528082
0.652446015764437	0.628597957009213
0.692182784385068	0.310299413808942
0.305061272509407	0.205560528782864
0.299382398705996	0.2605513411686
0.453521995467808	0.202611535509375
0.452679208871121	0.655836536957231
0.32724989605396	0.35703439918062
0.501547483619717	0.188585045617237
0.373684763212665	0.20304288949051
0.790382444064474	0.558002197449033
0.359272088778911	0.388006811732201
0.654421359268352	0.322711667378943
0.449627398827117	0.207605616503959
0.278653881175362	0.173077449689749
0.467042534987328	0.357026302705019
0.5232639981511	0.427415176512497
0.650668483638231	0.367890981549838
0.646163580360097	0.635124012362958
0.479903707875895	0.365443205065271
0.333972851351214	0.1689660836912
0.846036941461493	0.739274723959658
0.514023847661076	0.283110401381128
0.323453313824834	0.212658149620724
0.437432935085241	0.285806259562195
0.642293420742753	0.632809532092865
0.645414791864756	0.267857633570052
0.648840721172929	0.623640743613904
0.376299104864612	0.251213342130414
0.370729044825823	0.213253089504874
0.495682348441783	0.269388112298308
0.645643193971531	0.633713188118112
0.652384810184222	0.359677246865633
0.378790516880709	0.270502160521079
0.679170690029667	0.260377986647827
0.287176130707233	0.313573108538741
0.441259674732185	0.248180084156786
0.656441897138102	0.265289696819115
0.326793085535944	0.196915645168234
0.329702233267692	0.20034228478712
0.451435503520907	0.185875542654425
0.432982703058215	0.321185389249946
0.571687991092382	0.245420282526352
0.355625529272376	0.222411598139234
0.843773792527029	0.800319153615288
0.347597025882143	0.281242875249779
0.661283270834968	0.493176399071184
0.261139425023495	0.146181508805481
0.64464556393696	0.631729502033388
0.65238668803655	0.638507205646901
0.639880748762887	0.634436933808042
0.500357627252012	0.332604983082606
0.651684192044809	0.612866809729925
0.359272092537419	0.271755004619051
0.650528697811494	0.633895584043078
0.44316429114487	0.709580531956891
0.431897048197967	0.253590166342871
0.639554693492193	0.742646848692492
0.716700610127815	0.586870848325442
0.422725458134797	0.26478953246965
0.481233288754924	0.380657368739177
0.653346366147263	0.560021146230507
0.783404491303139	0.370483463599143
0.655109495278252	0.373804883550751
0.651111796724523	0.634852161447656
0.654192067919449	0.367496657521192
0.330336469188058	0.408141022560062
0.650668436094073	0.639081975904246
0.282474039180866	0.228528576892119
0.649112097033572	0.359445699378522
0.561906431188089	0.418694825798115
0.797347855879731	0.753703192917065
0.486976174357361	0.201817613558102
0.437398160511046	0.338815739249232
0.363550990847083	0.34677114119277
0.442750870288495	0.211529807173522
0.338058117208817	0.290282749515201
0.537486500469707	0.312472281231236
0.438748949449886	0.373804926985271
0.465067893717018	0.29667863397218
0.32307767902902	0.200342297952807
0.641891079418633	0.392531559409797
0.633939478124743	0.645981864619117
0.64257925159687	0.634816374484205
0.65020361243145	0.625110519796631
0.645989146536326	0.27577362318442
0.644632343711097	0.360477541419025
0.489426289968445	0.194775552107918
0.361743636247952	0.190400225355417
0.339515464060688	0.205350390490389
0.356122957872198	0.233189838930311
0.654192102021611	0.368272602713219
0.810478567350395	0.499065233718362
0.46597424924855	0.789023332277197
0.446247796069279	0.375408032343215
0.637571523189794	0.638277769623826
0.780302366441238	0.344663234609465
0.64034771314535	0.372590845955549
0.640960834044869	0.638263100218354
0.624701447134734	0.525017870311527
0.646547902575614	0.3795409035643
0.438748994045243	0.285208216653794
0.507694250526397	0.612866807350972
0.644811829011177	0.627743317592815
0.652072533696832	0.640960798565649
0.446247714272964	0.371598978482515
0.368245792128423	0.471792986329117
0.647506138478165	0.34905721577332
0.65097061068988	0.763278347203508
0.36824586422801	0.286243963026927
0.642579277049285	0.635263481708665
0.650203639337397	0.314020093520557
0.359295368065994	0.264651296667281
0.653167919695199	0.238633391923159
0.648141052256936	0.635263542637104
0.627975199143914	0.624121385988692
0.642579278435961	0.634816346456036
0.47732612505304	0.346771180716445
0.345116836200136	0.289383711113791
0.605228993614344	0.407315510383907
0.646547861409503	0.641218928604038
0.459676416619478	0.240769856846459
0.394943744461314	0.200342313722385
0.652110264017722	0.636386117895236
0.651442397214422	0.37284121707986
0.655034417543803	0.638923126332974
0.638507210956023	0.641388771008325
0.652072551245201	0.720062763337734
0.64654787082837	0.632455453562485
0.463051312240848	0.373804909263942
0.656422679249352	0.640377393660362
0.633939480053545	0.63757158261247
0.624701514208897	0.324106737366641
0.630514322484388	0.643882472033432
0.64598186967679	0.632455436856629
0.446247775230908	0.384290791354121
0.65369083310216	0.641946469038405
0.650304715726541	0.630766314543821
0.650046213356219	0.642937123705674
0.647550697346266	0.642169552616972
0.458925952508919	0.245448810350358
0.625742865278771	0.475877471063656
0.65004626630553	0.646547888673098
0.615149761248587	0.520383807538881
0.64944481685883	0.352032734461948
0.650046251004612	0.624908647932264
0.621427468728202	0.644811837959167
0.650046196960471	0.637265408135886
0.642579233452507	0.390640950104739
0.645981861741324	0.639637857703329
0.653798784879971	0.402166691475381
0.652072583374396	0.633202700690624
0.44673890319074	0.215232013887123
0.449923177164277	0.572587802942683
0.641891077817459	0.63245542873156
0.465974282858202	0.273796354580927
0.652072561771049	0.640960795132984
0.647550742368406	0.64348900104286
0.652072603219451	0.643882485169825
0.640064843185339	0.6339394970347
0.649076994984311	0.629299878950699
0.649076980419288	0.631150876538985
0.644811849414869	0.639880727101084
0.638521700908131	0.621335690163481
0.647776757768681	0.64481180997183
0.64814103812343	0.641946463037557
0.64257923128918	0.642169525770474
0.648580527157317	0.400921264473792
0.648580538534172	0.389081894862025
0.65004623968949	0.648141064292859
0.656422729878586	0.384855479944962
0.651111819143816	0.369861227177904
0.644811848995798	0.63850718981741
0.64481185273495	0.637571588603941
0.652072551440105	0.641785622030054
0.644811860565244	0.627188323523727
0.650046207875414	0.64216948533852
0.481779983871608	0.277058880968235
0.642579253887004	0.64295273157671
0.458598628101485	0.78933851019231
0.638521707771257	0.633188781451832
0.648141046474942	0.634436978402807
0.653690777179817	0.642169518185234
0.65030477979617	0.641218948388087
0.63988077534308	0.62222276784517
0.642579165046648	0.390641014459277
0.654792568775361	0.639807629336777
0.656422743466399	0.698498920701665
0.653690808286323	0.438078180700654
0.652446014177214	0.260879116096067
0.627743333816668	0.62490867642043
0.633939468865076	0.637571570626171
0.64761969964839	0.635552312902838
0.640815722497018	0.624121386972963
0.648141000587146	0.399239728155689
0.655587364589522	0.64464559542909
0.637571576925046	0.632580483596773
0.649792311852611	0.639253386804492
0.655034415583553	0.639807631075981
0.647776769675666	0.639880771361659
0.642937105209273	0.403241294093776
0.640064807683333	0.644811842049916
0.50766004532147	0.39113166706918
0.647776769514799	0.641565847876998
0.652386700637692	0.646547851836555
0.642579222070534	0.438078199386211
0.642579243049626	0.624908670996233
0.636356178262436	0.633939508423703
0.636356154897478	0.627975211158753
0.422641439487036	0.385636275527974
0.63635618702256	0.639880732594876
0.652072570253849	0.632455450128939
0.645981820111887	0.642764835210448
0.647550702843604	0.634816378787044
0.653690823341398	0.645981812468465
