# Supplementary material for: Value signals guide abstraction during learning
Source: eLife. 2021 Jul 13;10:e68943. doi: 10.7554/eLife.68943 (PMC8331191; doi:10.7554/eLife.68943)
Supplement: Figure 3—source data 7. [file elife-68943-fig3-data7.csv]

St_m1	St_m2
0.0760288231520603	0.0632824693116544
4.58165410912924	3.0766717046043
0.410857988647059	0.353186516576268
1.56085768477403	0.937060587607175
0.16099291335065	0.188376248728408
1.00711695179939	0.597598416734307
0.0933384193240811	0.103569905243621
0.817880966439084	0.411243366716504
1.1074376064496	0.772306351732227
1.32153554820826	0.658144068888076
1.17807560311672	1.30777191969111
2.98045650121066	2.84543283109028
0.996356132367215	0.99485158463971
1.4873988731794	2.14182873231307
0.453131876213631	0.377727221066031
0.569901579241694	0.541335659939964
0.196884149823423	0.184181620429217
2.23352315062936	0.772156085349386
1.52399600008099	1.61809462415541
1.07917030227712	1.14118120475929
1.0099308332359	1.03236312180975
0.432410194457618	0.481590366460528
2.77516250814006	3.25326223186829
0.313606632036041	0.303332656950966
0.402836898968567	0.420023751804404
2.40299783900375	2.69677300334368
2.33103657100052	1.80762685357708
2.31628938504246	1.55633155016222
1.14268681991855	1.02207775574539
0.578850694936345	0.587313108938514
2.6798253479851	4.03717618207929
0.30431981329931	0.336996920365262
0.783690907804814	0.800824768278346
2.63032624263049	2.38682148904091
2.48141330452206	2.37177558088785
2.80008626750578	2.88801435276616
0.335551257708125	0.174252357592015
0.894419551336435	0.708500542962989
2.41675907544432	1.91614319366707
2.68956015321225	2.63065469312553
1.33065982558511	1.26582520924442
5.55342109262372	3.33246676212369
5.26313838571115	3.80478041834588
3.10440626128995	2.92217564223608
1.68829959910012	1.46151718392629
1.79826154523148	1.53840656009768
1.36693050089259	1.52806698786754
3.67779705175031	3.07476529143764
2.87859111055735	3.68032961909004
1.82698217472063	1.73258194508675
1.40235205723298	1.03880382658893
1.561435850497	1.55061592913982
3.9566943106977	2.71250277336821
1.53187182971349	1.24705667798094
2.12037322789363	1.71486334814482
2.35791110629136	2.06495409617417
1.3107429319321	1.71413464363318
2.44938130342064	1.94602612195357
2.84487716891166	2.45515996286854
2.22252261635153	1.75294485939927
3.09606299826178	3.09495962773508
3.05569209151335	1.08614803879356
2.81755739367518	3.01849752295668
3.64914505767694	3.12069210864587
4.22531472684549	2.75640107000273
2.10363638207319	2.07072684796706
2.18179198664842	2.15791069324504
3.17296798331282	3.17691667293509
4.11118174827807	2.82648960153709
1.9848477594331	1.48305121187182
3.80407088926058	2.57852234373694
2.14139646176345	2.21514591874074
5.9198105814202	3.72594726203992
3.49736427264714	3.34143504091012
4.3374430297582	3.78853778784117
3.06324024561254	2.51938368809909
2.24896439638289	2.19736243472467
2.10808985791405	1.47940430963489
3.78157470854199	3.27531996801624
1.98553529149194	2.42943464052134
1.1658530443971	0.956447974069746
2.30660667424821	3.33766583239582
2.37616475003069	2.21169137377335
1.35675619661007	0.956725263322759
0.696467572857671	0.724727122087036
2.01929630012015	2.61019848161501
3.83283316099769	1.45253056176911
2.24113442349295	2.33087488628296
3.56597643842549	2.98679119580625
2.48883156314922	1.71306150571563
2.92285149329023	2.13086286848386
5.64065830959381	4.21172703497196
2.49831105001259	3.58421052632228
1.65030405655726	1.83947402870908
2.82508121441749	3.37865376836592
2.63141298985335	2.56824740467219
1.66515608730727	2.14804481776315
3.72168978962755	2.92097624491073
3.2457296366819	3.64049150275625
3.26263226864376	2.43594407979323
7.41410964265987	3.19708582322641
3.193724461164	1.05324193670796
1.47912053668645	1.45064586489987
3.60659596607327	4.43818962816203
1.71786019741653	2.01003729746749
3.8239442624458	2.58993662179779
2.61589041492245	3.59554135798356
4.28146646058362	2.54064647005663
3.53036473227289	2.54022587030943
3.3968147649794	2.33366341348707
2.93030625713223	3.57167227391446
4.90699797852796	4.05073992136211
5.11911447632036	3.75225906559029
1.01075911329663	0.594751851194824
1.38459273497148	1.18077411239934
3.03741312724921	3.35324228212571
4.0548731917128	3.50820828905337
3.79550651941911	4.50162590191612
2.52931820593618	1.93320367950405
2.00117493980169	2.15776528564313
2.9024132674704	2.48234472640615
1.43322940149604	1.7016942035798
4.29556148592282	3.71029823403227
3.18014589807681	2.69980513624666
2.08814871016145	1.79401083755507
1.81685379924809	1.76467860441812
4.40344952536776	3.82830397100205
5.11558636648583	4.35666163107992
3.41907240410781	3.70773182418019
4.41085218394437	3.25771084794144
1.86746201960444	1.45202221007009
3.98116083061253	3.54012015002656
1.51615615995159	1.63437122504338
4.35511500767746	2.21084806529779
4.12028646327039	3.725664732979
6.35449830104521	4.45247554539931
2.45310562955193	2.84688288270965
4.51146992449371	4.46387784821946
2.14908548641807	3.65169872689579
5.5611788556545	2.22165304804916
3.04953649166924	2.3259143187704
2.74356540766976	2.97326614493995
1.13182400674163	1.20454230530474
2.76232820288206	2.83678958546035
5.49947491486328	3.86477033974324
3.14882631905598	2.51245637161647
4.84678075659686	4.01290437268412
2.8119486317116	2.36615875070996
2.06481670361045	2.75171982879126
5.49373359663982	2.32073806882577
4.93492462719274	4.90666724273757
4.58587968647352	4.02933362608216
1.46403854514089	1.39531731757885
4.72338354073285	5.41759133093773
7.57505734452534	4.16665095865783
4.99726753383834	4.64674737228607
1.84897401724691	1.75873844149117
5.337676471528	4.72425999011498
5.16050516286652	4.77845010307333
5.07188107784064	4.62968749443715
4.72535809259086	4.59404615479812
2.05339851192415	2.17058459857208
1.99962365387179	1.45376965528353
2.6050860963777	3.04381823335494
2.33249715740553	1.93071826021779
2.26302877741136	2.59250085572708
4.16820871070523	3.03316266784914
3.42463705384022	2.81000581026649
2.57244283026618	2.38174098820685
4.23881766054484	2.78116839228425
6.24732200003583	4.17770102427678
5.58986637156633	4.56024249187145
7.78924897695614	4.82440493542984
5.05614481182628	5.59197533305011
2.99591089532606	3.79747947902035
4.22364389074039	3.59638575182304
4.30888800481616	4.03915236325156
1.05021976570099	0.90890673933431
4.96229187496343	2.33545171746967
2.00779977819247	1.7991326573861
5.13101447945335	3.49651532068677
2.36978938609515	1.89380349204257
3.84039640504413	2.78347943983065
7.3289454606832	3.13022780051266
2.79157530183182	2.98459710153421
2.89367659361477	2.45122521084387
4.03004035297679	3.01473337872328
1.06132003489578	0.848327710974133
2.53324460229849	3.88776356576751
1.10522266404224	1.63193485489657
3.52572682324172	2.07580856196107
2.49985180627746	3.11393658458665
2.82097028402537	2.61539850183215
4.28992137227733	4.39756306234033
2.46272195984594	1.14233439533685
2.21095329767999	2.79670218315812
2.42438699076607	1.63610046711909
4.51997743033727	3.58064009186281
4.09405314004962	3.79907750952794
7.04291377921172	3.08344500974844
2.52532209868091	2.5848234598313
1.24901910416223	1.16732150730967
2.00764551564001	2.37689366266507
1.67125834675351	2.69107984756344
5.50374715172801	4.94225001540704
2.03624421874677	2.10309847697739
2.74356542638636	2.78660600458807
3.44330938380315	3.20590286102269
2.85914166936915	2.06366981365273
4.86390905782272	4.76966698880137
4.827000178736	3.64536488438305
3.18624910937918	3.74848005450862
3.4226174845819	3.14589674932708
3.13803785391678	2.81670620305461
2.99833278047172	2.64365821698108
2.07653246497448	2.75371715938814
4.03370687715704	2.44428823892387
6.60096460520983	6.77491996545975
7.10656847866033	4.6465441461443
4.50223212783086	4.00310268797794
2.74651142606421	2.00208920409545
2.98929607516127	2.7055793446284
2.36842194009204	3.18450317716478
2.92504029921056	2.58804739686868
4.3088877787206	2.3607891742161
7.52832369168377	3.75922864128198
2.35493865971512	4.15079846348092
3.28317181693743	2.17323572103747
4.49754789232779	4.15367892968981
0.842643591875558	0.52136318295485
2.44278514953966	2.05788054209737
4.73977637742636	2.22215268285147
7.16072936155083	4.90795877240148
2.76751616686878	1.89604657592408
4.41519319774233	4.01105577334977
7.09045227835199	2.93170720180554
2.19293931666496	1.88556463175852
2.94841370624458	2.29301553203952
5.0801485552994	4.03442947016634
4.80890580325789	3.52738869048368
4.65827805453178	2.24026175066455
2.71661726922666	2.11154693434102
2.95498849426576	3.25358666702501
3.11552739743714	2.6244911426509
2.97259028537865	2.72532332695408
4.19764687923295	2.01591872506764
7.55879759736697	2.56751665453668
4.8101967810834	4.62575874820562
2.9440576242994	2.82862114301549
3.67526376565255	4.54048626806357
3.02528183990483	4.02056050747165
6.80429481411019	4.36073285924107
6.97558886466356	7.01875620426878
4.32713812796583	5.03250590845769
4.60123654772399	4.43213229430428
2.91155483683691	2.38316363984463
3.250155310921	2.38860442383129
3.85345231065877	2.67344886278772
4.42426784194605	3.96017010350902
7.20197925070607	7.09931504295138
7.05569288348899	4.83160041108175
7.22623543459178	6.85338109641627
3.95309941841416	2.8624945801395
3.61829909783233	3.18080461440655
4.13137878266514	4.86330535951393
6.94588983479528	6.97600538092507
7.44197473793382	5.15778097705846
2.00217678113964	2.1096478413085
1.69022123660718	3.29537450527775
3.93945190469047	2.03181893290786
2.43969760117759	2.14486312457141
7.5145310827643	5.03307209421582
4.04733738408097	3.98036330557903
2.97141947423533	3.66113150360228
3.32198137949794	4.047938632578
4.33611398292128	3.52416226993973
1.9963811380999	3.49433529644969
4.19821432901129	3.21367941622721
2.63115931012224	2.8728631475127
1.98215689371316	1.57497717454376
2.34911916527037	1.62273644172224
3.69306257862096	2.90081443981358
6.60968267717137	2.73191561593785
6.11689930181156	6.30567670621349
6.16520672124994	6.46904099014063
3.94078533374412	3.47256200588155
7.18123700407802	3.0463693812227
4.19764686948232	3.44823758947423
7.22656972743629	7.05757879513889
5.22384136110583	2.0160940356596
4.73977661525412	5.27646866071042
6.79425745489816	2.628431625973
2.62130053958601	2.33731734086767
4.34193596353271	4.82635315268375
3.82160307744592	4.76506229025628
7.40447164819747	3.31774700397326
2.45859255258852	1.94030377001385
7.2866329258613	4.91583450351744
7.13467558687322	7.01068615720362
7.34723070155425	5.04649833127089
2.10357778965087	1.23896687904618
6.80429494741371	6.8862549382601
3.84209469697658	2.54666438736304
7.24573343785022	5.15400905228745
2.90868624512207	4.03522731484342
2.23964372815515	2.54133785229972
4.14515646815163	3.74206405116499
4.93075185356918	5.52123001437086
2.9283980064969	3.11285340855117
4.80156147503374	3.18362656976267
4.15632464080898	4.06951080944971
3.23860334064878	2.57941525266242
4.14377757926969	4.91583386428345
4.50223233133652	3.19189508550968
3.43474138603814	3.6611311743882
6.63489255685668	3.0139895913137
5.58783880262286	6.49909290566835
6.04907882573653	6.33848246951418
7.20182204501285	6.81211130145267
6.96795192541383	4.66722482586095
7.12511185305611	5.15674978169556
4.14212810567021	2.99368918207905
4.19555349463991	3.92116409816458
2.91356132809078	3.62121192664637
3.50029943411998	4.18638699513595
7.34723090225936	5.05593199135425
2.33019532624781	1.73276304676466
3.89844350584184	2.62604708425832
4.13236576203987	4.92308293887252
6.26804645408264	6.74780669749426
2.56556194631655	3.41633845909269
6.70359573209995	4.76392748716736
6.73162057157009	6.85290808205759
1.3909621066919	1.42078135601976
6.53163162415754	3.93572876173396
4.14377729142066	4.47559721595045
3.92630059973156	3.04636931291012
5.86474349123528	5.88996555099316
6.70769436917659	6.73162041668285
4.13236664315725	4.89760575727608
3.98567390506555	2.82322317817208
6.92014661589532	4.69783869983722
7.43644127521474	2.96791428902608
3.98567325736699	4.08531337747507
6.04907846737019	6.35097461073542
7.20182215134481	3.55810009480365
3.87179990720199	5.0229266333283
7.38699120165446	3.98697823105406
6.41116302492987	6.3509742631536
5.68045309014777	5.98203554616496
6.04907821655869	6.33848239444426
3.65389168303997	3.11285312985885
2.74478045685342	3.82356941372684
2.11888901905513	1.93482249535994
6.53163199265106	6.74080957788705
2.06351948083719	1.9872438864554
3.8241282664191	3.66113093290868
7.0629221939279	6.97746927920293
7.1607289810371	4.9073648675952
6.95809967857048	6.87988615015594
6.30567668967011	6.74787086054977
6.7076937657356	2.38479862417144
6.53163210403992	6.53408861646704
4.23420767529458	4.91583420285388
6.87134252898909	6.82904414356747
5.58783836582199	6.26804573694588
1.39096208158541	2.90289053247067
5.75111637531969	6.57100260324796
6.49909321303167	6.53408890617226
4.13236599023926	4.78334840590599
6.60096431835391	6.77492043024682
6.77730631572288	6.59684275031469
6.27470906531713	6.68142697940725
6.37545674909606	6.64479015846843
1.90741841337334	3.76492981730278
1.28703058552918	1.92197961502391
6.2747085103401	6.5316318729078
0.799982348456967	1.56884292280682
7.2696648370451	5.14296985035108
6.27470884462014	5.99860480129984
3.70305696215952	5.86474362702576
6.2747090898431	6.25787477404823
6.04907904007336	3.67230113179045
6.49909288786678	6.79625045409608
7.03799686755716	4.25145943012871
6.70769351123549	6.42655996256325
1.91950859032517	2.21057276746172
4.42202924506659	3.21161612505768
6.63489248533291	6.53408878743589
3.89844337024283	4.49624277084481
6.70769384358121	6.73162034274808
6.37545681050138	6.70983230276662
6.70769336382995	6.571002377971
4.94958328461299	5.58783835571497
6.867424112418	6.66005156623999
6.86742391989399	6.60721295901088
5.864743524516	6.16520686447509
6.11202140447258	6.07485394033594
5.63960783664587	5.86474388473065
6.41116273539229	6.77492027932049
6.04907898784541	6.64479053766171
6.83516705429274	4.43909585067241
6.83516640960553	4.60951720432106
6.27470912542666	6.41116276729764
6.87134225216984	4.15639315479318
7.13467521851867	4.89020046173139
5.86474371582623	6.30567634398974
5.86474393700524	6.26804581028301
6.70769403758517	6.76802098209632
5.86474350469092	5.87640388018506
6.2747089057282	6.64479043015034
4.02055415495371	4.68289933802091
6.0490784945191	6.52865513721901
3.49136903802196	2.4517414526092
6.1120218929758	6.28746427562732
6.41116298445761	6.46904091527947
6.60096481900619	6.64479043983723
6.77730599284232	6.74080876765838
6.16520648167274	6.09170794527212
6.04907952529607	3.67230068592996
6.93365848149517	6.80304341266091
6.87134247837565	2.52832681587693
6.60096427385909	3.78227360622268
7.09045173985273	4.45359784101745
5.88996573105144	5.99860489453371
5.58783830127256	6.26804589663328
6.92629630771827	6.94619102053599
6.20573480438367	5.98203551285167
6.41116337893749	3.66396322520582
6.48150980286923	6.60968261985937
6.26804571139227	6.53658845587103
6.74269734081564	6.78478879446967
6.95810050585468	6.80304339134863
5.63960772917101	6.16520648321751
6.6814271767085	4.4426573370139
4.94958327612351	5.86474377253714
3.54956959768598	4.61478893612057
5.63960804158741	6.0034556892561
6.11689866948201	6.53163234130771
6.04907906483147	3.78227347710802
6.04907866273978	5.99860487611002
5.31701764369667	5.58783826857661
5.31701794885744	5.68045278166833
2.67562296496184	1.96758891657539
5.31701809174417	6.16520665937188
6.70769377632051	6.53408848237011
6.49909353487846	6.67401142591308
6.37545665714345	6.33848227466815
6.6009646157553	6.49909309326836
