# Supplementary material for: Value signals guide abstraction during learning
Source: eLife. 2021 Jul 13;10:e68943. doi: 10.7554/eLife.68943 (PMC8331191; doi:10.7554/eLife.68943)
Supplement: Figure 3—source data 8. [file elife-68943-fig3-data8.csv]

afb	alb	afh	alh
1	2	0.428571428571429	0.571428571428571
2	2	0.6	0.6
1	2	0.5	0.333333333333333
1	2	0.333333333333333	0.333333333333333
1	2	0.428571428571429	0.5
1	1	0.5	0.333333333333333
1	2	0.428571428571429	0.428571428571429
1	1	0.666666666666667	0.2
1	2	0.142857142857143	0.833333333333333
1	2	0.142857142857143	0.857142857142857
2	1	0.5	0.5
1	2	0.285714285714286	0.666666666666667
1	1	0.5	0.5
1	2	0.375	0.714285714285714
2	1	0.428571428571429	0.5
1	2	0.5	0.625
1	1	0.333333333333333	0.4
2	2	0.75	0.285714285714286
1	2	0.25	0.875
1	2	0.166666666666667	0.833333333333333
1	2	0.285714285714286	0.571428571428571
1	2	0.333333333333333	0.5
2	2	0.428571428571429	0.5
2	1	0.571428571428571	0.333333333333333
1	2	0.333333333333333	0.333333333333333
1	2	0.285714285714286	0.5
1	2	0.125	0.875
2	1	0.285714285714286	0.571428571428571
1	2	0.142857142857143	1
1	1	0.5	0.571428571428571
1	1	0.5	0.625
1	1	0.333333333333333	0.333333333333333
1	1	0.333333333333333	0.5
