# Supplementary material for: Value signals guide abstraction during learning
Source: eLife. 2021 Jul 13;10:e68943. doi: 10.7554/eLife.68943 (PMC8331191; doi:10.7554/eLife.68943)
Supplement: Figure 3—source data 9. [file elife-68943-fig3-data9.csv]

allb_1	allb_2	allb_3	allb_4	allb_5	allb_6	allb_7	allb_8	allb_9	allb_10	allb_11	allb_12	allb_13	allb_14	allb_15	allb_16	allb_17	allb_18	allb_19	allb_20
1	1	2	1	1	2	2	1	2	1	1	2	2	2	NaN	NaN	NaN	NaN	NaN	NaN
2	2	2	2	2	1	1	1	1	2	1	1	1	2	2	2	2	2	1	2
1	1	2	2	2	1	2	1	1	1	1	2	NaN	NaN	NaN	NaN	NaN	NaN	NaN	NaN
1	1	1	2	1	2	1	2	1	1	1	2	NaN	NaN	NaN	NaN	NaN	NaN	NaN	NaN
1	1	1	2	1	2	2	2	1	1	1	2	2	NaN	NaN	NaN	NaN	NaN	NaN	NaN
1	1	2	2	2	1	1	2	2	1	1	1	NaN	NaN	NaN	NaN	NaN	NaN	NaN	NaN
1	1	1	2	1	2	2	1	2	1	1	2	1	2	NaN	NaN	NaN	NaN	NaN	NaN
1	2	2	1	2	2	1	1	1	2	1	NaN	NaN	NaN	NaN	NaN	NaN	NaN	NaN	NaN
1	1	1	1	1	2	1	2	1	2	2	2	2	NaN	NaN	NaN	NaN	NaN	NaN	NaN
1	1	1	2	1	1	1	2	2	2	2	1	2	2	NaN	NaN	NaN	NaN	NaN	NaN
2	2	1	2	1	1	2	1	2	1	2	1	NaN	NaN	NaN	NaN	NaN	NaN	NaN	NaN
1	2	2	1	1	1	1	2	1	2	1	2	2	NaN	NaN	NaN	NaN	NaN	NaN	NaN
1	1	2	2	2	1	2	1	1	1	2	2	2	1	2	1	NaN	NaN	NaN	NaN
1	1	1	1	1	2	2	2	1	2	2	2	2	1	2	NaN	NaN	NaN	NaN	NaN
2	2	1	1	2	1	1	2	1	2	1	2	1	NaN	NaN	NaN	NaN	NaN	NaN	NaN
1	1	1	1	2	2	2	2	1	1	2	2	2	2	1	2	NaN	NaN	NaN	NaN
1	1	1	2	2	1	2	2	1	1	1	NaN	NaN	NaN	NaN	NaN	NaN	NaN	NaN	NaN
2	1	1	2	2	2	2	2	2	1	1	1	1	1	2	NaN	NaN	NaN	NaN	NaN
1	1	1	1	2	2	1	1	2	2	1	2	2	2	2	2	NaN	NaN	NaN	NaN
1	1	2	1	1	1	2	2	1	2	2	2	NaN	NaN	NaN	NaN	NaN	NaN	NaN	NaN
1	1	1	1	2	2	1	1	2	2	1	1	2	2	NaN	NaN	NaN	NaN	NaN	NaN
1	1	1	2	1	2	1	1	1	2	2	2	NaN	NaN	NaN	NaN	NaN	NaN	NaN	NaN
2	1	1	2	1	2	1	2	1	2	1	1	2	NaN	NaN	NaN	NaN	NaN	NaN	NaN
2	1	2	1	2	2	1	1	2	1	1	2	1	NaN	NaN	NaN	NaN	NaN	NaN	NaN
1	2	1	2	1	1	1	2	1	1	1	2	NaN	NaN	NaN	NaN	NaN	NaN	NaN	NaN
1	1	2	1	1	1	2	1	1	1	2	2	2	NaN	NaN	NaN	NaN	NaN	NaN	NaN
1	1	1	1	2	1	1	1	1	2	2	2	2	2	2	2	NaN	NaN	NaN	NaN
2	2	1	1	1	1	1	2	1	1	2	2	2	1	NaN	NaN	NaN	NaN	NaN	NaN
1	1	1	1	2	1	1	2	2	2	2	2	2	NaN	NaN	NaN	NaN	NaN	NaN	NaN
1	1	2	1	2	2	1	2	2	2	2	1	1	2	1	NaN	NaN	NaN	NaN	NaN
1	2	1	2	2	1	2	1	1	1	2	2	2	2	2	1	NaN	NaN	NaN	NaN
1	1	1	1	2	2	1	1	2	1	2	1	NaN	NaN	NaN	NaN	NaN	NaN	NaN	NaN
1	1	2	1	1	2	1	2	1	2	2	1	NaN	NaN	NaN	NaN	NaN	NaN	NaN	NaN
