# Supplementary material for: Value signals guide abstraction during learning
Source: eLife. 2021 Jul 13;10:e68943. doi: 10.7554/eLife.68943 (PMC8331191; doi:10.7554/eLife.68943)
Supplement: Figure 5—source data 2. [file elife-68943-fig5-data2.csv]

vc_1	vc_2	hpc_1	hpc_2	vmpfc_1	vmpfc_2
0.69560288700197	0.713630952380952	0.511477312038092	0.555672799422799	0.513962663295232	0.504888167388167
0.679909187140974	0.714083456723651	0.505074589310921	0.55526468344775	0.505617385738522	0.558448736931844
0.7286836208149	0.746189083820663	0.517600117229776	0.519093567251462	0.515931168915981	0.539181286549708
0.663423347842682	0.670601851851852	0.502804503348895	0.534907407407407	0.501844262892455	0.479768518518519
0.748888692768486	0.786246438746439	0.510432097261649	0.549469373219373	0.514182236711653	0.553758903133903
0.711646725199182	0.743171654626763	0.49913283098351	0.546736756105951	0.5068865559858	0.538049535603715
0.684798765994704	0.65187134502924	0.493967479740121	0.497671174463938	0.507182784982749	0.498673854775828
0.766973394596213	0.801859217171717	0.512322286439945	0.5296875	0.501260266201895	0.57175505050505
0.780229585762337	0.78493265993266	0.50910383400908	0.503930976430976	0.508672770784884	0.504991582491582
0.758854133193922	0.734717557346868	0.510738593205311	0.517362121834105	0.509962344170935	0.494083771831617
0.7033074499765	0.760805871865654	0.517718136433433	0.521356754658385	0.507896447693043	0.497296555095468
0.811683873890442	0.800968132135895	0.505965179156563	0.542783521303258	0.512451132386856	0.535791910331384
0.755632510326694	0.770073110766046	0.503623849030888	0.529246463077985	0.506181853654757	0.511835748792271
0.755903139888188	0.718225979602791	0.532423404749713	0.526021202361782	0.522664435205632	0.552143384326355
0.734113179957497	0.784960317460317	0.515971331481509	0.60468253968254	0.510245938668899	0.548412698412698
0.698928121441599	0.693730480046269	0.502610347058817	0.528150665124349	0.510918897560083	0.489900713321766
0.749115508600301	0.781226851851852	0.506313453708015	0.553783068783069	0.509989693800252	0.597080026455026
0.749709284002626	0.736993421052631	0.521010264173847	0.556434576023392	0.529257814011692	0.490979897660819
0.761366754647186	0.734957770987183	0.520866877461314	0.530302040007922	0.515605174745551	0.495369875222816
0.724518346657294	0.710137844611529	0.520306239244438	0.554448621553885	0.512027014690093	0.564162489557226
0.736745307560781	0.758928571428572	0.514647363948267	0.536375661375661	0.505143420281228	0.555806878306878
0.779063750194137	0.723796296296296	0.512045152376301	0.522523148148148	0.526049540701649	0.530046296296296
0.676209299526376	0.74699534942182	0.52228013447395	0.532857068040892	0.527493698308806	0.546273148148148
0.745341409654298	0.773449883449883	0.504831950212773	0.491351981351981	0.512840645250195	0.543420745920746
0.694745818927142	0.656785714285714	0.505460152494522	0.489404761904762	0.50640548589109	0.562738095238095
0.748205638414206	0.781571191992388	0.507743952661151	0.524844047357634	0.517130418234856	0.559499341238472
0.72576007255104	0.711188387635756	0.513995267449749	0.512293233082707	0.516541348531928	0.539078947368421
0.808877154095904	0.8071875	0.513323532948533	0.5425	0.509492549117549	0.506666666666667
0.771040906122022	0.772505783166109	0.519058138367029	0.553216276477146	0.513676532686916	0.540610669825344
0.753531551985399	0.733776334776335	0.511626069915032	0.539101370851371	0.509860067783435	0.527582972582973
0.773522106791069	0.767462606837607	0.511425761217066	0.538443732193732	0.492875097562566	0.55420405982906
0.691263237548535	0.705138888888889	0.504185057753078	0.503680555555556	0.504602493017195	0.512222222222222
0.699231672614825	0.735902777777778	0.5169799654854	0.523191137566137	0.515784332414767	0.519107142857143
