# Supplementary material for: Value signals guide abstraction during learning
Source: eLife. 2021 Jul 13;10:e68943. doi: 10.7554/eLife.68943 (PMC8331191; doi:10.7554/eLife.68943)
Supplement: Figure 6—source data 1. [file elife-68943-fig6-data1.csv]

MF_m1	MF_m2	BL
0.999905188958168	9.481104183167e-05	35
0.998434171626324	0.00156582837367623	33
0.995533950765024	0.00446604923497609	59
0.998964016142029	0.0010359838579713	48
0.996255298566858	0.003744701433142	40
0.993754119873472	0.00624588012652776	57
0.999314217333414	0.000685782666585994	36
0.997833883548185	0.00216611645181525	33
0.996835725245244	0.00316427475475623	55
0.99867114569515	0.00132885430484988	41
0.999647197546189	0.000352802453810746	38
0.999766744338367	0.000233255661633504	29
0.999544862716422	0.000455137283578227	32
0.999600424103646	0.000399575896353862	40
0.999817158618873	0.000182841381127329	37
0.992186553162797	0.00781344683720303	32
0.999876892540815	0.000123107459184729	62
0.998268745592948	0.00173125440705237	27
0.999872255585965	0.000127744414035477	33
0.984451730922447	0.0155482690775534	28
0.995175438810774	0.00482456118922574	29
0.994498658286951	0.0055013417130493	29
0.999745778036459	0.000254221963541297	24
0.999766896033133	0.000233103966866884	31
0.995827318552443	0.00417268144755704	30
0.988132303256353	0.0118676967436468	47
0.998799419468773	0.00120058053122685	34
0.998102139703276	0.00189786029672453	30
0.997038901233728	0.00296109876627249	28
0.996875185151368	0.00312481484863179	27
0.998330057927944	0.00166994207205558	32
0.999759852760045	0.000240147239954522	33
0.998394038742651	0.00160596125734897	37
0.999667518254955	0.000332481745045226	22
0.999486498637382	0.000513501362618208	28
0.997840828001602	0.00215917199839804	26
0.999944039416123	5.59605838768051e-05	31
0.997813480223643	0.00218651977635686	27
0.995783182081497	0.00421681791850326	27
0.999088623725489	0.000911376274511062	24
0.999691234048993	0.000308765951006849	27
0.998085110422703	0.00191488957729658	26
0.997710135135118	0.00228986486488182	26
0.996661279631871	0.00333872036812929	27
0.961337848050202	0.0386621519497979	22
0.257553301764916	0.742446698235084	19
0.985945918752894	0.0140540812471055	25
0.710191801914974	0.289808198085026	29
0.997260965601972	0.00273903439802796	32
0.39524120604823	0.60475879395177	19
0.973086434474627	0.0269135655253729	24
0.980602624204942	0.0193973757950582	26
0.992747857549954	0.00725214245004631	23
0.935210425710866	0.0647895742891341	32
0.953005985763853	0.0469940142361475	30
0.915587726109949	0.0844122738900506	19
0.794554074179652	0.205445925820348	28
0.810215057931245	0.189784942068755	23
0.737160168134075	0.262839831865925	20
0.990512410200193	0.00948758979980676	21
0.99631367557016	0.00368632442984042	27
0.919412548065415	0.080587451934585	24
0.812706340606777	0.187293659393223	23
0.890747724612743	0.109252275387257	25
0.222150153447256	0.777849846552744	23
0.993906767906529	0.006093232093471	25
0.038445911854349	0.961554088145651	21
0.163704726923721	0.836295273076279	19
0.0565084251554342	0.943491574844566	25
0.0367221188863759	0.963277881113624	26
0.183623597955802	0.816376402044198	28
0.143217138921495	0.856782861078505	18
0.422462982959635	0.577537017040365	21
0.0455026268862299	0.95449737311377	24
0.419138012090415	0.580861987909585	21
0.0142906814187537	0.985709318581246	26
0.117468250735252	0.882531749264748	30
0.0154800681323187	0.984519931867681	19
0.212809109784116	0.787190890215884	27
0.0493631455510027	0.950636854448997	21
0.0798778024600993	0.920122197539901	19
0.0297322887679187	0.970267711232081	15
0.00414902336656523	0.995850976633435	25
0.0143377382418498	0.98566226175815	19
0.0624936448918738	0.937506355108126	20
0.00834814735865316	0.991651852641347	23
0.0253361532950993	0.974663846704901	20
0.627977110023043	0.372022889976957	25
0.436700546836019	0.563299453163981	17
0.977809873514695	0.0221901264853055	18
0.989134887545659	0.0108651124543405	21
0.964680686086992	0.0353193139130083	25
0.822332890279244	0.177667109720756	24
0.946856103907022	0.0531438960929776	18
0.902374142331959	0.0976258576680412	20
0.874430327544668	0.125569672455332	24
0.973504310542026	0.0264956894579734	17
0.999666696253213	0.000333303746786874	23
0.842408674707828	0.157591325292172	27
0.736995018517242	0.263004981482758	14
0.706701260405858	0.293298739594142	24
0.836780089090858	0.163219910909142	17
0.180178141016678	0.819821858983322	17
0.620904168764529	0.379095831235471	10
0.287524877114661	0.712475122885339	16
0.286422735928987	0.713577264071013	17
0.507733934254132	0.492266065745868	19
0.16718510876466	0.83281489123534	21
0.847152596896654	0.152847403103346	15
0.859274186391845	0.140725813608155	22
0.0867914950330785	0.913208504966921	12
0.518122290888661	0.481877709111339	18
0.285489912420285	0.714510087579715	17
0.290909496363604	0.709090503636396	17
0.670567958381205	0.329432041618795	21
0.437789152462468	0.562210847537532	16
0.81061797346586	0.18938202653414	17
0.314112425559342	0.685887574440658	24
0.602677805773975	0.397322194226025	16
0.455834319272941	0.544165680727059	19
0.278581861750515	0.721418138249485	26
0.124605007384566	0.875394992615434	12
0.113541628090702	0.886458371909298	23
0.311936292303392	0.688063707696608	17
0.808939785467259	0.191060214532741	16
0.379080685063563	0.620919314936437	10
0.0428763662270397	0.95712363377296	16
0.125830877312928	0.874169122687072	15
0.0428763686954054	0.957123631304595	16
0.0400006088886584	0.959999391111342	19
0.152463325054227	0.847536674945773	12
0.44441833832304	0.55558166167696	22
0.0817919990406667	0.918208000959333	12
0.154614900962323	0.845385099037677	12
0.765450111885559	0.234549888114441	17
0.239711553265806	0.760288446734194	14
0.019923553842171	0.980076446157829	19
0.0830261681302586	0.916973831869741	11
0.351996071431322	0.648003928568678	15
0.0639985882796115	0.936001411720389	19
0.144726318670248	0.855273681329752	16
0.0384073263984733	0.961592673601527	14
0.477448771246957	0.522551228753043	22
0.047074283531535	0.952925716468465	10
0.506259537700078	0.493740462299922	20
0.0785205280238023	0.921479471976198	11
0.34763524831789	0.65236475168211	12
0.0874401163247203	0.91255988367528	9
0.0431528164605179	0.956847183539482	15
0.37346396260192	0.62653603739808	14
0.36096350489699	0.63903649510301	15
0.886020138784182	0.113979861215818	19
0.0874401189284686	0.912559881071531	8
0.906343389464935	0.0936566105350652	17
0.000115866102995936	0.999884133897004	11
9.69850801231538e-05	0.999903014919877	12
0.000381581938356709	0.999618418061643	15
5.39522305280021e-05	0.999946047769472	12
0.000154999526104414	0.999845000473896	9
8.17518559298868e-05	0.99991824814407	10
3.1495613252082e-05	0.999968504386748	14
5.31049746058108e-06	0.999994689502539	17
8.64393620907143e-06	0.999991356063791	16
2.58934845906058e-05	0.999974106515409	13
7.31917906414792e-06	0.999992680820936	17
0.000314253030542661	0.999685746969457	8
0.000260075915442027	0.999739924084558	18
8.45584491078081e-05	0.999915441550892	11
9.25585071212893e-05	0.999907441492879	12
0.000361941738268045	0.999638058261732	8
0.000227389489821125	0.999772610510179	9
0.000356326160318511	0.999643673839681	9
0.000118586067689061	0.999881413932311	9
5.39522296861888e-05	0.999946047770314	12
0.0002528737796351	0.999747126220365	8
0.000576154599121629	0.999423845400878	16
