# Supplementary material for: Value signals guide abstraction during learning
Source: eLife. 2021 Jul 13;10:e68943. doi: 10.7554/eLife.68943 (PMC8331191; doi:10.7554/eLife.68943)
Supplement: Figure 6—source data 2. [file elife-68943-fig6-data2.csv]

MF_m1	MF_m2	BL
0.999640603700048	0.00035939629995197	45
0.998281975724365	0.00171802427563536	35
0.997764526851494	0.00223547314850592	51
0.996783416479481	0.00321658352051869	26
0.999666486287503	0.000333513712497298	27
0.999439612842752	0.000560387157248436	32
0.985821835474303	0.0141781645256967	59
0.998181191524617	0.00181880847538283	42
0.998759732372969	0.00124026762703121	40
0.991448172368783	0.0085518276312171	70
0.99639720472608	0.00360279527392042	53
0.999346583281244	0.000653416718755658	56
0.996694128470934	0.00330587152906646	51
0.998302487548061	0.00169751245193861	34
0.999028193780555	0.00097180621944471	28
0.999768025109549	0.000231974890451556	28
0.99893842153254	0.00106157846746031	28
0.996494657338666	0.00350534266133383	63
0.999798162201856	0.000201837798143892	62
0.997303163865175	0.00269683613482538	23
0.98280530038852	0.0171946996114797	42
0.997656455119324	0.00234354488067618	33
0.668103187803761	0.331896812196239	24
0.589076383653357	0.410923616346643	34
0.420458008323867	0.579541991676133	26
0.721058568842232	0.278941431157768	19
0.178762020649616	0.821237979350384	26
0.209164949645223	0.790835050354777	22
0.268315405444962	0.731684594555038	51
0.622818098768013	0.377181901231987	33
0.517472071185452	0.482527928814548	28
0.192570685937781	0.807429314062219	24
0.378182452909192	0.621817547090808	53
0.557274548038244	0.442725451961756	28
0.363085370722314	0.636914629277686	46
0.618842073048748	0.381157926951252	25
0.185104003277228	0.814895996722772	22
0.747378383191842	0.252621616808158	24
0.134785812441107	0.865214187558893	23
0.471216724127829	0.528783275872172	45
0.525804517082889	0.474195482917111	51
0.64350577822333	0.35649422177667	21
0.217472262910227	0.782527737089773	25
0.750113800190949	0.249886199809051	25
0.231670940313991	0.768329059686009	19
0.913019046956291	0.0869809530437086	16
0.504913746735531	0.495086253264469	26
0.384458555517703	0.615541444482297	18
0.143692790505241	0.856307209494759	23
0.484798894298676	0.515201105701324	21
0.550913279591251	0.449086720408749	40
0.688628027847754	0.311371972152246	29
0.129498191183259	0.870501808816741	17
0.563049130905585	0.436950869094415	24
0.816430471511207	0.183569528488793	23
0.497003608176307	0.502996391823693	21
0.684924997156793	0.315075002843207	31
0.8288877786902	0.1711122213098	19
0.113177247003035	0.886822752996965	20
0.339931289248681	0.660068710751319	18
0.652296937690628	0.347703062309372	21
0.692628673279858	0.307371326720142	20
0.341398398317563	0.658601601682437	36
0.107262215909707	0.892737784090293	19
0.194721655007241	0.805278344992759	24
0.957057365930989	0.0429426340690108	22
0.300017098923379	0.699982901076621	17
0.0442277436111001	0.9557722563889	15
0.119898466818425	0.880101533181575	21
0.260973338062175	0.739026661937825	17
0.646532839459166	0.353467160540834	21
0.0667319716575734	0.933268028342427	20
0.913562400932696	0.0864375990673039	35
0.383043453632707	0.616956546367293	25
0.0669740929917133	0.933025907008287	16
0.0375263718453157	0.962473628154684	21
0.731916234074217	0.268083765925783	23
0.0612293949395276	0.938770605060472	21
0.893643692577591	0.106356307422409	30
0.642136490199348	0.357863509800652	17
0.774420586446436	0.225579413553564	19
0.312218239685729	0.687781760314272	18
0.695807891475397	0.304192108524603	20
0.0429072211460559	0.957092778853944	16
0.127056571922959	0.872943428077041	26
0.194738615131392	0.805261384868608	17
0.893267621535258	0.106732378464742	21
0.897906384851239	0.102093615148761	21
1.29321065454739e-05	0.999987067893455	17
0.000194602668716125	0.999805397331284	15
0.000732534691296601	0.999267465308703	19
0.0017642104434946	0.998235789556505	17
1.13277694561417e-05	0.999988672230544	18
0.00121403235875931	0.998785967641241	20
6.37777716858061e-05	0.999936222228314	12
2.96885928966396e-05	0.999970311407103	21
4.50681617848274e-05	0.999954931838215	14
0.00819559595814302	0.991804404041857	21
1.45044232458114e-05	0.999985495576754	23
0.000107939123718027	0.999892060876282	18
0.00103258901450944	0.998967410985491	28
0.00205130073419531	0.997948699265805	16
0.000343251505248933	0.999656748494751	19
9.61593940320289e-05	0.999903840605968	16
0.000512629951265781	0.999487370048734	19
0.0004365974222786	0.999563402577721	16
8.98284473623253e-07	0.999999101715526	24
2.82415612071505e-05	0.999971758438793	16
5.41201906120249e-06	0.999994587980939	20
8.31969727446042e-06	0.999991680302726	18
1.40888091031205e-05	0.999985911190897	16
1.96582096109756e-05	0.999980341790389	15
9.88508581430442e-05	0.999901149141857	16
2.30129651082602e-05	0.999976987034892	15
1.59668744863681e-05	0.999984033125514	16
2.78759682803118e-05	0.99997212403172	14
0.000156182566699932	0.9998438174333	11
0.00348359244872593	0.996516407551274	21
0.000128940076372624	0.999871059923627	11
0.000376803307787369	0.999623196692213	14
0.000393055912307367	0.999606944087693	22
3.89670323163037e-05	0.999961032967684	14
0.000134003367837547	0.999865996632162	28
0.00251745871341275	0.997482541286587	15
3.75138233954286e-05	0.999962486176604	15
5.50913011980762e-05	0.999944908698802	14
0.00112525999464366	0.998874740005356	18
6.76118011153207e-05	0.999932388198885	12
0.00358198867396771	0.996418011326032	24
0.000106225076660394	0.99989377492334	12
0.000339696786145036	0.999660303213855	20
0.000297560685390646	0.999702439314609	16
2.73694621179886e-05	0.999972630537882	15
0.000617310322952079	0.999382689677048	15
0.00853346439310055	0.9914665356069	16
0.000250492708089087	0.999749507291911	15
5.30763189161502e-05	0.999946923681084	14
0.000417130749959415	0.999582869250041	14
0.000120742235337817	0.999879257764662	11
0.000523398156155088	0.999476601843845	20
0.000164982454623229	0.999835017545377	11
0.000118788111465528	0.999881211888535	11
1.87067121212296e-05	0.999981293287879	17
8.1525400505482e-05	0.999918474599494	13
0.000366196497310309	0.99963380350269	17
0.000525272051682639	0.999474727948317	13
6.40763160220841e-05	0.999935923683978	13
0.000517121626617662	0.999482878373382	13
0.000412320212381819	0.999587679787618	15
0.000119137472120089	0.99988086252788	11
0.000276570962093064	0.999723429037907	20
8.94569695061505e-05	0.999910543030494	12
0.00132300911437864	0.998676990885621	16
0.000253821936855167	0.999746178063145	15
0.000160806459741902	0.999839193540258	9
5.31344640978015e-05	0.999946865535902	13
0.000243134660275957	0.999756865339724	9
0.00062869858877007	0.99937130141123	13
1.73912437891764e-05	0.999982608756211	14
0.000110255138134923	0.999889744861865	12
0.000122183605964311	0.999877816394036	10
0.00014461560726676	0.999855384392733	9
0.000154447205159497	0.99984555279484	10
8.15090292747846e-05	0.999918490970725	10
7.08024662313237e-05	0.999929197533769	12
5.08565412343517e-05	0.999949143458766	13
0.000207999912774487	0.999792000087225	16
0.000110434488485478	0.999889565511514	11
9.69535282733082e-05	0.999903046471727	11
2.50089584718415e-05	0.999974991041528	13
0.000876972219520301	0.99912302778048	14
0.000145529274932855	0.999854470725067	11
0.000107300819937555	0.999892699180062	10
0.000107300819532332	0.999892699180468	10
0.000180874912657402	0.999819125087343	9
2.5772270249533e-05	0.99997422772975	14
