# Supplementary material for: Value signals guide abstraction during learning
Source: eLife. 2021 Jul 13;10:e68943. doi: 10.7554/eLife.68943 (PMC8331191; doi:10.7554/eLife.68943)
Supplement: Figure 6—source data 3. [file elife-68943-fig6-data3.csv]

pmsl	pmsr	pmsi
0.571428571428571	0.75	0.625
0.6	0.625	0.5
0.333333333333333	0.75	0.375
0.333333333333333	0.75	0.5
0.5	0.75	0.375
0.333333333333333	0.875	0.625
0.428571428571429	0.625	0.375
0.833333333333333	0.625	0.5
0.857142857142857	0.75	0.375
0.5	0.75	0.5
0.666666666666667	0.625	0.5
0.5	0.75	0.5
0.714285714285714	0.625	0.375
0.5	0.5	0.5
0.625	0.75	0.5
0.285714285714286	0.75	0.5
0.875	0.625	0.625
0.571428571428571	0.75	0.625
0.5	0.75	0.5
0.333333333333333	0.75	0.5
0.875	0.75	0.625
0.571428571428571	0.5	0.25
