# Supplementary material for: Value signals guide abstraction during learning
Source: eLife. 2021 Jul 13;10:e68943. doi: 10.7554/eLife.68943 (PMC8331191; doi:10.7554/eLife.68943)
Supplement: Figure 6—source data 4. [file elife-68943-fig6-data4.csv]

v_r	v_i
-0.202971679255302	0.0579003054480155
-0.207966806350032	0.0306589665912572
-0.224185804161622	0.0106799421714876
-0.199996568378446	0.00296034297209957
-0.189808321445059	0.0414641455318795
-0.242137049984056	0.0499314906500098
-0.226996497447373	0.0480702435013176
-0.224376234041319	-0.0122655492506613
-0.193677367600758	0.01185594644932
-0.248362575952721	0.0130212019558038
-0.231223032458256	0.0358659870812044
-0.215220140565714	-0.00693717987409131
-0.174937336204379	0.0798900523372507
-0.22512614071155	0.110604077167979
-0.227617993172173	0.0152812687230285
-0.194606495179539	0.00345064241073789
-0.23465533666304	0.0242451785103149
-0.179325485508992	0.0783855913717478
-0.227147738492074	0.0592052037360072
-0.172806631835251	0.0570053975579387
-0.197810464664303	0.0464244150632994
-0.229357826823773	-0.00919624200408059
-0.199647595463763	0.0324867800619781
-0.194605704943228	0.0486395820804932
-0.19996050391317	0.0443297154728916
-0.184116796803886	0.0476600452309376
-0.124661570202487	-0.0294837215385566
-0.175640884860697	0.057014362620369
-0.192307078282265	0.0198220603181866
-0.276193466757223	0.0185631231872724
-0.177787385483065	0.0560811403567727
-0.269758441842175	0.0916025307050462
-0.205249790037707	-0.00598758262945265
-0.198848755758025	-0.034802087963117
-0.171788295320972	0.0416751613676445
-0.201401330732357	0.0359249747609517
-0.226970586162358	0.0774770178887958
-0.213568218127646	0.0797561219922582
-0.240820408681462	0.0353301817255057
-0.203010687871282	-0.00667286188574251
-0.201986672542858	0.0218340885736834
-0.1671277821392	0.0595346945989274
-0.213436367035178	-0.00636369091189876
-0.228716278100963	0.0295651142996549
-0.152578602561052	0.0372714998778891
-0.241521899623604	0.0129166595129954
-0.256305433894174	0.0463231034225475
-0.198176922661153	0.0211864251870012
-0.234609015037446	-0.0122763124006813
-0.202822973844058	-0.00789217901059636
-0.20251476212829	0.0392727185363779
-0.228999997753239	-0.00115317204962423
-0.233567661339493	-0.00528478894094087
-0.15287833696697	0.108187658397171
-0.21603462522211	0.0452976199381211
-0.213337715991125	-0.0258376356371894
-0.206747448338803	0.0375864287517053
-0.215436347992991	0.0847021378652616
-0.222478547974925	0.00222603452479087
-0.233316906327921	0.0770277501127618
-0.187177402710705	0.074580255803666
-0.193989650842023	0.0340601172115894
-0.233481396475935	0.0706394198962906
-0.194984282521031	0.0604547801459406
-0.252526083704406	0.0299633048648773
-0.210688707005148	0.0529900121648702
-0.225476139741785	0.0524594186682912
-0.153092343640171	0.0724036495877277
-0.196327272811004	-0.00128335356715764
-0.171895069116939	0.021336347039663
-0.174892441677988	0.00894736545609365
-0.223195618026734	0.0234313425732361
-0.175262697522479	0.0188839649053132
-0.253686530529283	0.0942323635112171
-0.232867942130597	0.0308860870556169
-0.186833596831697	0.0173649519018864
-0.247963862926418	0.00220443772983103
-0.222692964572329	0.0382976619034398
-0.152688088688253	0.0314544928198592
-0.214723711655917	0.029378058388697
-0.199942394947743	0.0278873815142004
-0.21133551612891	0.0201488247932479
-0.205253132969021	0.0335981732235369
-0.217502400271428	0.0350987134907925
-0.211247058054433	0.0365743377176551
-0.220077998055006	0.0271735293764187
-0.203818448570982	-0.0163911544220589
-0.248162715866594	0.0191004704423745
-0.138270025542165	-0.0221757824224307
-0.221206657841321	-0.0153737045632622
-0.180029550195749	0.0319447599541427
-0.234542860022182	0.0110558310086873
-0.217213611112338	0.0131775264617158
-0.207575558175518	0.0662686120769105
-0.267174889407422	0.0430388150624796
-0.21988437226471	0.00450830879168518
-0.211643754456159	0.0423925481796854
-0.190139611750068	-0.0120083012310177
-0.192867713129951	0.0271168559348403
-0.162965804131112	0.0391199618879757
-0.242835156342407	-0.0131030858000024
-0.183053094334947	0.0684476575876279
-0.183172260261088	0.0246310678685456
-0.156719414122061	0.0040483798910671
-0.22636021583757	0.0178641743585278
-0.205034647374271	0.0858261525366909
-0.239866151459799	0.0409735986513372
-0.205908496260211	0.0803531517161908
-0.198944433272753	0.0470612789648782
-0.203274924272556	0.0299050473692076
-0.168516884029383	0.0351102672251119
-0.183167798310431	0.0931611962306224
-0.234552189941158	0.0242753627271853
-0.223650383397069	0.0757326504010705
-0.17823145528015	0.0181097272204905
-0.226459930314932	0.0307882223935163
-0.20140887085604	0.0550687670855986
-0.214117563365307	0.0606964900417181
-0.186859063616277	0.0189548431837981
-0.178471571584858	0.00509189671561316
-0.180885007198746	-0.00710975311705975
-0.212563675486484	0.0460327518982866
-0.184711571798534	0.0432093899959693
-0.191934483459887	0.0405098780944325
-0.22622827535019	-0.0401516207148174
-0.174203246672066	0.0794845195561616
-0.196656595590366	-0.0237739008480636
-0.194103168114615	0.0522865141689297
-0.215876782043958	0.0204215802906885
-0.167345555155772	0.0218515057805251
-0.181354339806882	0.0895701852721472
-0.208699378025358	0.0515184440285895
-0.184255038031277	0.041470751192532
-0.211793417908269	0.0632998893068643
-0.18146340766054	0.0458061932994392
-0.123487781737035	-0.0477795449710965
-0.196663677345911	0.0203464895713
-0.237402912333235	-0.0044645046521728
-0.181485088853892	0.0260369035980847
-0.242754379930842	0.0958832110869592
-0.232824377955971	-0.00896662161767964
-0.194148602383739	0.0213092126618515
-0.226079683946117	0.0542893296727244
-0.216333491569955	0.0510577913620793
-0.202929771602856	0.0389951699721706
-0.219275386940666	0.02385081046792
-0.160433358574626	-0.0129896687701345
-0.216873682220158	0.0197921311046233
-0.214570737036961	0.0422351332158377
-0.226846735771737	0.0598855347907168
-0.192958440717234	0.0837354430768947
-0.167439558550498	0.0287575706645756
-0.214930675976915	0.0578215488974847
-0.260769840398694	0.010590855984057
-0.24915508437456	0.000408815860130862
-0.205173556861631	0.0270004178185517
-0.219599197221932	0.060619857596969
-0.153835406409061	-0.0160454398002439
-0.184587286646734	0.0222960999016814
-0.226605082039574	0.0286208061446248
-0.216594464006866	0.0186031921349348
-0.175626482253116	0.0789240432636596
-0.198209838561813	0.041471390254621
-0.206453007728875	-0.00344821099979542
-0.206421784380208	0.0482021800197822
-0.203567860007259	-0.0289798505994631
-0.189606852946802	0.0312364984545765
-0.210619088306958	3.91625923721328e-05
-0.194472972171311	0.0411589412727288
-0.172165608788008	0.0455967616071019
-0.201631133817948	0.0534924152820413
-0.226896185122243	0.0556468818941561
-0.196998089655183	0.0577277629921122
-0.144227899894622	0.000291610734301506
-0.213580574525586	-0.0278015941184112
-0.220115756649174	0.0755215935206819
-0.249267550458358	0.0641041192722699
-0.192023968816455	0.0531780748773559
-0.267346634251319	-4.70365818021623e-05
-0.234717165077259	0.0470088610792989
-0.264169225841906	0.0326164063420186
-0.17234701408122	0.00764620622782852
-0.150223019481378	0.0226019429355095
-0.184770069984489	0.0505098436491248
-0.216123498785853	-0.0156450441780059
-0.25158648836755	0.0556022372415099
-0.180644409015477	0.0788319078261703
-0.197550018471716	-0.0207399421075223
-0.240171140075299	0.0551982005306748
-0.235439459098295	0.00932479868659353
-0.211091631750751	0.0569074494302954
-0.228674871870119	0.0463322893768894
-0.195810877943143	0.023992589252552
-0.21178100402576	0.0616244609303777
-0.211147139528442	-0.0136035130241394
-0.2369711189794	0.114378229700128
-0.205065605028806	0.0652925098430509
-0.137834930555409	-0.0414798947250364
-0.228676051803009	0.0205312439199772
-0.250861920714747	0.0280072679423343
-0.195958162704368	0.000988573619800426
-0.208915166410677	-0.00852751355004666
-0.262917546135721	0.00623014766653396
-0.188699828381824	0.00952250042217551
-0.236542545442573	0.0490578224425153
-0.259620776742978	0.0169898887866432
-0.189966464763567	0.00925600821573802
-0.190353792911439	0.0733944931424988
-0.202016424133064	0.0549964757400498
-0.187176344784611	0.0764359827023726
-0.20028896158836	0.0635916736796528
-0.216346741275238	0.0564651655007435
-0.183891912409518	-0.0260922133765264
-0.225391616443735	0.0759461893555232
-0.223661054386176	0.0334660465148681
-0.201604231407569	0.01605720041809
-0.190781867748754	0.00228268355718708
-0.158793397404561	0.0123252325633886
-0.211856847533598	0.0307623663462142
-0.199755020606384	0.0838756650627037
-0.223239227114738	0.00184432889244468
-0.202113404850544	0.00514241501586721
-0.193118081436282	0.0380782645625958
-0.205455833648111	0.0397976286963344
-0.192520656943661	0.0221733561490595
-0.243045718808205	0.034303995749658
-0.219683058498942	0.0773447503136568
-0.181960363211166	0.0377597807920281
-0.205587420170771	0.0918085326660084
-0.202976613096006	0.0728641162320952
-0.236940526223406	0.0543541985600566
-0.223160537527925	0.0747884425852106
-0.194831103366231	0.0278573260129259
-0.207823497323519	0.03321861082072
-0.232411434612621	0.0346806573492355
-0.210849545549811	0.0340331603845114
-0.17995960981856	0.0478669052588674
-0.177797872482164	0.0675452687765999
-0.245420680003805	-0.012279500153876
-0.187480024209601	0.00584492058554031
-0.216689937114266	0.003947793010044
-0.195344824330564	0.0181857957511246
-0.172712205877904	0.0651047993437007
-0.205935487257385	0.085847163790008
-0.163778644874896	-0.00182800650724652
-0.266202427930692	0.048122603224344
-0.188984194626622	0.10194283332194
-0.2028777199514	0.0307324914120012
-0.188166235677689	-0.0205370134760024
-0.221652301480644	0.0339219410709444
-0.201811593403207	0.029752577988752
-0.20940934694255	0.0224202034871713
-0.23077481209636	0.0619809064410913
-0.223451140126412	0.0272240653780712
-0.198121141897682	0.0656636896662991
-0.217364747173265	0.0538818382242686
-0.238441287416493	0.0159981883995166
-0.18463950219656	-0.00582835337803156
-0.209329369615624	0.0180371400421301
-0.179384270677007	0.0537518880472997
-0.163922208754748	0.0422932614154955
-0.208498092222654	0.0150932978308665
-0.256577115507156	0.045219050913375
-0.227372831291462	0.0323556155241923
-0.256556443873123	-0.000930492846753117
-0.194175151267108	0.0259344547960585
-0.245127242132076	-0.0108335835369594
-0.161629102700968	0.0456071015098373
-0.269211037911041	0.00877215310294466
-0.166943180745292	0.0246059866990903
-0.209741732144855	-0.00866570399388689
-0.196431858019398	0.0707197326369411
-0.188114252780981	0.0360669005208183
-0.198538831122995	0.0186501535559503
-0.217227952131654	0.0222503198193515
-0.18675195280163	0.019437609833439
-0.206713694846461	0.0160394890704124
-0.196083758298324	0.0832350014218602
-0.194319947391702	0.0436987597660911
-0.221997970237269	0.0495573155150042
-0.140433858516507	0.0802247719510019
-0.211959119339002	0.0641131553416583
-0.203029891523158	0.00906139944192963
-0.200522129714372	0.0337333302088875
-0.236147279297163	0.0619904440567336
-0.163155341998713	0.0805688210497119
-0.228352076807652	0.025303445108964
-0.193751173559153	0.0952864455759218
-0.212569288276709	0.0537877023683846
-0.249042097875742	0.0441010349906087
-0.189667906786334	-0.00553569484342664
-0.219403015774955	0.00305996775183681
-0.175940473935066	0.0669736366203294
-0.174914141135096	0.0580530735274092
-0.205854670065137	0.0384047589870633
-0.180416592625904	0.0433730816052201
-0.23806720807744	0.0424446670991645
-0.200630795144207	0.00271254501263873
-0.204037856487891	0.055664459127107
-0.184067243627245	0.0807001542897239
-0.191708597555579	0.0248084347765752
-0.205177533435766	-0.0100065429553429
-0.219960264181619	0.0341636287135586
-0.248040728368002	0.0357069603952932
-0.163573761468168	-0.0828963819556204
-0.199664206385402	0.0401581527014847
-0.175071236430694	0.0453969313749497
-0.232122657218754	0.000630520287069447
-0.211405214029244	0.0692255356092746
-0.232450373821862	-0.00704203520060759
-0.194579338694463	0.0354048980479148
-0.213520230783167	0.0555753035719766
-0.202415119987235	0.061148334841794
-0.193161816909458	0.0159920592433129
-0.214693277989701	0.0108182077087582
-0.238419417932024	0.0772684224660994
-0.197151785543503	0.0346768560549781
-0.169561577979113	0.025904802066277
-0.199458753654245	0.0646115235838698
-0.209945607169127	0.0416891354151618
-0.222970883491815	0.0576746177212563
-0.225702544846403	0.0590831483718559
-0.246954744540326	0.0348841231620414
-0.225372388547307	0.035424360815418
-0.154761214700499	0.0503736418874371
-0.25006998973544	0.0683662023772973
-0.178506142302001	0.0347555244293843
-0.221998972526022	0.0136306157869363
-0.184553065064536	0.0702430685129216
-0.224334649272319	-0.0239866143152548
-0.229336107036462	0.0380041426164217
-0.249904871175424	0.0525817267349347
-0.223480456534373	0.0209717355747684
-0.169621084809214	0.0659320772733298
-0.224100929619586	0.0487006091259216
-0.18421476508982	-0.0201697936738372
-0.210054405848463	0.0337394037946204
-0.260139699703238	0.0508368916128054
-0.214494744413259	0.0620684319908689
-0.20139200907693	0.050849220101539
-0.179479235380578	0.0340660157969629
-0.169714323298508	0.0569244987943702
-0.230437743904941	0.0997220935133417
-0.220330058526937	-0.0585795416075598
-0.213158864495415	0.0601314504533454
-0.225094366878092	0.0746926899402631
-0.217230549166984	-0.0139255497654887
-0.152429036426164	0.0378189958691436
-0.146783050325482	0.01235427540945
-0.186751628566923	0.0123044634255728
-0.20224859879415	0.0240796062576073
-0.220120354809708	0.034195576392658
-0.19906406523903	0.0672605206622583
-0.249539588840042	0.0319672070485622
-0.24126634540698	0.034694862185164
-0.242184226183802	0.0100464085870592
-0.206631836389302	-0.0112884480809491
-0.171789362633041	0.0130696713584658
-0.192072611786821	0.0755479266420358
-0.185048841672849	0.0644893776193988
-0.22225657597165	0.082371036521389
-0.243894640657074	-0.00731610915322545
-0.219555302600619	-0.0198324641151829
-0.263238886209267	0.0661553052705658
-0.216819333867796	0.0192765196700749
-0.218521878794655	0.0446280730573789
-0.219659298751347	0.0657799520262702
-0.232854729969858	0.022856392593805
-0.180171561762372	0.0304885689658831
-0.216853087106396	-0.00880097984562417
-0.17875754075524	0.0604643368119029
-0.200951261956994	0.0486551843858879
-0.234889878488346	0.046385622701029
-0.176671976771283	0.0554675188622813
-0.271576420807857	0.0130060632375399
-0.190804021889572	0.05760541440214
-0.277918389846253	0.0504597572592568
-0.192458582773004	0.0226921517032325
-0.251709718052738	0.0265771348142082
-0.218392252574292	0.032139442574919
-0.172159027895271	0.0606588740973466
-0.21305770592836	0.0266881324046754
-0.183528151625916	0.0849939283185838
-0.209435807532023	0.0369298027056817
-0.146075780946284	-0.0174433129372399
-0.175860840097117	0.0789830398968018
-0.198808820582923	-0.0232142102813412
-0.194137540485303	-0.0299627549564975
-0.234346627615426	0.0727927153278958
-0.217442435536245	0.0538941311577893
-0.21344604872759	-0.0107219217629326
-0.24592641248996	0.00866382453471959
-0.191828982862981	0.0636093337244727
-0.247335754929799	0.0272962634445167
-0.231288327164739	0.0403529277925624
-0.250238842329124	-0.0515132689174733
-0.18100406870915	-0.0178265432861773
-0.111138258756428	0.0294726255204725
-0.219184685647924	0.0313203997377705
-0.215118231173602	0.0386032085115949
-0.206935680316628	0.043171666297224
-0.223149586430765	0.0337384172056792
-0.178580122011447	0.0745785669183722
-0.190733436606636	0.0362114421984774
-0.215144854167414	0.0162642926524215
-0.21459901060718	0.0366862695170046
-0.260091789528743	0.010076001319703
-0.194851011868096	-0.0171834986635563
-0.181482554772084	0.0140294182655989
-0.159360452509876	0.0557030775541011
-0.241911279062875	0.0872999187066807
-0.211367175886638	0.0160755922896352
-0.124312278029933	0.0696065785216723
-0.248055395865073	0.039947143093218
-0.252686586063889	0.0538784001570606
-0.253438120485788	0.00256786482943649
-0.222842155926852	0.0416545419793702
-0.219528995207951	0.00512970353732356
-0.22296309228032	0.0817123249604219
-0.193436744229574	0.01684203862654
-0.195903614843718	-0.0216402943240718
-0.226097569592717	0.0374512693202207
-0.209333336119184	0.0380370352410965
-0.193033271153391	0.0312141757658242
-0.202625183775368	0.00541582272082719
-0.265212694423	0.051409232873307
-0.238363119414123	0.0379927939706249
-0.174934066901864	0.0282720802055468
-0.188889178056435	0.0129089205206691
-0.196666007339739	0.0794269958447908
-0.18807423972333	0.0725324400079025
-0.199676446649402	0.0547825947471423
-0.166875451104394	-0.0273826223116806
-0.238543286957191	-0.0162573513715307
-0.184630334181185	0.0355737604229529
-0.21419891622197	-0.0232486662839468
-0.169822038301176	-0.000461073717491767
-0.215957037716912	0.0538225246034805
-0.181096111428411	-0.00737921177629119
-0.196291529492368	0.00700402185350957
-0.199384136962102	0.0425557196974823
-0.220941067403586	0.00286043024973981
-0.181504306540976	0.00139986380677926
-0.197314318426008	0.0370319008295397
-0.176277638468734	0.00885136376327267
-0.182103050493358	0.0129703764231981
-0.224086822389926	0.0412529923408471
-0.259467344453865	0.0839413059339849
-0.207664099966883	0.109158938769084
-0.222219796258962	-0.0190142809741398
-0.206184661699031	0.00880137054013863
-0.205569317658114	0.0266605743276535
-0.233215977142764	-0.0003110956655904
-0.2294381406031	0.0524975083356234
-0.232404016066856	-0.012089756435575
-0.223800668250308	0.0168321720381616
-0.191978111824868	0.0413700900604121
-0.168755322115315	0.06259889453612
-0.257586634497059	0.0524996981745567
-0.213176005066674	-0.0404856593928559
-0.213714736798706	0.046374087651441
-0.216102555260409	0.0309132285277856
-0.242877842474676	0.016381311613393
-0.237499727050616	-0.00626748816021527
-0.170214705482494	0.0524859709860085
-0.138895517757741	0.0642461889340383
-0.213967224120888	0.00637542596221141
-0.252352323391386	0.0117322400256165
-0.191090077951133	0.0207305328870324
-0.185992347716437	0.0616252467895646
-0.208814661991165	-0.0388182437266448
-0.228818805239076	0.0186749870687359
-0.201090387698115	-0.00195381073779832
-0.187088664527911	0.0400299250241103
-0.205664688739582	0.0442438739849164
-0.206895113774889	0.015170555321328
-0.209659757142018	0.0648836160417037
-0.18331840188865	0.00232004923343099
-0.154773599734829	0.047023909443818
-0.177602281853766	0.0783768216508131
-0.190907599341745	0.057761228194017
-0.209635600716046	0.0559613420476932
-0.202099617470003	0.0359895055389301
-0.206175042844898	0.026766426785565
-0.21265093538536	0.0495022768733074
-0.166576490463673	0.0525014411084918
-0.224013359855032	0.0349087790821302
-0.214850022684778	-0.00531358847285529
-0.216491200280856	0.0304058967827753
-0.232719283946946	0.0563506482322483
-0.199430593860486	0.042987675250873
-0.176734480271957	0.0108016144129164
-0.2354044771035	0.0990965802700073
-0.205679461570745	0.0529413591500761
-0.246596279599237	0.0652039478839089
-0.236897620308188	-0.00542584687785835
-0.190556005242703	0.0348606929575478
-0.201708993375344	0.0309830289531643
-0.231382166456785	0.028872221864309
-0.192455188084379	0.0432299939905255
-0.13911686072256	0.0330132009371508
-0.257076814416303	0.0147111299640751
-0.190432004119931	0.0677644101848335
-0.176841323577418	0.0257053530917414
-0.229563434178176	0.0227639945802857
-0.217663622322007	0.0769370794959245
-0.158238758880281	0.0145595896372779
-0.16170204347768	0.043979957978196
-0.19138761919711	0.0273350096807669
-0.205503339110152	0.042248844608874
-0.202337707236551	0.000925013374215577
-0.174777688738547	0.040190476570194
-0.192547091611139	-0.000953286074205417
-0.205453276763837	0.0433586443723741
-0.177605815781301	0.0489716520692672
-0.211596066951913	0.0362360476472358
-0.182423246357047	0.0394421434180857
-0.185763483284386	0.0237249369706555
-0.230973366379692	0.0612606642681358
-0.229183028588051	0.0698026985206751
-0.170812842654901	0.0380774912898661
-0.23570679928757	0.0403719901309855
-0.215768090673083	0.0681863258139319
-0.211255558916867	0.0529105456912657
-0.201671523483986	-0.00658106554475457
-0.219096685353637	0.102483763712953
-0.216386534696542	0.000712131121837212
-0.175025859812594	0.0954969111929024
-0.162051607345333	0.0770797540764039
-0.177354182040348	0.0258087623333205
-0.260855607036746	0.0189763862011655
-0.189048119304332	0.0350100017406386
-0.195032313825404	0.0448468794041879
-0.193458062124285	0.0280455237293991
-0.112574741820384	0.0443989366767844
-0.174271613637283	0.057100545052983
-0.23625717888677	0.0205380829469145
-0.232402039888293	0.0726627087320358
-0.199586796098511	0.0231839148610926
-0.162976186108022	0.0389359791730662
-0.20549763580725	-0.00204215923476381
-0.207040031142503	0.0181438744502292
-0.215410681136286	0.0761863050510652
-0.222825166156367	0.0534286902872755
-0.242834774223827	0.0287365077942383
-0.21407702772551	0.0316935817182681
-0.207537752935981	-0.015484753815145
-0.248707180420621	0.0117114486776834
-0.213470413717168	0.0512907294354359
-0.226940138130873	-0.00351236639777103
-0.207465758100101	0.0307239293977088
-0.202464753332845	0.0676767435669881
-0.225716463620298	0.0942059918788714
-0.268406299677717	-0.0169500305547785
-0.212370390770478	0.0507385089971272
-0.235138427508951	0.0603359564065117
-0.231609750156113	0.0674629475216654
-0.254285974791173	0.00578801370335913
-0.230471919030066	0.0340397656629134
-0.215350073114039	0.0837195372029601
-0.247793401974054	0.0291398704624127
-0.207200891780094	0.0338778246640241
-0.244871741739393	0.0700666181602212
-0.229615995458334	0.0041926376434126
-0.175100675598498	0.070411635550461
-0.226174327437697	0.0287982006152272
-0.156475851684173	0.0598147404964601
-0.155395557563671	0.0779855540366584
-0.235037523645502	0.0348546778655843
-0.258766869947652	-0.00752870458621618
-0.194088443203562	0.0572844096884808
-0.231650953598344	0.0524675101454599
-0.256358163374071	0.0661298708415136
-0.221261742794595	0.0925888800930283
-0.201214680704761	0.0772471809836938
-0.190964144388273	0.0386288661246869
-0.209700273162009	0.0306660023587161
-0.198077038238151	0.0467113663401881
-0.172280690137494	0.0337629482339165
-0.248364693285376	0.0314382296787795
-0.190915790392655	0.0342642212707448
-0.17788946502767	-0.0050427090425717
-0.201422290175325	-0.053650906746639
-0.249819374525424	0.0177657747446794
-0.146757300629481	0.0504988758692451
-0.178523489944027	0.0843910177039322
-0.208197215532232	0.0545827941211489
-0.149222665878362	0.0192309320707349
-0.216602575682765	0.0720013269835321
-0.232083885032896	0.0580564251825041
-0.226763272939375	0.10376100005051
-0.192277926999553	0.0394983829244619
-0.1991015406789	0.0617014331402556
-0.201435706459373	0.062549228800719
-0.198778951061057	0.084294611835431
-0.251219674492712	0.063292545587961
-0.213153508104314	0.0345381568055744
-0.184850181222189	0.00206122554570498
-0.184018979588016	0.0469390863068204
-0.221045201264968	0.0350373872948998
-0.204874584875445	0.0229684259841845
-0.238561901504318	0.0364480297431619
-0.168614871692772	0.0108903043433177
-0.180463113423985	0.0431266601669028
-0.215471643061711	0.0379846408266284
-0.207198306524949	0.0231650454797312
-0.210150090154473	0.0578558741106207
-0.207141734954216	0.0363247569231718
-0.202179261032142	0.0792195060025163
-0.234357752313539	0.0845892324077738
-0.224455481491158	0.027676755160726
-0.250294172030412	0.0756688629492404
-0.182801843596363	0.093838834551437
-0.162828111179274	0.0034321030124852
-0.204347261083658	0.00191012772235621
-0.19374123663037	0.10315839910747
-0.217070560167519	0.0554543204295572
-0.205504715168348	0.037831141027056
-0.240990597109588	0.116553032354571
-0.208874659246057	0.0291133107517303
-0.218474011165254	-0.018539347539639
-0.185012657542281	0.120197505009724
-0.218612850539808	0.0710940191622663
-0.245374197494639	0.0493360263153682
-0.157812352675664	0.0390584800511206
-0.189321579941101	0.0407117326070522
-0.136288505650493	-0.000207606120509685
-0.234920168733624	0.0526172487747143
-0.188713609683559	0.0339579214409819
-0.162767795413842	0.0516127732930511
-0.220181307385358	0.0480570151091544
-0.221332395532899	0.0616809048511517
-0.2331577270876	0.0562478334040337
-0.17395492252775	0.0310965219142716
-0.208253429021459	0.0217550503254652
-0.157369083866504	0.0402579576703799
-0.200072076075331	-0.00892798251629418
-0.20430033034228	0.00416457681768445
-0.238054366482766	0.0540825738798986
-0.215084313026502	0.0490082487994582
-0.239531695717908	0.0188510624994264
-0.208422254074572	0.068260737951558
-0.248118293695834	0.00721741940744269
-0.180544909008307	0.0302960723081875
-0.229213404392885	0.0129603529336748
-0.222672582459107	0.0407249535063806
-0.189861790412106	0.0236809631212781
-0.215104310389582	0.0841338235478954
-0.262637790924958	0.0238097619867733
-0.25972089380349	-0.0118420450633581
-0.171210284616376	0.0154930624958987
-0.203912156214334	0.0583623566887179
-0.196630591965723	0.064227674670023
-0.161102356738682	0.0603362330719373
-0.178522223152954	0.0527343191647153
-0.230291095487264	0.0664402717236489
-0.168607072348318	0.00445712094388895
-0.141006441205815	0.00350336574979704
-0.243873131516861	-0.00162451651586504
-0.177222650787459	0.0154088733675143
-0.186925964767041	0.0579064972483578
-0.222435403470985	0.0758069159555937
-0.256509998808113	0.0452678514046164
-0.209275865817094	0.0429651037641258
-0.193966286996718	0.0555662403122924
-0.238441176331768	0.043804035962791
-0.182033257123388	0.0506334794966171
-0.228563024834803	0.0724982175844738
-0.191856757303721	0.0281180413008038
-0.211631751890361	0.00647583045354905
-0.23078985730127	0.0652087221145051
-0.184715821646309	-0.0259660223525494
-0.227127245158638	0.0280257974162111
-0.188096718956127	0.0164877803333655
-0.217724723706464	-0.0253849612244073
-0.155412601590166	0.0372957449860147
-0.220387298758412	0.0377757398258015
-0.175113124881384	0.0275368508072003
-0.22227052968577	-0.00155193589301955
-0.205484248218398	0.0627689731572058
-0.221586879505234	0.0153124931856138
-0.225398718163119	0.035975306481311
-0.200538183618741	0.0413598097049199
-0.186466911173108	0.0339763233049691
-0.207069019733793	0.0725343483323942
-0.198554673276273	0.055988849163377
-0.217439223396747	0.0816301842763895
-0.220059878609834	0.0299025227085258
-0.204607457688923	0.042319585939002
-0.254464514058749	0.011658212329746
-0.184369925445609	0.0427298281707371
-0.165137889869688	0.0121403958458551
-0.252148669912408	0.0597944146211474
-0.226660014014035	0.0184197380955902
-0.210522767656828	0.0356323529925267
-0.202829753748589	-0.00115455338621157
-0.197626655925388	0.0404396039824571
-0.234777771780796	0.0431961977183334
-0.231183692444398	0.0244078986820165
-0.226818593884481	0.0507074468905921
-0.223031409762096	0.0109627514168966
-0.20054749391903	0.0598087997281064
-0.255284172948647	0.0179070160778141
-0.206221900971673	0.0394585366665458
-0.199228373468721	0.0839983908451823
-0.224259587513412	0.00733433851027443
-0.208812943328814	0.00338698099282264
-0.20468661935106	0.0877990463439107
-0.204516610859521	0.000695060320379026
-0.199056940321673	-0.0128669865188987
-0.188637575540291	0.036753304787925
-0.270264201925233	0.0187406010974214
-0.200429688133051	0.0286822115692611
-0.208866885350195	0.00527784288411126
-0.194379771253236	0.031171899665521
-0.202308805319452	-0.00184358332179407
-0.163581684052864	0.0627729188531462
-0.218579532711729	0.00151111123851699
-0.218418828232432	0.0273241441288609
-0.200904347825755	0.0465563237820757
-0.20433492407227	0.0213632746739282
-0.235159964164232	-0.0154352560886351
-0.172623162099486	0.0647585527906919
-0.16787573024238	0.0827295955162682
-0.173676145257945	0.00746835399252932
-0.185570311368647	0.023814577498718
-0.228841008110405	0.015316356207966
-0.175965736269671	-0.00412252516816275
-0.187227377871078	0.0348185523627716
-0.193723339543942	0.102425916996849
-0.198095596560244	0.0610726264373299
-0.259262648341774	0.00596207865623255
-0.158234531094698	0.0737238141391362
-0.207936230883537	0.0503584133022456
-0.211648200845077	0.0826934956957597
-0.193305296106928	0.0323061214115716
-0.208568119107966	0.00964242637504553
-0.204990695093916	0.0471316052628848
-0.253125357892246	0.0628845720554515
-0.190983938623704	0.0755109586643206
-0.204506300627402	0.0415903988536188
-0.215692519238547	0.024156270710088
-0.213303284724577	-0.0148892023509952
-0.258819878809858	0.0335302889810595
-0.193797994757849	0.0279546065815596
-0.204268046059515	0.0659762751800552
-0.189236197076928	0.085913041874625
-0.236949945748069	-0.0165644937175808
-0.226522371221742	0.0242067038778654
-0.153754333701071	0.0400598801086895
-0.24119452778127	0.0507187402383266
-0.241400124851912	0.048750593194815
-0.180554312714494	0.0292696472715869
-0.195583545831518	0.00362084568507093
-0.230843203672901	0.0575380269215939
-0.144433452990855	0.0484217698800479
-0.173780458364013	0.0342831795078028
-0.211429898061727	0.0949403852560445
-0.291621664761222	0.0525706738407
-0.225578573233267	0.0154916670656166
-0.225597083759586	0.0424027280472853
-0.188076517439307	0.020681064015395
-0.210582797681665	0.0323163597763805
-0.186506238521631	0.0106510712502275
-0.222373696678761	-0.00682441579189225
-0.25183206769744	0.0008411399286673
-0.14542860599086	0.023183828180521
-0.21220307948632	0.00344566273901203
-0.211035224349555	0.00538710177378499
-0.235725134402356	0.0290806639627084
-0.233655920328388	0.0208190273914385
-0.202692278668593	0.0223634045345326
-0.231083592749095	0.0483134406557459
-0.168852065910789	0.0310690862416785
-0.231104169703185	0.0381535697591152
-0.178771597901667	0.0295926629507423
-0.208951607876943	0.00868244127925
-0.224370063395092	0.0754707321531192
-0.228696909370621	0.018991932939055
-0.215625623180528	0.0651123771669182
-0.189125741683032	0.0473060569629671
-0.207199576573333	0.049566608198598
-0.20055479499398	0.0507288595119917
-0.196077536705783	0.0664470176333872
-0.201381423102791	0.0477368837840021
-0.20468118492253	0.0214704163442878
-0.201843195156443	0.0358038579328853
-0.209555033171013	0.0475355959534191
-0.223432613528948	0.00708797385900495
-0.212720316682382	0.0226501330482334
-0.212941286757737	0.0516661655348051
-0.168156030353623	0.00739222788816341
-0.201338268036222	0.0276780125891837
-0.235964148780587	0.0547063862843931
-0.201556877051632	-0.00215197591817051
-0.180885109279289	0.061196322747002
-0.229424967181333	0.0778353518863688
-0.189643865355907	-0.0162601051910378
-0.27447696998671	0.0306621937668683
-0.203269526500502	0.0138742888217654
-0.229672420828734	0.00717693282404841
-0.172581201787198	0.0171013965788179
-0.182570823225733	0.0137068687816518
-0.190703455597352	0.0561439509508451
-0.21364375052645	-0.00107748492903958
-0.247737410703631	0.0366419017540408
-0.235424803140789	0.0575089272194488
-0.165161031051292	0.0221305503874208
-0.257827550940826	-0.0237682207325921
-0.185143026206484	0.0967271563212718
-0.20321007656957	0.0575414893633305
-0.195997505190691	0.0612812691930779
-0.154091544544433	0.0894900925952045
-0.22443151140594	0.032615676759528
-0.229766499001452	0.00184243891105351
-0.223844482392924	0.0306023140408856
-0.242745244988917	0.064286397386118
-0.18264371197921	-0.0123567176866238
-0.203250660240636	0.0653960933845127
-0.188115252842841	0.00778478251512915
-0.217072298871003	0.0408830910022433
-0.190240884573899	0.0531927925058705
-0.245283873024417	0.0556756563474787
-0.211677152589046	0.0392255791153479
-0.234085314216827	0.0220943917548173
-0.178369766020401	0.0371032471149179
-0.213498614525678	0.050984070552586
-0.214580211416961	0.0270072086053028
-0.237377052628936	0.0221890567210292
-0.211310131717488	0.0677876904468787
-0.182513874711089	-0.055105948957418
-0.201240158344956	0.0321683190790588
-0.186279652535007	0.115049387347398
-0.214562965312403	0.0838898058605845
-0.217487715147382	0.0258044752406498
-0.256431914573049	0.0110643584215032
-0.199149914231271	0.024633760588165
-0.212649231706507	0.0610981229099093
-0.201309709669089	0.00294713507370448
-0.260584408202693	0.0431024983372962
-0.264533697231791	0.034879191373779
-0.207104916299108	0.0191494345232321
-0.22179150416574	0.0301529785859702
-0.181190013343668	-0.0168588386089442
-0.190350571401294	0.0150524021969241
-0.2353588744929	0.0342962257923216
-0.190969553796162	0.0481594198915164
-0.219353908032532	0.0821346628819758
-0.182039051105484	0.0800278061885059
-0.239464633048423	0.0606508653915694
-0.19710501162878	0.0305899010587226
-0.271992356828462	0.0536621636923151
-0.270230163805708	0.013729291039392
-0.200264588428656	0.0865330049788905
-0.139190341430786	0.053244631993954
-0.147914678061645	0.0610856315037495
-0.205664790322245	0.0586830397475613
-0.233176289814772	0.0680725146150443
-0.174811861912681	0.00872044133499317
-0.21677293087228	0.0498618369261566
-0.215503597986538	0.0814800210875242
-0.190220654154241	0.00454462556024637
-0.225342879906878	0.112016331313375
-0.195725598897905	0.00510031388851939
-0.197902080281645	0.096802807165063
-0.233011398007595	0.00188829155493619
-0.223919356022474	0.0893673941116169
-0.189459056250891	0.028924492678713
-0.202071017636374	0.0365821377314378
-0.248505842062332	0.00534605321098514
-0.201818263242711	0.0134558605769846
-0.239238946604449	0.0918120792777735
-0.200605189825003	0.0258985743325915
-0.237089303211725	0.00824623883676234
-0.183397191822242	0.0724525801716687
-0.185550694277987	0.106444590014534
-0.217043009312047	-0.0248692567475317
-0.20426082342841	0.0608217957204369
-0.210710821369154	0.0201293544324429
-0.204662327269831	0.00873552124939347
-0.209904930160939	-0.0205980661873034
-0.245484291304979	0.0620811439973835
-0.195674217728679	0.0547049492840045
-0.224100794790027	0.0294111755504265
-0.212582583148539	-0.0162249282167551
-0.172180183688171	0.0878224892111654
-0.170521821573085	0.0501348663704388
-0.156920089082346	0.0397031813412668
-0.252295915171913	0.0775491037639218
-0.192586337743001	0.0195531008334741
-0.20399117068937	0.0273686630496063
-0.211698931288421	0.0671886553018108
-0.211496781909868	-0.0178481314821634
-0.218737172036304	0.0661281106002443
-0.145738271655334	0.000625475881105508
-0.210729202818755	0.0107381469623241
-0.158273746646225	-0.00642308887296089
-0.192609461026448	0.0373444500582121
-0.222390872606391	0.00641644589394186
-0.26364912717812	-0.00144780699967328
-0.176935669607537	0.012064605843123
-0.206634981383344	0.0437817210929449
-0.170432225861942	0.0511504217190399
-0.186478819756212	0.0454875031928966
-0.230039692925832	0.0736499866310493
-0.208513184478698	0.0531216971645225
-0.185141092784434	0.00702293725820402
-0.209195191058305	0.0441720290676657
-0.215386986608734	0.0480364854397972
-0.19266255154967	0.0458213445384336
-0.224248260557196	0.0248978652008552
-0.222420546707713	-0.00916442895248132
-0.223260930441446	-0.0167065486543869
-0.244072308331143	-0.00398158682496336
-0.231523075534209	0.0622810636523738
-0.200613546051618	0.00721811349527934
-0.197524634954085	0.0826503713055176
-0.162429696106177	0.0196493517266262
-0.203050910450384	0.100983557060954
-0.227374910151466	0.0553952528894928
-0.205687794648182	0.0588620590806058
-0.211193316798311	0.0463769260003889
-0.202334280628763	0.0832578184859022
-0.171894944165564	0.0562833294030705
-0.267490868857693	0.0202594928162793
-0.234215808195887	0.0250246982934329
-0.221989420635911	-0.0170602228885817
-0.21830277757875	0.0151210428273311
-0.216607370787957	0.0483856192276437
-0.172190657957252	0.0130514095853721
-0.20299244736524	0.0575625752187189
-0.194125923575724	0.065887320267362
-0.210398861005714	0.0432522156261591
-0.181081748267654	0.0673946162233036
-0.198678133731052	0.0439165107867893
-0.145569273286741	0.0329623555678979
-0.211845086448294	-0.0170877617429563
-0.211501073959959	0.0189658704881409
-0.222037828399402	0.0407737984499937
-0.190400788986646	0.0580544008926435
-0.193989884533983	0.00158387397884185
-0.197495248986738	0.033363780537501
-0.185953043965186	0.04192522939773
-0.241078059732063	0.0419717814128919
-0.180576369656272	0.0219223757365596
-0.224634594334694	0.0356910132108673
-0.201604055840366	0.0190790868441438
-0.238226007781807	0.00807292023308337
-0.132087169903822	0.0621709166217761
-0.22387942313298	0.0786725891140055
-0.175440019638331	0.0486607190907079
-0.214157169906243	0.0884922841371374
-0.194498187446516	0.0345311171070301
-0.21739882820621	0.0611204084848915
-0.209549353845458	0.069509882035504
-0.179623681612206	-0.0148017655914783
-0.193452676083149	0.0360244644949245
-0.198694423745929	-0.00171053793544379
-0.194715471593246	0.0574921806828091
-0.228925634145417	0.0341544473073451
-0.243103080571946	0.0243548392025787
-0.219357394628167	0.0131310894080268
-0.160280008877119	0.0181434323797004
-0.184787164888422	0.0188712197049014
-0.188971179419236	0.00584962150679869
-0.230899909044234	0.0253495204315054
-0.235242602107029	-0.00858087774181615
-0.183411250563984	0.0267140733962083
-0.210923674855086	0.048208917035417
-0.211905293196029	0.0399410238935015
-0.189400627442144	0.0832428157985603
-0.207445802647964	0.0650306702320826
-0.208417011063554	0.0129052489734091
-0.229464657962312	0.104143979208806
-0.207119967610628	0.00650595374916108
-0.180546498651552	-0.0596207063059762
-0.231135921086777	0.0157498452979649
-0.228495127500156	-0.0202782814456999
-0.174455925266796	0.0184636244008365
-0.221452562577002	0.0601513588124757
-0.211063903075208	0.092611509268911
-0.143586534930083	0.00339817919540453
-0.195082812125008	-0.0385301105077401
-0.215392671294619	0.027796466725616
-0.210157437153106	0.017522318495561
-0.225460074747055	0.0519778422939655
-0.193607416743097	0.0369480416950965
-0.181220660356688	0.0791839389775159
-0.280155707154778	0.0205682563291085
-0.173744783078406	0.0712261142310304
-0.205667247470892	0.0307074405304339
-0.21862880988186	0.0231855675996256
-0.257491489658586	0.0250207589063396
-0.225391855559469	0.0440465091537784
-0.19287839721726	0.0854700907522298
-0.234453270082606	0.0479399588646511
-0.18752761483121	0.0219637951682274
-0.179169422119855	0.0674129386523746
-0.182852825330287	-0.00466865034368863
-0.267063716019971	0.0522588181169814
-0.200902433169836	0.0599218828157526
-0.205465677145811	0.073775526624816
-0.168712332306036	0.0553337078766751
-0.188055307789823	0.0607911694045152
-0.213937141778858	0.0758646918691462
-0.146106641084768	0.0613897803677265
-0.223921579763725	-3.42729832842337e-05
-0.238421808192445	0.0241508774892765
-0.156502292986051	0.0473708624512479
-0.152590891009433	0.020015753082348
-0.202028780400899	0.03757397329971
-0.140594296800448	0.0246347868434682
-0.180999023863948	0.0437979311143506
-0.165751708891235	0.0516130413578666
-0.210384798806202	0.0253817439133166
-0.193389129231458	0.0555159193059602
-0.156266010365303	0.0276032569409357
-0.207731644038451	-0.0146758369945627
-0.210167249089175	0.100860558441322
-0.221898273110208	0.0792371229180651
-0.254719880531418	0.0201143357428551
-0.206964350822237	0.0932348145267059
-0.168885339424012	0.0283882025303536
-0.201992489715096	0.0581215531177427
-0.232249049222052	-0.0278148886695243
-0.158905362472242	0.0719408622520561
-0.227489852859009	0.0401663766220214
-0.232059592175967	0.0587298558295483
-0.238231050031457	0.0376756266566912
-0.172255526001801	0.0622962313135145
-0.218667597099547	0.0181187789054417
-0.211175875066987	0.0393927692217059
-0.226993260334384	0.0392607691637193
-0.191155266214808	0.0180193189348515
-0.207406834422693	0.00398638480619684
-0.208813885413969	0.0586596643660088
-0.126415345816934	0.0389088698652601
-0.220262158593656	0.0544524504451563
-0.231025405984979	0.0455680053036297
-0.214146239957296	0.02001178342369
-0.159327422746443	-0.0195832083891516
-0.247456867230047	0.0371152210991995
-0.204966500079561	0.0488494625712443
-0.146038313416029	0.0313825725119392
-0.206170019913686	0.0090529138313129
-0.187667864954368	-0.0244424458480229
-0.200402772585793	0.0494540657051838
-0.196836998926189	0.00179174754785361
-0.19217763838292	0.0434755467650779
-0.174288610758694	-0.0126341511121973
-0.176472924667224	0.0192556724077095
-0.226793600354423	0.0324826193453998
-0.225682579857835	0.0254137757116554
-0.210907186527939	-0.0111068693478079
-0.212405137852996	0.0765956531551233
-0.20322062323463	0.0230250490402091
-0.184074710223021	0.0277019820072268
-0.247134401454771	0.0162790632926755
-0.231099082951724	0.0523277482210769
-0.178349166940191	0.0535105470027677
-0.221832825677419	0.0274291686374604
-0.194565271810412	0.0809454675652908
-0.200090058643033	0.00757406704028107
-0.194971055081839	0.0637115995054027
-0.251722682262883	0.0288649837078992
-0.200499678516226	0.0121644031840131
-0.204085338485551	0.00305308968214668
-0.251851993480859	0.0825576546132986
-0.197190091397496	-0.000815443354584555
-0.188243459597593	0.037575482557748
-0.185264190553716	0.0285692389275919
-0.201770958379784	0.0135311537860289
-0.171345754081352	0.0655160363969488
-0.192346574471607	0.00794314456347334
-0.21399760462806	0.0547699930942573
-0.2197310819515	0.0174732246967162
-0.22518553069182	0.0284852616735439
-0.197734269814509	0.0249013422360225
-0.233707819971701	0.00566977245870504
-0.186849976426556	0.10452517459385
-0.244272552658488	0.052477505959949
-0.210141690257664	0.038251366243739
-0.220194650652318	0.00964841303415376
-0.214502996945608	0.0453060983400898
-0.168771167801086	0.0296615351901897
-0.185300983217579	0.0526919456263029
-0.192016192963132	0.104931056693726
-0.20453812608025	0.054059740956017
-0.206112008162248	0.0539139232760563
-0.235906254976497	-0.00245389365441062
-0.211816831527169	0.0387307036689158
-0.175479829020552	0.00553060517753678
-0.149388729979482	0.0458904225017522
-0.202880283906812	0.0603484421632605
-0.187060882163118	0.0868836690602156
-0.196888730224063	0.083382719927673
-0.188664781104324	0.074942107042381
-0.190967125603686	0.043022624263962
-0.1615976821065	0.0699234226477451
-0.197632811411315	0.0449695074130396
-0.208976928171562	0.0305080286228882
-0.205769552257126	-0.0336743125078577
-0.159670043072066	0.0514518292465729
-0.178593532721844	-0.00690077187113486
-0.181096201440532	0.0176101125682654
-0.198373065042777	0.0117402514310276
-0.218872976907319	0.0488502174843501
-0.241607621881976	0.0171993215828579
-0.193451324742058	0.0401701909844513
-0.157621817345792	0.010696314861963
-0.172789919876687	0.0703543876102738
-0.238420899955462	0.0253424161865895
-0.19943980610981	0.0488630542824166
-0.218028449326805	0.0440922511600104
-0.175704550094144	-0.0581491874771122
-0.178489564978711	0.004852582948915
-0.17518339729041	0.0626887369252146
-0.225310041476159	0.0496259608492722
-0.196193474706834	-0.00841822558568589
-0.220406443722466	0.0545357073681587
-0.210573837126905	0.0553998859949286
-0.151090367529841	0.0450898479176638
-0.125882104460909	0.0378622099906452
-0.19732911842952	0.0273182382772643
-0.16911671013476	0.00285498388178451
-0.263765251033858	-0.00354017535518325
-0.272572711996601	0.0520852528666749
-0.173249333559048	0.0444545534685278
-0.231628421276519	0.0192936930884696
-0.209882601829511	-0.00177210839529757
-0.190401511155421	0.0303854810751738
-0.195248483625379	0.0567225132522137
-0.194087713725604	0.0393900489352311
-0.176995101741895	0.0729214225854716
-0.22413337664114	0.00110172740852288
-0.235707880972707	0.0665668887673563
-0.196425309866584	0.0211022084092171
-0.18548085148773	0.0950324473726455
-0.18569116731125	0.0608651600733804
-0.244102175271051	0.0543698469957392
-0.181531825179318	0.0692835474446508
-0.191125726434294	0.0359547832429391
-0.208954186172404	0.0194498890868252
-0.214162636024903	0.0367107636384982
-0.207880765494715	0.0496807973218639
-0.193497770465556	0.0539155839147957
-0.113071552158086	0.0666411220747241
-0.127034831503546	0.0833233555780477
-0.200573409737011	0.0297876797197724
-0.234976381640102	0.0277119071803017
-0.205539695202437	0.0224105730436638
-0.171862352310392	0.0352801761087247
-0.216913267372357	0.0243848750009469
-0.218959241225213	0.0143857772946879
-0.21936323520836	0.047494688692209
-0.240573892889229	0.00729675180730915
-0.222114950955724	0.0254459426964372
-0.194043535450626	-0.00568134317129254
-0.172892366931252	0.0622702443086562
-0.247213800994991	0.07822900595014
-0.218809613829741	-0.00451286206413476
-0.204377951895798	0.0231663273270123
-0.171433957247859	0.068493910631918
-0.20635697112917	0.00726134341426732
-0.23212853065579	0.0159323850837348
-0.232237464178161	0.0188544887957477
-0.213869889395366	0.0562755511163352
-0.223616596108297	0.0526816132831495
-0.207767035399088	0.0129997946848298
-0.182320359415339	0.0253356563772724
-0.236006373974294	0.0385916351787702
-0.174977404370704	0.027355714139742
-0.251559752623509	0.0476906079157874
-0.188199560003566	0.0762912206954516
-0.217423557843479	0.0346278087469737
-0.200646640768758	-0.0112872017063805
-0.174975062951613	0.0440386250832838
-0.220367364110215	0.062986567809837
-0.181857436488884	0.0816837717220976
-0.187205208388179	0.0243597906474167
-0.23618541476447	0.0434697616813373
-0.182726305961655	0.00218317990686889
-0.169625659193822	0.00637684204975619
-0.223616204421803	0.0210368208497552
-0.20253510267941	0.0477370238306586
-0.207403354019945	0.0537914478309902
-0.23017022058758	0.0229192888212425
-0.217125861289117	0.0512336111739098
-0.210042960436545	0.0281241010616653
-0.177686799069379	0.0328177340957425
-0.188941716891887	0.0566397927200787
-0.141289967001702	0.0389578698496693
-0.221350827033903	0.0500816676455874
-0.224835401013127	0.0436162472492599
-0.172376505768048	0.0710542594391274
-0.186180091547303	0.0244708169085349
-0.226230821151797	0.0479083793864438
-0.173590340316384	0.0643947599083924
-0.211858335962648	0.0492574567379825
-0.226433470392235	-0.0325189853578143
-0.181763599083532	0.0275370262067984
-0.20890744271489	0.0677578574124752
-0.203879254982008	0.012927023867836
-0.240625546289033	0.0325656855593691
-0.23884721188681	0.0166743507407771
-0.142243332533826	0.028753906757606
-0.195268961179012	0.0830618157807402
-0.192401872229493	-0.0292497064426605
-0.164734542655607	-0.0612045206984991
-0.241519858065292	0.0347795590099417
-0.224702757052015	0.0741756294806255
-0.218115691323382	0.0808795792701322
-0.214552392853369	0.0444902940598746
-0.232879505089227	0.0213430091848452
-0.198334845551025	0.0631668792373649
-0.149862109928686	0.0396830355348154
-0.18477380436934	0.0930518625610334
-0.203771530451707	0.0133383911603958
-0.218912901598222	0.0272990289539812
-0.146209908441942	0.0247270914059384
-0.205429658787523	0.0400809479365575
-0.196505397001786	-0.0125220058789047
-0.184850795763981	0.0338496801237066
-0.222970035980455	0.00495666432437847
-0.217327591391017	0.0277880130259069
-0.258086028506701	0.0811662283628282
-0.201932340678984	0.0140961531696424
-0.149101977148105	-0.0310844745222104
-0.200739435775371	0.0560344824200154
-0.173279882621509	0.0351810691632304
-0.190193196846324	0.0803636629112756
-0.162086608309917	0.0293188324194855
-0.123014053320002	-0.0045676480720015
-0.177246345775274	0.0795644811396928
-0.196466778441352	0.055485153240022
-0.250577362493577	0.0279532390164452
-0.191880029820218	0.0954410114816877
-0.192067064004641	-0.00813242559160304
-0.212156980529118	0.0190889114190035
-0.174593641337942	0.0811134895102992
-0.170373021274073	0.0470967430154073
-0.238285846872812	0.00679998710904739
-0.205609638736068	-0.0537657508667546
-0.200751118560215	0.0444902045533979
-0.249702217393253	0.0571416330212901
-0.233183350325637	-0.00187982082069205
-0.188105700045663	0.0456597334429286
-0.241267744157964	0.0225101410739952
-0.228073681300369	0.0679366753217805
-0.171324622367471	0.0863969661606716
-0.170981382714787	0.0601380619116533
-0.191151946340121	0.00980243160000227
-0.217864652477115	0.018553188588326
-0.237325410710091	0.0629755016467191
-0.215347518990983	0.049737841533378
-0.192043709037301	0.0242502129621701
-0.228690861412073	0.0231215374713462
-0.20524463436006	0.00804689934779956
-0.245567387088679	0.0172030919493614
-0.174817342568036	0.0610591662121629
-0.171854233283427	0.0429060752186241
-0.254290697657885	0.0111639758145232
-0.162550766103993	0.00489777001277292
-0.203125959953487	0.0936250184632735
-0.18822739206674	0.0474639096986036
-0.234751570138142	0.0472058892854982
-0.212364303655164	0.00927693420396958
-0.219646561878064	0.0458775511494772
-0.238688023538156	0.0502686023819647
-0.241684232518629	0.0486426330690041
-0.203452723838831	0.0159985841147788
-0.18729639395676	0.012850786410929
-0.226696531493145	0.00568557597546693
-0.234538856837536	0.0519892047737081
-0.166441602763054	0.00969915683810274
-0.223849256916099	0.031167983821365
-0.246920095331971	0.0972431761774284
-0.220560894631531	0.0230181211289122
-0.181061384505476	0.0895429566548946
-0.18059174284948	0.0490726245398924
-0.208567080089443	0.00935066786287997
-0.226120021485256	0.00971398385716216
-0.199920412526807	0.010359572978123
-0.176527209285589	0.0365237655926364
-0.226515481966467	0.0306912981060043
-0.231265712916817	0.0856445309974224
-0.250770414015337	0.0258228083159746
-0.196974795215371	0.0253300808267491
-0.168946720757233	0.055987365541846
-0.237405812445168	0.0115715598178687
-0.192520877636997	-0.0347194471934399
-0.205301893654825	-0.0280017168587283
-0.243546229156147	0.0952735401536532
-0.195599227463639	0.0734215687547618
-0.220763925591184	0.0492880902434514
-0.201366871126559	0.0562686489869075
-0.220660621307321	0.0557605237191804
-0.220967081840912	0.0325933868979044
-0.205339210314233	-0.0340046611245866
-0.21136942648513	0.0552990973531521
-0.161070986501369	0.0278599608482656
-0.225652960810182	0.0775265579135641
-0.224156414092027	0.0234957760744942
-0.218006971472315	0.0284747468364663
-0.189849683563544	0.0526793911713388
-0.266975606768231	0.0534775294502529
-0.204004862336217	0.0297649503944807
-0.172248665288846	0.119441816313971
-0.213487685387436	0.0257510650369882
-0.178568806302154	0.0429092404398091
-0.185291692210498	0.0438727650323618
-0.244879919918742	0.031059003415349
-0.180942682658686	0.0122887514457546
-0.219136774311762	0.0172336955169687
-0.185085387317182	0.0277571908330858
-0.23427778976423	0.0572411309652741
-0.200913652454588	0.0707514079250542
-0.220796935163099	0.0467448083567933
-0.168434779657485	0.00135078293686919
-0.18455686398197	0.0421533429146913
-0.181838422065147	0.0971237770251946
-0.165829924214137	-0.00686093450680708
-0.181716028750021	0.0493130657818512
-0.200192647841913	-0.00250654387322685
-0.214673906199529	0.0339252493231157
-0.234379757112708	0.0527585584790685
-0.223425347913488	0.00306622616743679
-0.166656036891329	0.0601990305736276
-0.228987877008314	0.00851468025248314
-0.180798132318081	0.0254708588191078
-0.196888113776859	0.0825917990521069
-0.222789872380902	0.0464414939911834
-0.180025659562222	0.0204824088047845
-0.247509006198723	0.00142255332633712
-0.232798442678689	0.0341030553683977
-0.221696644140464	0.0148889799466587
-0.201111057035201	-0.00679681402447579
-0.177450402968964	-0.0250339361963053
-0.191260451053839	-0.00965759671509159
-0.175153439896828	0.0145054546692315
-0.224382339997393	0.0813468831533427
-0.232630554782221	-0.0117472222918035
-0.202433291286682	-0.0106935976563449
-0.193960801423894	0.0357321888349657
-0.183625676097211	0.0601192596159676
-0.171512191160774	0.0235263587847877
-0.217692448976643	0.0341485933525486
-0.238442561292561	0.00614142721180477
-0.157125943894156	0.14099216825399
-0.168432389837406	0.100685894168257
-0.203629358965456	0.0818218399505924
-0.193010163421696	0.0228536966532512
-0.206031219503377	0.0300338167013449
-0.207644632901542	0.0415945526157596
-0.209849985054395	0.0788935601333615
-0.193139056296932	0.011398796440817
-0.255280880940279	0.041036876413172
-0.231205270389161	0.0275920035386923
-0.255355319481629	0.0849431939819384
-0.215964394070685	0.0129644163050909
-0.187627389610627	0.0315522570189993
-0.234173919860836	-0.00477243931042309
-0.241423640734027	0.0739173250221873
-0.198524668594281	0.0461290869317467
-0.216063541235859	0.0462257452839993
-0.223743749567026	0.0254003619741261
-0.200273578185776	0.0574492665950435
-0.276820902309941	0.0263590170682437
-0.166941663349067	0.066677666320388
-0.258460760818426	0.106950962270553
-0.184186874236864	0.0620378011891886
-0.190223671690742	0.0506107536983728
-0.218123470901849	0.0405920770891097
-0.196601121533212	0.0594964954247721
-0.222711218730356	-0.00373703480130599
-0.16682389060596	0.068071739246397
-0.209906988028271	-0.015187954516578
-0.219414858981996	0.0545618168235396
-0.227985424954472	0.066133115945584
-0.233331581683291	0.0413840405324674
-0.211733578917672	0.0438179540558032
-0.174352043407317	0.0544792463874205
-0.173432486708046	0.0756135592078807
-0.18717879918078	0.0843961702205923
-0.241689768500714	0.0656163563633894
-0.218881281163902	0.0317544629673908
-0.157548150117792	0.0127217854010995
-0.162407412564088	0.0472590299777464
-0.199618529080754	0.0344180081605127
-0.169965527958621	0.0564431050906872
-0.245741413134895	0.0512784727844635
-0.232158307385737	0.0392679628139567
-0.18901598962833	0.0660147781034112
-0.27185827264838	0.0588250879954367
-0.226948770996149	0.0369850106538885
-0.179812206552873	0.0382996457685674
-0.225524553072055	-0.0154141298956174
-0.21110056984136	0.0284789855632575
-0.203528735479971	0.0617449400029609
-0.193601777912385	0.0334156502145119
-0.185584466262335	0.00589556821931236
-0.229934753256559	-0.000913121329281452
-0.20750532106394	0.0228086949381225
-0.194022521535502	0.0530622764790317
-0.256551314657779	0.0145794491906364
-0.222252975742724	0.0322285351731678
-0.257080513326167	0.0766155820141307
-0.175227736645894	0.00790329808959545
-0.207366223654037	-0.00859601235443286
-0.179753254550276	0.0174760497056018
-0.251673276285177	0.0393048334507095
-0.222923160622471	-0.017205584225833
-0.203548559126069	-0.0105087440920327
-0.183272009752915	0.035978757455477
-0.190813548135737	0.0379875799565152
-0.183904805423921	0.0281360908214722
-0.175638351441734	0.0535020715925134
-0.223742267831412	-0.0119325552068549
-0.189880289724519	0.0520106992650556
-0.196022148148978	0.0784452304899419
-0.183226805589159	0.0181930110724999
-0.253282407697455	0.0723760075931985
-0.205531529716692	0.0336553706479386
-0.25303452645577	-0.0110026353600918
-0.168246131351325	0.0675868560500441
-0.197484767974655	0.00417402735689609
-0.25716873366511	0.0480417060026199
-0.207008943333364	0.0154097349729135
-0.216391539211057	0.0202248685646528
-0.211297348317322	0.0422167293221001
-0.201349525409252	0.0889242249927935
-0.251065458659201	-0.014959572256506
-0.22067075923592	0.0927512501559454
-0.135830248105163	0.037287749812221
-0.188768776433879	0.0781483419251159
-0.195063119623216	0.0500842896055395
-0.211440008977592	0.0470985626757914
-0.195583283049435	0.0845913126708941
-0.181449604292145	0.0353312642416134
-0.193670773482993	0.042393672846338
-0.220767871006267	0.0611198533400645
-0.189052875802738	-0.00406007286229054
-0.214009236871013	0.0533441388375274
-0.185681129403441	0.0335397713595783
-0.234353247464469	-0.0152093377792612
-0.225421691462669	0.0604172091784676
-0.209448302601416	0.0140928030811461
-0.166332810862734	-0.0404371379920443
-0.260431110100329	0.00872423704292291
-0.236709397474438	0.0792571450444249
-0.216935061736185	0.055662653192738
-0.179675526844125	0.036973983319622
-0.224374487168735	0.0416237348728373
-0.178800553144377	0.0414725827798402
-0.223215103928974	0.0120393296459711
-0.216684440188874	0.0700929173145011
-0.182611333836117	0.0491573030946038
-0.186523154236964	0.0514282920913028
-0.192509778285306	-0.00752091239333469
-0.222946820935176	0.0613966997382115
-0.207978318117686	-0.0166031646044295
-0.211463673129924	0.0857349930961537
-0.190827019168019	-0.0302960382154257
-0.195812243590081	0.00622537597636252
-0.226409743005398	0.0255793163646509
-0.182954205486867	0.0582197214448378
-0.182599433316529	0.0076718406120212
-0.208398147584141	0.0795002120799947
-0.187842453608704	-0.00773142063097171
-0.215305217076289	0.0862889416559708
-0.207523443978578	0.054060080501631
-0.19671003814407	0.0379177171076018
-0.244753453233243	0.0056483154903364
-0.202372432416488	0.03147420994073
-0.213837680824785	0.0477505190985478
-0.249226092671801	0.0162992259578925
-0.212301538780436	0.0174071957940141
-0.184362872869662	0.0631977976911011
-0.202632211398865	-0.0141653618442165
-0.2417142387742	0.0403116673530888
-0.170798143838818	0.075100985301319
-0.16986665739518	0.00576159601317494
-0.235135928351744	-0.039096377697822
-0.220466253715348	0.047432797442159
-0.173608802995635	0.0918248185916596
-0.232712113266518	0.0374423419785823
-0.229254447792164	0.0375657366611645
-0.222878885083294	-0.0157778998711638
-0.183229851903852	0.0575350128551619
-0.210056119976924	0.0363766041725723
-0.178071735391154	0.048991296408875
-0.187059431199917	0.0281506005154056
-0.168616023572533	0.0217539984347289
-0.197176451763295	0.0438283026605205
-0.196466179363548	0.0322491266389795
-0.205847301250075	0.0699247880555632
-0.183448090796268	0.0420073120776968
-0.222815604673934	0.101748827848752
-0.227770826748371	0.0230700203990634
-0.209065860343276	0.0390546164730645
-0.187999454888842	0.0462111165795535
-0.216056596736351	0.0563080743797049
-0.254795624959958	0.083508610423494
-0.205520339946351	0.0865574323056513
-0.23337235221189	0.00486776636944997
-0.193024190379087	0.0752996604816225
-0.279635279022585	0.056779800722082
-0.236227181021439	0.0404472593070753
-0.215000794228017	0.0185791268944651
-0.164746216257665	-0.0293760992006693
-0.210306671959648	0.0182418175940063
-0.190800992420427	0.0163567133435207
-0.243950759209468	0.0388227112569672
-0.218058803387926	-0.00523140793289206
-0.189624916247636	0.0406119290225583
-0.203027890794407	0.101723220985939
-0.168459920459436	0.0948339758163221
-0.179658291266279	0.076270880352861
-0.168119086628757	0.0287420876921886
-0.177313621420032	0.0242517550409374
-0.183650233532647	-0.0311475401232464
-0.175503576607798	0.0594689633461883
-0.208794823672826	0.0430669185360644
-0.195971598486213	0.0326685672532709
-0.201697873511288	0.0554824971162163
-0.229732917428704	0.0589264838469705
-0.147007839823962	0.0470835705566187
-0.236920644381424	0.0452550457770051
-0.187729251950653	0.0523670829454916
-0.241589887538036	0.0397565974842864
-0.247725520381444	-0.000611129878950012
-0.18128386515383	0.00658271238710195
-0.238000022471506	0.0307520190240832
-0.20984105027574	0.0215156579552412
-0.16325134074253	-0.0147397357362314
-0.164311140389319	-0.0120146260263175
-0.170823718353879	0.0016032442543038
-0.235719477782781	0.0349989513572564
-0.217207069770897	0.0510441674419673
-0.193284352634234	0.0366725105755884
-0.177668749043525	0.0279564428737463
-0.190688024220246	0.0581144496986652
-0.253200557590794	0.00164119284317854
-0.189022059307537	-0.016203333400472
-0.189359834431147	-0.00644561639643865
-0.231166432893719	0.0431994045708936
-0.183073169022921	0.0140662362813242
-0.207275003199822	0.0632640814074256
-0.194185374692957	0.0720448322642556
-0.189470960750749	0.0670842305916862
-0.194167043060582	0.0333676468896259
-0.202018058685261	0.0150408730522509
-0.220831152963366	0.0125338325440304
-0.186721279841424	0.0280860486880407
-0.170921474408465	0.027431019225401
-0.178264268078168	0.0341798834509275
-0.231666193177161	-0.0238864024384527
-0.21795369811596	0.0197872198349281
-0.225888740451837	0.0147517696725549
-0.174286919602503	0.0290843185759125
-0.239866480658677	0.0628952172532586
-0.177229606574942	0.0121486270202663
-0.225165425659851	0.104793142375589
-0.202342073626818	0.039891542418626
-0.237688204095455	0.0654585650173434
-0.207967315324362	0.0662159408755464
-0.161983085114474	0.00405677221861778
-0.247420383085789	0.0344681934440901
-0.202037529743619	0.00825474884648514
-0.18904295254925	0.0306653194246342
-0.219023029141466	-0.0405370682499182
-0.232292217061918	0.0615515424352152
-0.192284760452251	-0.0161808617430848
-0.181583026253503	0.0520768134582615
-0.193444020299024	0.0217601416938812
-0.211164397789167	0.0543263097388313
-0.207507035324758	0.0632766858040998
-0.179236235908675	0.0223637314645385
-0.222265321279324	0.0357690091849231
-0.185106238201723	0.0586452303677012
-0.199796007754518	0.0540625972217466
-0.206583210951092	0.0627420528588274
-0.239801950543587	0.00910373262114661
-0.240412633187001	0.0454444892407847
-0.176455403601705	0.0203094945216971
-0.189103333708055	0.00103259989847326
-0.226286424045527	0.00637252525502618
-0.245832229427986	0.133994243548916
-0.228638258497982	0.018651169450111
-0.216628968273758	0.0530242272476088
-0.184482950678284	0.0546084188115367
-0.240790751406793	0.03147791407892
-0.192929832685139	-0.00169676720443596
-0.182065369261167	0.0274811743209598
-0.184694961307708	-0.0302888390422142
-0.194753778932259	0.0243613250608482
-0.194315345902113	0.0628014402172546
-0.197537061699472	0.0599741281984539
-0.188617751685486	0.0587563961162559
-0.223926339015775	-0.0415593982965412
-0.144152882207922	0.0330171346895015
-0.146625921883374	0.00371292250802657
-0.203037162428795	-0.0131621256196178
-0.13209185450334	0.0188762620867465
-0.185122293388538	0.0413886587569847
-0.200435446656746	0.0226949360245995
-0.23276584511031	0.0225263460253915
-0.208436864992272	0.00566039218925585
-0.155711612583926	0.00301887636908083
-0.210486614640324	0.0340436907900794
-0.157317552002314	0.0270388338992075
-0.212175282683027	0.0539947512956883
-0.195715282665959	0.0163958733751527
-0.226684982561286	0.0326349678151162
-0.234160639431017	-0.00978659936258802
-0.205450114237323	0.0413891405324435
-0.237680792059671	0.0771669847702989
-0.193882708077071	0.0463529009187271
-0.158671639776299	0.0677678388477087
-0.235628293838737	0.0053808431449377
-0.236845087995199	0.022357360261966
-0.241374624819038	0.0680902323819814
-0.182188675191743	-0.0207370244973494
-0.235062613337062	0.0064579571459823
-0.179708769067388	0.0274529393741721
-0.212560236520277	0.00971819897273407
-0.24142938125829	0.051695655698742
-0.209547288499583	0.0681311417619775
-0.218135573893939	0.0227127127827861
-0.211865468069385	-0.00139250005985669
-0.207603737955183	0.0315250162740205
-0.216503371220601	0.0674788618848372
-0.208814189087998	0.0338988951118027
-0.148756462586817	0.0188465648467052
-0.198837673649713	0.0693104056608671
-0.204115143326353	0.0421905950918788
-0.176290420504414	0.00928997576142809
-0.160828662705663	0.0874015961427111
-0.185962952595206	0.014418896984922
-0.236589918266682	0.0646100039429279
-0.155704858098174	0.0658159753863511
-0.222150695976429	0.0123019573956976
-0.220943574707475	0.0510818943841156
-0.217793397192351	0.010386832308055
-0.19513748689588	0.0542119367413637
-0.199130183502819	-0.00305020910402426
-0.222807679139414	0.0826635936012106
-0.173011468045779	0.000400706016805197
-0.205802646891046	-0.000555559733879774
-0.217666921611643	0.0365896285584041
-0.257088903247921	0.122501344572686
-0.140314807461647	-0.000594419795102885
-0.166787336160953	0.0684902377335486
-0.210737057965545	0.0483022132434329
-0.232810123199233	0.039996705803133
-0.207370951003993	-0.0231149296151238
-0.24668576504016	0.0587471052604002
-0.189156542707204	0.0078303768173662
-0.22040381945844	0.0137498830563731
-0.20349544027579	0.0366344735966453
-0.249999310043526	0.0282781979988777
-0.206328946690283	0.00777224847023428
-0.243815075480727	0.0257774896712107
-0.213098035603302	0.11066942638952
-0.188538251723767	0.0396760096940943
-0.221887104721724	0.0843854233940438
-0.207174012434834	0.0850766059708277
-0.236419814127019	0.0448820882282776
-0.209838457918898	0.0292835099953669
-0.236202607893249	-0.00725343448339627
-0.226489091240262	-0.00724186310180541
-0.223994122441458	0.0225327345476249
-0.252882963489019	0.0424232350482288
-0.23535769798087	0.0445762366894008
-0.248390853666466	0.031070298364827
-0.21849640301475	-0.0108978108848159
-0.175943877168616	-0.0218061820140742
-0.176669053581284	0.0615936056530416
-0.245021448132104	0.0662144554666342
-0.224061840258893	0.0216700379272872
-0.138814361831451	0.00174413267437645
-0.189673761087899	0.0337850663309522
-0.211802897605342	0.0260587761708737
-0.192016694746298	0.0493901160519452
-0.204711013341133	0.0797656515187987
-0.18818368087893	0.00741455514233003
-0.210703162965422	0.0109050666505852
-0.228950026750781	0.026995019086224
-0.227813550454628	0.03435667328112
-0.212453736399597	0.0286313227510743
-0.17099812526891	0.0291003277905808
-0.165612844590217	-0.0167569936945127
-0.189305877838927	0.0587924343492435
-0.211910146728027	0.0843481711990143
-0.193130406710505	0.0130485167134912
-0.154967361089581	0.0376873842084222
-0.211512568100074	0.0196405776914779
-0.208373795235418	0.0890747331254308
-0.173993573359012	-0.0219133981777349
-0.268396648025354	0.0487040139817102
-0.242824289391739	0.072046345491001
-0.194378285649529	0.0552250154128022
-0.215109088506329	0.0686597516585837
-0.187597253425671	0.0429385069951435
-0.180053300430377	0.077764061965564
-0.215172405674166	0.0378047113948674
-0.20582966172904	0.102549990976363
-0.200759751083535	0.0580759182589543
-0.231410039886586	0.0349016552185302
-0.214264762531624	0.0119996099488336
-0.215988782217425	0.0227932837574361
-0.241162481615403	0.0370262699466347
-0.148598612519356	-0.010467241651553
-0.216128418903262	0.0435340326818989
-0.183275830537827	0.00305565996477464
-0.164341922294496	0.0182719912444974
-0.22817793438804	0.0414469937699857
-0.213157407598556	-0.0108461216610158
-0.180387901072369	0.0342706192014645
-0.208117971770412	0.0676715911731444
-0.235854637122088	0.0377147206225348
-0.170132376471784	0.0511454838570939
-0.212105009777074	0.0311673272867652
-0.154764894493898	-0.00943314979749821
-0.189817511672566	0.0113131497427083
-0.191874363465988	-0.0197083063637993
-0.19348091384577	-0.0101184612836906
-0.210063902920374	0.0204406820039242
-0.173708032677495	0.0511631970229548
-0.177594519882177	0.0368553272794795
-0.19601004570611	0.0201573908099243
-0.226571862932097	0.101628586327047
-0.231644077541979	0.0488792098421617
-0.212029202290937	0.0545729187974918
-0.213964643254937	-0.00840578869493119
-0.181262890133205	0.0198250524405398
-0.218519519392572	0.0420820860245107
-0.198541157976427	0.0751254249351553
-0.179740003215703	0.0220415966448498
-0.178393780791365	0.0976794976267125
-0.255263239817163	0.0546552090766096
-0.229444373846239	0.0561798770349815
-0.234836534221715	0.027521079801619
-0.22645664224036	0.0104449366554641
-0.258688850584396	0.0298468223107039
-0.183393960751957	0.0181210898728149
-0.130437587672154	0.0357615051461727
-0.196104092693937	0.0437441482976054
-0.189601345927438	0.00604496524538334
-0.220646909843546	0.0106505613878135
-0.182392510716131	0.0688719458246677
-0.234448336690783	0.0254385033912197
-0.192025492951272	0.0623356923906544
-0.200045065411063	0.0550959248189119
-0.213556632122581	0.0443597422337478
-0.219726315477682	0.0721800193494944
-0.19024541401877	0.0413709668786431
-0.176007501504282	0.000500297161266872
-0.16914732411736	0.0188279257876066
-0.142511985154857	0.00394115330702349
-0.185629441026489	0.010333687196001
-0.226229276982957	0.035790087550817
-0.150905538742322	0.0928419867777107
-0.225721440902565	0.0695953709929946
-0.18232896737054	0.0134583366272418
-0.256998412769566	0.020561117311384
-0.241364946071836	0.0224930190173381
-0.199822898979532	0.0418132652415499
-0.198671630151813	-0.00782133381369676
-0.210523410507185	0.00491614847568012
-0.233682753791122	0.0232797479964533
-0.203711029641127	-0.0136266602342266
-0.151823887911899	0.027848905683906
-0.196982762077621	0.0103018383452255
-0.207338856935041	0.0802558556853831
-0.233463457327889	0.0382750507376353
-0.183922264338736	0.0214784822109908
-0.226523219933935	0.0572432807291857
-0.185738242896445	0.0454650709913333
-0.19645463313695	0.0577776192239102
-0.191416634058616	0.0493481465082157
-0.21224325520708	0.104109230071024
-0.211158252183493	-0.00665067105421352
-0.227616276234765	0.0147912496163994
-0.227516634104192	0.0154365029051893
-0.192031871064319	0.0876806185517931
-0.237547607848277	-0.0051415080740862
-0.193535120315709	-0.0175923182517881
-0.196819014520611	0.0110545305716672
-0.213217716227315	-0.00249082632146708
-0.219496660828247	0.0763711417778246
-0.190528863069195	0.023478701392215
-0.144325936401609	0.0522722402645858
-0.209343058768599	0.0541721228264446
-0.198159690576118	0.0414801699208818
-0.21932138180822	0.0146177401195078
-0.217675647472289	0.0223403384178289
-0.261025577324011	0.0155007284477474
-0.204043460528744	-0.00577558716662874
-0.287529992191284	0.0360794120823112
-0.144940623976813	0.0253748255683089
-0.219315236590578	0.00292027881916379
-0.258765141402476	0.00768140395243777
-0.20830659560461	0.0757186067259428
-0.221799976439514	0.0595305514761645
-0.143662511822408	-0.00131201307765916
-0.226285081044404	0.0409891123823118
-0.23136512276626	0.0189161465139843
-0.191840860295169	0.00845191019170199
-0.229206456086982	0.0168423662050674
-0.182203095744749	0.0211653168621562
-0.21855695386276	0.0143697252570155
-0.211109074525768	0.0512272143345066
-0.220225810310201	0.0420682756132221
-0.193376654736888	-0.0115052250778952
-0.182318918955018	0.00920820644616571
-0.267898267694002	0.0150920082724498
-0.227335794236031	-0.000404702791729272
-0.196617698274492	0.146595404072176
-0.223709320822689	0.00809894662002886
-0.22525517865765	0.0453012727170676
-0.219253706099349	0.0285281565801401
-0.208546662478011	-0.0306610265962325
-0.273669446879229	-0.0415738943675824
-0.146545676208091	-0.0103641554314287
-0.194247887966443	0.0182398064291522
-0.21304991302366	0.017668917669694
-0.254641027167187	0.0816120521302387
-0.205435855652559	0.0389551328874856
-0.237272990327645	0.015840747122591
-0.199213084440984	0.0535211682477932
-0.169885572505622	-0.000928694159990195
-0.209340914436925	-0.018393780759299
-0.226857699307528	0.0769670227165834
-0.229439947465751	0.0285333773073727
-0.197107572249077	0.0487713830230203
-0.206149827186561	0.0383547719141841
-0.252825219591565	0.0477702366785734
-0.194811870988893	0.0178264487106304
-0.231166419074904	0.0472593768122853
-0.196138138646289	-0.0440346081567153
-0.200655176322544	-0.0325553617531348
-0.193410561455487	0.0116283370401187
-0.214287250116579	-0.0158163912734569
-0.226735580884771	0.082794790449512
-0.212476973307568	-0.00713991771839578
-0.238184677232866	0.123324194762975
-0.212992026799623	0.0363056452761529
-0.249435443134259	0.000389092677873015
-0.227490949195463	0.0658829123214756
-0.140982834304017	0.0301508652596271
-0.25082512736771	0.0219827138542263
-0.222149633797519	0.0367575778866012
-0.225473256491656	0.091596725218397
-0.133509175115901	-0.0212066006779124
-0.159101941479104	0.0655418968249376
-0.196321882878735	0.0708838904219042
-0.196725340498006	0.042840707925982
-0.171571095906957	0.0384027376705958
-0.216494323311705	0.014025071991722
-0.207360487185941	0.0174885972597181
-0.173263488122237	0.0260539281415541
-0.199091786098976	-0.0249143864078932
-0.17580571764271	0.0232462607909709
-0.17962331618817	0.0724475637674904
-0.186408156358953	0.0295946944317262
-0.20180688631375	0.00348152012280467
-0.221630512465052	0.0916793750192023
-0.16762083285109	-0.00642980372165708
-0.18489596833278	0.039091848126166
-0.246714344954903	0.05147534690491
-0.214791465768294	0.0418530161003582
-0.157655513556177	0.0210238470027387
-0.143432003985651	0.0204782853212572
-0.150071956340008	0.0161888607902523
-0.190801211628497	0.000582822123866844
-0.181139039607624	0.00901843386745749
-0.14709026336535	-0.0233708432515871
-0.202101311538972	-0.045050122896759
-0.242072757993093	0.0314732681351492
-0.208317933393092	0.00277631189105754
-0.220504423591568	0.0435178866709287
-0.1805175292174	0.0464187366490992
-0.241497702186979	0.109796155811234
-0.247261008361881	0.0202047526544888
-0.142661563475313	0.0401881764464705
-0.212765000108751	0.0836123836392783
-0.189626645456757	0.00785847844679111
-0.235824848591088	0.0207333405356216
-0.208951069698854	0.0576665352508408
-0.199361163133909	0.00995754709092356
-0.248724618954977	0.0247350342646214
-0.193120836935003	0.0455389763905309
-0.148786276362835	0.0851133433043963
-0.21501137847759	0.0280357702777777
-0.163503445463228	-0.00102563738317335
-0.213401211933857	-0.0449077106956874
-0.199356723498861	0.0219098530921272
-0.190530280938826	0.0379467236946538
-0.183994496025545	0.0227228962803379
-0.233592962193909	0.0608870531638165
-0.167760644221023	0.0355295969417827
-0.287254553333705	-0.0263670168688673
-0.180879589714613	0.0338278579229786
-0.227686686077484	0.0578955259651367
-0.233120508424237	0.00600474388296368
-0.253926002020215	0.038569756654387
-0.192715564543573	0.0317288355079329
-0.222515139578864	0.0696161019611639
-0.205019384840994	0.020897260558487
-0.232506078198053	0.0663835642152663
-0.214047724416009	0.0391273883869694
-0.230677417673777	0.0499359492627037
-0.294446767206955	0.0141378950877347
-0.193123596790461	0.0343758743482691
-0.21254784995204	0.0370620637948199
-0.188359421306134	0.0630216849783057
-0.232005565675549	-0.0234591992510289
-0.204261894564802	0.0374957131442439
-0.242440244812045	0.0409313602110942
-0.194521173712587	0.0353270511009719
-0.225036354041332	0.0281705525347568
-0.223917199550396	0.0372680125413487
-0.185796098560492	0.0565214758692976
-0.193683001808946	-0.00327127311994729
-0.197829819541879	0.0573473838481955
-0.226329097306273	-0.0574596813523341
-0.222647519335331	0.105785999305819
-0.188398648185418	0.00614396309900589
-0.202346072851819	0.0307878218617093
-0.184995672011365	0.018958758213614
-0.198512170805721	0.0171854887150296
-0.230893840583723	-0.0023860285982556
-0.223269207510421	0.0303709702398255
-0.229285761319917	0.0282810135477952
-0.186038940671555	0.0379825970467788
-0.216588833456053	0.0462336769663395
-0.210070444989983	0.0505546067511539
-0.200096380384152	-0.0233005421433463
-0.191184992930908	0.0417736339329187
-0.198132875952898	0.00263979542917359
-0.182977153035272	0.0497304942256966
-0.21170553637894	0.0647035597173861
-0.226795240597922	0.05024625117773
-0.233249540879327	0.00987740439259033
-0.189130445716946	0.0272388785099045
-0.194589081381383	0.0227596731145229
-0.203608835296205	0.0326556652011628
-0.224601346711794	-0.00109069802477696
-0.161939494043336	0.0118086579809297
-0.178048145676469	0.0167649953009591
-0.203822339866057	-0.029153384918812
-0.204217579555081	0.0233112367032992
-0.174780250442054	-0.0351257643363572
-0.161462348103498	0.0845390053760378
-0.184389438729929	0.0406723330540166
-0.189197141251948	0.00698068682616748
-0.217450618132981	0.132950396163698
-0.19305082684983	0.0275728012112074
-0.192862734287859	-0.0047912037379037
-0.204750113304539	0.0809715106567194
-0.24123899867661	0.0215635510467619
-0.208142837908945	0.0623387649779796
-0.195137076164668	0.0677230175478237
-0.21867165011002	0.0897420355743782
-0.189260260019949	0.0381833217576349
-0.218704767907413	0.0988240444301175
-0.249855237753635	0.0661051030767926
-0.194888060521378	0.0667751755249045
-0.226018630004179	0.00082573601229885
-0.214084596211339	0.0793737431614371
-0.197298430907723	0.100318599335178
-0.182674435407085	0.00354771456740588
-0.244221194606202	0.0599278124212684
-0.23790228946307	-0.00491754538753902
-0.203369736993978	0.0878207535297647
-0.217967965564886	0.0412432628809021
-0.131704494467777	0.0477454016416045
-0.209511619140344	0.0557829249215009
-0.210501185532358	0.0516527386642891
-0.192022789796884	0.015089811431336
-0.158824432292375	0.0223687961382436
-0.172255332181863	0.0332584639279095
-0.213683842609288	0.0449971127178546
-0.186395312795584	0.0299922854114585
-0.122371077893974	0.00986334662480615
-0.203241529234589	0.00527130165537015
-0.212993519529487	0.11803480324586
-0.227967240521054	0.020501074131523
-0.197102798005572	0.0329010990778111
-0.226666129335261	0.0541845910013963
-0.205406772839557	0.0748921735431021
-0.193416002077666	-0.0169753754489289
-0.193704402279361	-0.0373138080099311
-0.177448579576417	0.0698186999014282
-0.230796459295763	0.0746680743072312
-0.200005938745153	0.0253335762523512
-0.211023591116239	0.0501895256782099
-0.205953396544914	0.0386943537680244
[truncated: 8,001 more rows]
